# Supplementary material for: Sulforaphane rewires central metabolism to support antioxidant response and achieve glucose homeostasis
Source: PubMed Central journal article supplement — Redox Biol. 2023 Sep 7;67:102878. doi: 10.1016/j.redox.2023.102878 (PMC10502441; doi:10.1016/j.redox.2023.102878), 2023-09-07
Supplement: mmc5.pdf [file mmc5.pdf]

**Supplementary Table 1.**

Complete set of differentially expressed genes comparing the effect of basal to high glucose in the DMSO control HepG2 cells.

| Gene Symbol  | Ensembl ID      | BG DMSO vs HG DMSO       |                     |
|--------------|-----------------|--------------------------|---------------------|
|              |                 | Fold <sup>1</sup> Change | qvalue <sup>2</sup> |
| ADAMTS4      | ENSG00000158859 | -1.57                    | 0.05                |
| ADAMTSL4-AS1 | ENSG00000203804 | -1.75                    | 0.02                |
| AL020996.3   | ENSG00000272478 | -1.95                    | 0.03                |
| AL162431.2   | ENSG00000243155 | -1.96                    | 0.04                |
| AL445524.1   | ENSG00000233461 | 2.61                     | 0.03                |
| ANGPTL4      | ENSG00000167772 | -2.05                    | 0.02                |
| ANGPTL8      | ENSG00000130173 | 4.09                     | 0.00                |
| ANKRD1       | ENSG00000148677 | -1.84                    | 0.04                |
| AOC3         | ENSG00000131471 | 1.54                     | 0.01                |
| AP006285.1   | ENSG00000227306 | 4.54                     | 0.01                |
| AQP3         | ENSG00000165272 | -2.50                    | 0.01                |
| ARC          | ENSG00000198576 | -10.27                   | 0.05                |
| ARRDC4       | ENSG00000140450 | 7.16                     | 0.00                |
| BIRC7        | ENSG00000101197 | -2.09                    | 0.02                |
| BTG2         | ENSG00000159388 | 1.88                     | 0.01                |
| C10orf10     | ENSG00000165507 | 2.47                     | 0.00                |
| C21orf58     | ENSG00000160298 | -1.76                    | 0.04                |
| C2CD2L       | ENSG00000172375 | -1.65                    | 0.01                |
| CBX4         | ENSG00000141582 | -1.53                    | 0.02                |
| CBY1         | ENSG00000100211 | 1.38                     | 0.04                |
| CEP170B      | ENSG00000099814 | -1.52                    | 0.01                |
| CLDN14       | ENSG00000159261 | 2.45                     | 0.05                |
| CLK1         | ENSG0000013441  | -1.44                    | 0.02                |
| CTH          | ENSG00000116761 | -1.97                    | 0.03                |
| DBH-AS1      | ENSG00000225756 | 1.72                     | 0.01                |
| DCBLD1       | ENSG00000164465 | -1.32                    | 0.03                |
| DDIT3        | ENSG00000175197 | -4.33                    | 0.00                |
| DDIT4        | ENSG00000168209 | -2.44                    | 0.01                |
| DEPDC7       | ENSG00000121690 | 1.65                     | 0.02                |
| DNMT3L       | ENSG00000142182 | 30.65                    | 0.03                |
| DUSP1        | ENSG00000120129 | -2.30                    | 0.00                |
| DUSP12       | ENSG00000081721 | -1.70                    | 0.01                |
| DUSP5        | ENSG00000138166 | -1.87                    | 0.01                |
| EEF1A2       | ENSG00000101210 | 2.37                     | 0.04                |
| EGLN1        | ENSG00000135766 | -1.69                    | 0.01                |
| EGR1         | ENSG00000120738 | -1.64                    | 0.02                |
| EGR3         | ENSG00000179388 | -3.92                    | 0.01                |

|          |                 |        |      |
|----------|-----------------|--------|------|
| EIF1AD   | ENSG00000175376 | 1.44   | 0.04 |
| EIF4A2   | ENSG00000156976 | -1.59  | 0.01 |
| ELF3     | ENSG00000163435 | -1.93  | 0.00 |
| EMP2     | ENSG00000213853 | 1.69   | 0.01 |
| EPC1     | ENSG00000120616 | -1.38  | 0.03 |
| EPC2     | ENSG00000135999 | -1.64  | 0.02 |
| ERRF1    | ENSG00000116285 | -2.16  | 0.00 |
| F2RL1    | ENSG00000164251 | -1.97  | 0.00 |
| FAM47E   | ENSG00000189157 | -1.35  | 0.04 |
| FAM99B   | ENSG00000205865 | 6.06   | 0.01 |
| FOXP4    | ENSG00000137166 | -1.40  | 0.05 |
| FOXQ1    | ENSG00000164379 | -1.66  | 0.01 |
| FXSD2    | ENSG00000137731 | 1.59   | 0.04 |
| G6PC     | ENSG00000131482 | 6.19   | 0.00 |
| GDF15    | ENSG00000130513 | -1.78  | 0.03 |
| GPATCH1  | ENSG00000076650 | -1.56  | 0.04 |
| GRB10    | ENSG00000106070 | -1.56  | 0.01 |
| H1FO     | ENSG00000189060 | -1.54  | 0.04 |
| HGFAC    | ENSG00000109758 | 1.51   | 0.03 |
| HIC1     | ENSG00000177374 | -13.63 | 0.03 |
| HK2      | ENSG00000159399 | -1.67  | 0.04 |
| HPCAL1   | ENSG00000115756 | -1.64  | 0.03 |
| IGFBP3   | ENSG00000146674 | -2.48  | 0.02 |
| IL11     | ENSG00000095752 | -3.03  | 0.00 |
| IL1RN    | ENSG00000136689 | 1.60   | 0.01 |
| INHBB    | ENSG00000163083 | -2.13  | 0.02 |
| ITPRIP   | ENSG00000148841 | -1.93  | 0.00 |
| JAG1     | ENSG00000101384 | -1.96  | 0.01 |
| JUN      | ENSG00000177606 | -1.59  | 0.02 |
| KALRN    | ENSG00000160145 | -1.58  | 0.02 |
| KBTBD4   | ENSG00000123444 | 2.29   | 0.04 |
| KCMF1    | ENSG00000176407 | -1.85  | 0.01 |
| KDM3A    | ENSG00000115548 | -1.77  | 0.02 |
| KLF10    | ENSG00000155090 | 1.76   | 0.02 |
| KLF5     | ENSG00000102554 | -2.37  | 0.01 |
| KLHL18   | ENSG00000114648 | 1.77   | 0.01 |
| MAFA     | ENSG00000182759 | -8.95  | 0.05 |
| MAGED1   | ENSG00000179222 | 1.48   | 0.04 |
| MARVELD3 | ENSG00000140832 | 1.61   | 0.04 |
| MIDN     | ENSG00000167470 | -1.75  | 0.00 |
| MOB3A    | ENSG00000172081 | -1.63  | 0.01 |
| MXD4     | ENSG00000123933 | 1.78   | 0.04 |
| NA       | NA              | 4.42   | 0.01 |
| NA       | NA              | 4.34   | 0.01 |
| NA       | NA              | 2.56   | 0.03 |
| NA       | NA              | 2.42   | 0.03 |

|          |                 |        |      |
|----------|-----------------|--------|------|
| NA       | NA              | 2.37   | 0.03 |
| NA       | NA              | 1.76   | 0.03 |
| NA       | NA              | 1.70   | 0.04 |
| NA       | NA              | 1.58   | 0.04 |
| NA       | NA              | -2.13  | 0.04 |
| NA       | NA              | -2.64  | 0.04 |
| NA       | NA              | -7.13  | 0.05 |
| NDRG1    | ENSG00000104419 | -1.77  | 0.00 |
| NES      | ENSG00000132688 | -1.44  | 0.03 |
| NFIL3    | ENSG00000165030 | -1.83  | 0.01 |
| NKAIN4   | ENSG00000101198 | -14.99 | 0.03 |
| NKD1     | ENSG00000140807 | -1.50  | 0.01 |
| NLGN4Y   | ENSG00000165246 | -1.52  | 0.04 |
| NR1D1    | ENSG00000126368 | -1.70  | 0.03 |
| OR2I1P   | ENSG00000237988 | 2.34   | 0.04 |
| PDGFA    | ENSG00000197461 | -1.85  | 0.04 |
| PDLIM5   | ENSG00000163110 | -1.56  | 0.01 |
| PEX13    | ENSG00000162928 | -2.20  | 0.01 |
| PHLDA1   | ENSG00000139289 | -1.49  | 0.00 |
| PIGA     | ENSG00000165195 | -2.06  | 0.03 |
| PIM1     | ENSG00000137193 | -1.64  | 0.01 |
| PKLR     | ENSG00000143627 | 1.97   | 0.01 |
| PLCXD1   | ENSG00000182378 | -1.44  | 0.02 |
| PLIN2    | ENSG00000147872 | -1.63  | 0.01 |
| PPL      | ENSG00000118898 | -1.57  | 0.05 |
| PPP1R15A | ENSG00000087074 | -2.61  | 0.00 |
| PPP1R9B  | ENSG00000108819 | 1.43   | 0.03 |
| PTPRH    | ENSG00000080031 | -1.40  | 0.04 |
| RHOA     | ENSG00000116574 | -1.58  | 0.04 |
| RNF115   | ENSG00000265491 | -1.48  | 0.01 |
| RPH3AL   | ENSG00000181031 | -1.64  | 0.01 |
| SAFB2    | ENSG00000130254 | 1.33   | 0.05 |
| SERPINE1 | ENSG00000106366 | -1.70  | 0.02 |
| SESN2    | ENSG00000130766 | -1.93  | 0.02 |
| SH3RF1   | ENSG00000154447 | -1.79  | 0.03 |
| SIAH1    | ENSG00000196470 | -1.37  | 0.04 |
| SLC20A1  | ENSG00000144136 | -1.83  | 0.01 |
| SLC25A47 | ENSG00000140107 | 2.40   | 0.01 |
| SLC28A1  | ENSG00000156222 | 2.24   | 0.03 |
| SLC2A1   | ENSG00000117394 | -1.63  | 0.02 |
| SLC2A3   | ENSG00000059804 | -2.06  | 0.01 |
| SLC30A1  | ENSG00000170385 | 1.74   | 0.03 |
| SLC51A   | ENSG00000163959 | -1.79  | 0.03 |
| SMAP1    | ENSG00000112305 | -1.42  | 0.03 |
| SMLR1    | ENSG00000256162 | 1.71   | 0.01 |
| SOX8     | ENSG00000005513 | -2.58  | 0.03 |

|                |                 |        |      |
|----------------|-----------------|--------|------|
| SPRY4          | ENSG00000187678 | -1.47  | 0.02 |
| SQSTM1         | ENSG00000161011 | -1.55  | 0.01 |
| STC2           | ENSG00000113739 | -1.61  | 0.02 |
| STX10          | ENSG00000104915 | 1.80   | 0.04 |
| TIMM9          | ENSG00000100575 | -1.60  | 0.04 |
| TMC7           | ENSG00000170537 | -1.85  | 0.02 |
| TMEM260        | ENSG00000070269 | -1.76  | 0.04 |
| TNFRSF10D      | ENSG00000173530 | 1.57   | 0.02 |
| TNRC6C-<br>AS1 | ENSG00000204282 | -1.60  | 0.04 |
| TRIB1          | ENSG00000173334 | -1.38  | 0.04 |
| TRIM41         | ENSG00000146063 | 1.71   | 0.02 |
| TSPAN1         | ENSG00000117472 | 1.94   | 0.02 |
| TUBE1          | ENSG00000074935 | -2.21  | 0.03 |
| TUBGCP3        | ENSG00000126216 | -1.97  | 0.02 |
| TXNIP          | ENSG00000265972 | 11.52  | 0.00 |
| ULBP1          | ENSG00000111981 | -12.04 | 0.04 |
| VASP           | ENSG00000125753 | -1.82  | 0.00 |
| WEE1           | ENSG00000166483 | -2.56  | 0.05 |
| YPEL3          | ENSG00000090238 | 1.89   | 0.04 |
| ZFP36          | ENSG00000128016 | -2.19  | 0.01 |
| ZMAT5          | ENSG00000100319 | 2.05   | 0.03 |
| ZNF395         | ENSG00000186918 | -1.56  | 0.03 |
| ZNF48          | ENSG00000180035 | -1.61  | 0.03 |
| ZNF496         | ENSG00000162714 | -1.79  | 0.01 |
| ZNF629         | ENSG00000102870 | -1.50  | 0.04 |
| ZSCAN26        | ENSG00000197062 | -2.46  | 0.03 |
| ZSCAN9         | ENSG00000137185 | -2.26  | 0.02 |
| ZYX            | ENSG00000159840 | -1.62  | 0.04 |

<sup>1</sup>Fold change of DMSO treated cells in basal compared to DMSO treated high glucose

<sup>2</sup>adjusted p-values (q-values) were determined through Benjamini-Hochberg
