# Supplementary material for: Sulforaphane rewires central metabolism to support antioxidant response and achieve glucose homeostasis
Source: PubMed Central journal article supplement — Redox Biol. 2023 Sep 7;67:102878. doi: 10.1016/j.redox.2023.102878 (PMC10502441; doi:10.1016/j.redox.2023.102878), 2023-09-07
Supplement: mmc6.pdf [file mmc6.pdf]

**Supplementary Table 2.**

Complete set of differentially expressed genes in response to SF in the BG compared to DMSO control in HepG2 cells.

| Gene Symbol | Ensembl ID      | Basal Glucose               |                     |
|-------------|-----------------|-----------------------------|---------------------|
|             |                 | Fold <sup>1</sup><br>Change | qvalue <sup>2</sup> |
| AAAS        | ENSG00000094914 | -1.42                       | 0.03                |
| AAED1       | ENSG00000158122 | 1.8                         | 0.05                |
| AATK        | ENSG00000181409 | -1.78                       | 0.02                |
| ABALON      | ENSG00000281376 | 2.62                        | 0.02                |
| ABCA3       | ENSG00000167972 | -9.78                       | 0.00                |
| ABCB1       | ENSG00000085563 | 1.64                        | 0.00                |
| ABCB9       | ENSG00000150967 | -1.47                       | 0.03                |
| ABCC1       | ENSG00000103222 | 1.56                        | 0.01                |
| ABCC2       | ENSG00000023839 | 2.27                        | 0.00                |
| ABCC3       | ENSG00000108846 | 2.46                        | 0.00                |
| ABCC6       | ENSG00000091262 | -1.59                       | 0.00                |
| ABCC6P1     | ENSG00000256340 | -1.54                       | 0.00                |
| ABCC6P2     | ENSG00000255277 | -1.47                       | 0.03                |
| ABCE1       | ENSG00000164163 | 1.68                        | 0.01                |
| ABCG2       | ENSG00000118777 | 1.88                        | 0.00                |
| ABCG8       | ENSG00000143921 | -1.61                       | 0.01                |
| ABHD16A     | ENSG00000204427 | -1.39                       | 0.04                |
| ABHD4       | ENSG00000100439 | 2.14                        | 0.00                |
| ABR         | ENSG00000159842 | 1.52                        | 0.00                |
| AC002524.1  | ENSG00000233247 | 1.85                        | 0.03                |
| AC002546.1  | ENSG00000267194 | -5.03                       | 0.01                |
| AC004980.1  | ENSG00000205485 | 1.46                        | 0.04                |
| AC005224.4  | ENSG00000266709 | -1.34                       | 0.01                |
| AC006001.2  | ENSG00000226824 | -2.43                       | 0.02                |
| AC007249.2  | ENSG00000257135 | 1.63                        | 0.04                |
| AC007319.1  | ENSG00000224063 | -1.67                       | 0.01                |
| AC009133.1  | ENSG00000238045 | -3.36                       | 0.03                |
| AC009501.1  | ENSG00000231609 | 2.48                        | 0.04                |
| AC011043.2  | ENSG00000278198 | -1.73                       | 0.01                |
| AC022149.1  | ENSG00000269378 | 1.44                        | 0.02                |
| AC025180.1  | ENSG00000249899 | 7                           | 0.05                |
| AC073611.1  | ENSG00000257605 | 2.44                        | 0.04                |
| AC080128.1  | ENSG00000244062 | -2.10                       | 0.00                |
| AC083809.1  | ENSG00000277247 | 2.32                        | 0.00                |
| AC083841.1  | ENSG00000253196 | -2.51                       | 0.00                |
| AC090772.3  | ENSG00000265750 | -100.43                     | 0.00                |
| AC091173.1  | ENSG00000251127 | 15.49                       | 0.00                |
| AC093673.1  | ENSG00000232533 | 1.82                        | 0.01                |
| AC093768.1  | ENSG00000183199 | 1.4                         | 0.01                |

|                  |                 |       |      |
|------------------|-----------------|-------|------|
| AC093909.1       | ENSG00000180015 | 4.34  | 0.01 |
| AC098934.1       | ENSG00000214796 | -2.01 | 0.03 |
| AC098934.2       | ENSG00000234996 | -2.07 | 0.05 |
| AC100810.3       | ENSG00000282021 | 4.51  | 0.05 |
| AC104532.1       | ENSG00000267314 | -1.89 | 0.02 |
| AC104809.2       | ENSG00000233392 | -2.60 | 0.02 |
| AC106739.1       | ENSG00000274092 | 6.17  | 0.01 |
| AC108488.1       | ENSG00000242282 | 1.52  | 0.03 |
| AC111200.2       | ENSG00000231351 | -2.27 | 0.04 |
| AC113189.2       | ENSG00000262880 | -1.40 | 0.02 |
| AC137932.2       | ENSG00000261253 | 7.48  | 0.01 |
| AC141928.1       | ENSG00000250986 | -1.88 | 0.05 |
| AC239859.6       | ENSG00000277702 | 1.55  | 0.04 |
| AC243964.2       | ENSG00000266903 | -1.77 | 0.01 |
| AC243965.2       | ENSG00000275552 | 3.45  | 0.01 |
| ACADS            | ENSG00000122971 | -1.43 | 0.03 |
| ACBD7            | ENSG00000176244 | -2.91 | 0.00 |
| ACSF2            | ENSG00000167107 | -1.54 | 0.03 |
| ACSL1            | ENSG00000151726 | -1.27 | 0.04 |
| ACSL5            | ENSG00000197142 | 2.2   | 0.00 |
| ACSM2B           | ENSG00000066813 | -1.65 | 0.02 |
| ACSS1            | ENSG00000154930 | -1.84 | 0.00 |
| ACSS2            | ENSG00000131069 | -1.69 | 0.01 |
| ACTA2            | ENSG00000107796 | -2.00 | 0.01 |
| ACTR3            | ENSG00000115091 | 1.28  | 0.05 |
| ACVR1            | ENSG00000115170 | 1.57  | 0.00 |
| ACY3             | ENSG00000132744 | -3.05 | 0.00 |
| ADAM17           | ENSG00000151694 | 1.5   | 0.05 |
| ADAMTS1          | ENSG00000154734 | -5.70 | 0.00 |
| ADAMTS13         | ENSG00000160323 | -2.46 | 0.00 |
| ADAMTS4          | ENSG00000158859 | 1.79  | 0.00 |
| ADAMTSL2         | ENSG00000197859 | -1.53 | 0.02 |
| ADAMTSL4-<br>AS1 | ENSG00000203804 | 2.24  | 0.00 |
| ADCY1            | ENSG00000164742 | -2.81 | 0.01 |
| ADCY3            | ENSG00000138031 | -5.39 | 0.00 |
| ADCY6            | ENSG00000174233 | -1.48 | 0.02 |
| ADGRD1           | ENSG00000111452 | -2.71 | 0.01 |
| ADGRG1           | ENSG00000205336 | -1.85 | 0.00 |
| ADGRL1           | ENSG00000072071 | -2.99 | 0.00 |
| ADGRV1           | ENSG00000164199 | -2.62 | 0.04 |
| ADK              | ENSG00000156110 | 1.27  | 0.04 |
| ADM              | ENSG00000148926 | 1.81  | 0.04 |
| AFMID            | ENSG00000183077 | -1.45 | 0.02 |
| AFP              | ENSG00000081051 | -1.47 | 0.00 |
| AGBL5            | ENSG00000084693 | -1.41 | 0.00 |

|            |                 |          |      |
|------------|-----------------|----------|------|
| AGO2       | ENSG00000123908 | 1.66     | 0.01 |
| AGXT       | ENSG00000172482 | -2.16    | 0.00 |
| AHDC1      | ENSG00000126705 | -1.39    | 0.04 |
| AIF1L      | ENSG00000126878 | -1.77    | 0.04 |
| AK4P3      | ENSG00000233381 | 1.32     | 0.05 |
| AKAP12     | ENSG00000131016 | 2.98     | 0.00 |
| AKR1B10    | ENSG00000198074 | 11.19    | 0.00 |
| AKR1B10P1  | ENSG00000213606 | 18.82    | 0.00 |
| AKR1C1     | ENSG00000187134 | 5.14     | 0.00 |
| AKR1C2     | ENSG00000151632 | 8.19     | 0.00 |
| AKR1D1     | ENSG00000122787 | -2.53    | 0.00 |
| AKT3       | ENSG00000117020 | -56.89   | 0.00 |
| AL031058.1 | ENSG00000261189 | 2.52     | 0.00 |
| AL031587.5 | ENSG00000278948 | -1.88    | 0.01 |
| AL035425.3 | ENSG00000261409 | -1629.26 | 0.00 |
| AL109615.3 | ENSG00000237686 | -3.66    | 0.00 |
| AL121832.3 | ENSG00000275437 | -2.79    | 0.00 |
| AL121906.2 | ENSG00000275223 | 3.28     | 0.02 |
| AL157871.6 | ENSG00000259052 | -2.01    | 0.00 |
| AL161669.1 | ENSG00000259444 | -2.04    | 0.00 |
| AL161772.1 | ENSG00000278291 | 1.44     | 0.05 |
| AL353747.3 | ENSG00000231720 | -1.99    | 0.01 |
| AL365181.3 | ENSG00000272405 | 1.45     | 0.00 |
| AL365203.1 | ENSG00000229656 | 3.83     | 0.02 |
| AL391422.3 | ENSG00000270504 | 1.67     | 0.01 |
| AL445183.3 | ENSG00000236360 | 1.93     | 0.04 |
| AL451042.2 | ENSG00000227959 | 3.89     | 0.00 |
| AL590004.4 | ENSG00000260604 | 4.6      | 0.00 |
| AL590094.1 | ENSG00000233593 | -1.74    | 0.04 |
| AL590705.5 | ENSG00000254876 | -2.06    | 0.03 |
| AL845321.1 | ENSG00000228522 | 2.29     | 0.00 |
| ALAD       | ENSG00000148218 | -1.64    | 0.00 |
| ALDH18A1   | ENSG00000059573 | -1.29    | 0.02 |
| ALDH1A1    | ENSG00000165092 | 2        | 0.00 |
| ALDH1A2    | ENSG00000128918 | -14.42   | 0.00 |
| ALDH1L1    | ENSG00000144908 | 1.88     | 0.00 |
| ALDH3B1    | ENSG00000006534 | -2.51    | 0.00 |
| ALDH6A1    | ENSG00000119711 | -1.56    | 0.01 |
| ALDH7A1    | ENSG00000164904 | -1.35    | 0.02 |
| ALDH9A1    | ENSG00000143149 | -1.26    | 0.04 |
| ALOX12P2   | ENSG00000262943 | 1.7      | 0.03 |
| AMDHD1     | ENSG00000139344 | -2.04    | 0.00 |
| AMN1       | ENSG00000151743 | 1.99     | 0.01 |
| AMOT       | ENSG00000126016 | -340.14  | 0.00 |
| AMOTL1     | ENSG00000166025 | -380.04  | 0.00 |
| ANGPTL1    | ENSG00000116194 | -1.95    | 0.00 |

|                 |                 |        |      |
|-----------------|-----------------|--------|------|
| ANKRD1          | ENSG00000148677 | 1.89   | 0.01 |
| ANKRD54         | ENSG00000100124 | -1.73  | 0.03 |
| ANKRD65         | ENSG00000235098 | -1.80  | 0.01 |
| ANPEP           | ENSG00000166825 | -1.47  | 0.01 |
| ANTXR1          | ENSG00000169604 | -1.42  | 0.03 |
| ANTXR2          | ENSG00000163297 | 1.65   | 0.01 |
| ANXA2           | ENSG00000182718 | 1.45   | 0.02 |
| ANXA2P2         | ENSG00000231991 | 2.44   | 0.02 |
| ANXA4           | ENSG00000196975 | -1.33  | 0.02 |
| ANXA9           | ENSG00000143412 | -1.92  | 0.00 |
| AOC3            | ENSG00000131471 | -1.53  | 0.00 |
| AP000777.3      | ENSG00000256813 | -5.58  | 0.01 |
| AP001318.3      | ENSG00000255062 | 2.86   | 0.03 |
| APBA2           | ENSG00000034053 | -2.64  | 0.00 |
| APBB1           | ENSG00000166313 | -4.32  | 0.00 |
| APCDD1          | ENSG00000154856 | -1.89  | 0.03 |
| APOA1           | ENSG00000118137 | -1.55  | 0.03 |
| APOA4           | ENSG00000110244 | -2.01  | 0.03 |
| APOA5           | ENSG00000110243 | -1.77  | 0.00 |
| APOBEC3C        | ENSG00000244509 | -1.39  | 0.01 |
| APOBEC3G        | ENSG00000239713 | -3.36  | 0.00 |
| APOC3           | ENSG00000110245 | -2.11  | 0.00 |
| APOF            | ENSG00000175336 | -1.49  | 0.01 |
| APOH            | ENSG00000091583 | -1.48  | 0.00 |
| AQP11           | ENSG00000178301 | -2.00  | 0.00 |
| AQP3            | ENSG00000165272 | 2.36   | 0.00 |
| AQP7P1          | ENSG00000186466 | 1.88   | 0.04 |
| ARAP1           | ENSG00000186635 | -1.53  | 0.02 |
| ARAP2           | ENSG00000047365 | 2.65   | 0.03 |
| ARAP3           | ENSG00000120318 | 2.36   | 0.03 |
| AREG            | ENSG00000109321 | 2.64   | 0.00 |
| ARFGEF3         | ENSG00000112379 | 1.66   | 0.03 |
| ARHGAP33        | ENSG00000004777 | -2.97  | 0.00 |
| ARHGAP5-<br>AS1 | ENSG00000258655 | 1.67   | 0.02 |
| ARHGEF39        | ENSG00000137135 | -1.41  | 0.03 |
| ARHGEF40        | ENSG00000165801 | -1.42  | 0.00 |
| ARL10           | ENSG00000175414 | -14.83 | 0.00 |
| ARNT            | ENSG00000143437 | -1.29  | 0.04 |
| ARNT2           | ENSG00000172379 | -1.75  | 0.02 |
| ARNTL           | ENSG00000133794 | -1.59  | 0.02 |
| ARRDC4          | ENSG00000140450 | -2.46  | 0.01 |
| ARSB            | ENSG00000113273 | 2      | 0.00 |
| ARSI            | ENSG00000183876 | -2.71  | 0.00 |
| ART4            | ENSG00000111339 | -1.38  | 0.04 |
| ASAP2           | ENSG00000151693 | 2.12   | 0.00 |

|            |                 |        |      |
|------------|-----------------|--------|------|
| ASAP3      | ENSG00000088280 | -1.62  | 0.01 |
| ASB4       | ENSG00000005981 | 1.69   | 0.00 |
| ASF1A      | ENSG00000111875 | 2.27   | 0.00 |
| ASF1B      | ENSG00000105011 | -1.85  | 0.00 |
| ASIC1      | ENSG00000110881 | -2.58  | 0.01 |
| ASPH       | ENSG00000198363 | 2.36   | 0.00 |
| ASPSCR1    | ENSG00000169696 | -1.52  | 0.01 |
| ATIC       | ENSG00000138363 | 1.28   | 0.04 |
| ATP10D     | ENSG00000145246 | -1.82  | 0.01 |
| ATP1A3     | ENSG00000105409 | -51.98 | 0.00 |
| ATP6V1C1   | ENSG00000155097 | 1.33   | 0.04 |
| ATP6V1E1   | ENSG00000131100 | 1.41   | 0.01 |
| ATP6V1G1   | ENSG00000136888 | 1.36   | 0.04 |
| ATXN1      | ENSG00000124788 | 1.48   | 0.03 |
| AXL        | ENSG00000167601 | 1.78   | 0.01 |
| B4GALNT1   | ENSG00000135454 | 2.64   | 0.00 |
| B4GALNT4   | ENSG00000182272 | -1.61  | 0.01 |
| B4GALT1    | ENSG00000086062 | 1.3    | 0.01 |
| BACE1      | ENSG00000186318 | -1.44  | 0.03 |
| BAG2       | ENSG00000112208 | 2.13   | 0.00 |
| BAG3       | ENSG00000151929 | 1.32   | 0.02 |
| BAHCC1     | ENSG00000266074 | -2.03  | 0.02 |
| BAIAP2-AS1 | ENSG00000226137 | -1.74  | 0.01 |
| BAZ1A      | ENSG00000198604 | 1.69   | 0.00 |
| BBS2       | ENSG00000125124 | -1.30  | 0.03 |
| BCAM       | ENSG00000187244 | -1.96  | 0.00 |
| BCAR3      | ENSG00000137936 | 1.49   | 0.02 |
| BCAS3      | ENSG00000141376 | -1.67  | 0.00 |
| BCL2L1     | ENSG00000171552 | 1.39   | 0.04 |
| BEX1       | ENSG00000133169 | -1.51  | 0.03 |
| BEX3       | ENSG00000166681 | -1.56  | 0.01 |
| BHMT       | ENSG00000145692 | -1.95  | 0.03 |
| BHMT2      | ENSG00000132840 | 3.61   | 0.00 |
| BICC1      | ENSG00000122870 | -1.45  | 0.04 |
| BICD1      | ENSG00000151746 | 1.85   | 0.00 |
| BICDL1     | ENSG00000135127 | 1.58   | 0.03 |
| BIRC7      | ENSG00000101197 | 1.59   | 0.04 |
| BMP6       | ENSG00000153162 | -15.03 | 0.03 |
| BOK-AS1    | ENSG00000234235 | -3.63  | 0.00 |
| BRD8       | ENSG00000112983 | -1.30  | 0.03 |
| BRIX1      | ENSG00000113460 | 1.67   | 0.03 |
| BTBD11     | ENSG00000151136 | 1.66   | 0.00 |
| BTBD2      | ENSG00000133243 | -1.58  | 0.04 |
| BTG2       | ENSG00000159388 | -1.44  | 0.03 |
| BTG3       | ENSG00000154640 | 1.56   | 0.05 |
| BTN2A1     | ENSG00000112763 | 2.24   | 0.03 |

|            |                 |         |      |
|------------|-----------------|---------|------|
| BZW1P2     | ENSG00000198406 | 1.72    | 0.03 |
| BZW2       | ENSG00000136261 | 1.35    | 0.01 |
| C11orf95   | ENSG00000188070 | -2.03   | 0.00 |
| C12orf29   | ENSG00000133641 | 1.51    | 0.01 |
| C12orf49   | ENSG00000111412 | -1.29   | 0.03 |
| C14orf159  | ENSG00000133943 | -1.58   | 0.01 |
| C14orf93   | ENSG00000100802 | -1.68   | 0.02 |
| C16orf62   | ENSG00000103544 | -2.69   | 0.00 |
| C16orf95   | ENSG00000260456 | -1.53   | 0.01 |
| C17orf113  | ENSG00000267221 | -2.93   | 0.04 |
| C17orf53   | ENSG00000125319 | -1.53   | 0.03 |
| C19orf68   | ENSG00000185453 | -1.61   | 0.01 |
| C1GALT1C1L | ENSG00000223658 | -2.95   | 0.01 |
| C1orf115   | ENSG00000162817 | -1.77   | 0.00 |
| C1orf186   | ENSG00000263961 | -1.49   | 0.05 |
| C1orf210   | ENSG00000253313 | -2.95   | 0.01 |
| C1orf27    | ENSG00000157181 | 1.79    | 0.02 |
| C2         | ENSG00000166278 | -1.25   | 0.05 |
| C2CD2L     | ENSG00000172375 | 1.74    | 0.00 |
| C2orf54    | ENSG00000172478 | -8.82   | 0.00 |
| C3orf18    | ENSG00000088543 | -2.33   | 0.01 |
| C4BPB      | ENSG00000123843 | -1.54   | 0.01 |
| C4orf32    | ENSG00000174749 | 1.9     | 0.01 |
| C5orf30    | ENSG00000181751 | 1.5     | 0.02 |
| C5orf56    | ENSG00000197536 | 1.49    | 0.03 |
| C6orf132   | ENSG00000188112 | 1.65    | 0.03 |
| C7orf50    | ENSG00000146540 | 1.34    | 0.05 |
| C8orf4     | ENSG00000176907 | 1.69    | 0.02 |
| C9orf152   | ENSG00000188959 | -3.16   | 0.03 |
| CA14       | ENSG00000118298 | -2.38   | 0.01 |
| CA2        | ENSG00000104267 | -113.77 | 0.00 |
| CABIN1     | ENSG00000099991 | -1.29   | 0.03 |
| CABLES2    | ENSG00000149679 | -1.87   | 0.00 |
| CACFD1     | ENSG00000160325 | -1.45   | 0.03 |
| CACHD1     | ENSG00000158966 | -44.63  | 0.00 |
| CACNA2D4   | ENSG00000151062 | 1.52    | 0.01 |
| CADM1      | ENSG00000182985 | -1.46   | 0.05 |
| CAMK1      | ENSG00000134072 | -1.49   | 0.02 |
| CAP1       | ENSG00000131236 | 1.42    | 0.00 |
| CAPN10-AS1 | ENSG00000260942 | -1.58   | 0.01 |
| CAPN2      | ENSG00000162909 | 1.5     | 0.00 |
| CAPRIN2    | ENSG00000110888 | 1.66    | 0.02 |
| CARHSP1    | ENSG00000153048 | -2.04   | 0.00 |
| CASC19     | ENSG00000254166 | 2.07    | 0.01 |
| CASKIN1    | ENSG00000167971 | -1.78   | 0.02 |
| CASP8      | ENSG00000064012 | 1.46    | 0.02 |

|                 |                 |         |      |
|-----------------|-----------------|---------|------|
| CASP9           | ENSG00000132906 | -1.64   | 0.00 |
| CBFA2T2         | ENSG00000078699 | -1.68   | 0.00 |
| CBS             | ENSG00000160200 | -1.60   | 0.00 |
| CBSL            | ENSG00000274276 | -184.82 | 0.01 |
| CBWD2           | ENSG00000136682 | 1.44    | 0.05 |
| CBX2            | ENSG00000173894 | -1.45   | 0.01 |
| CBX7            | ENSG00000100307 | -2.22   | 0.04 |
| CCDC113         | ENSG00000103021 | -5.39   | 0.03 |
| CCDC170         | ENSG00000120262 | -1.83   | 0.05 |
| CCDC183-<br>AS1 | ENSG00000228544 | -2.00   | 0.01 |
| CCDC25          | ENSG00000147419 | -1.59   | 0.04 |
| CCDC28B         | ENSG00000160050 | -2.36   | 0.03 |
| CCDC50          | ENSG00000152492 | 1.44    | 0.02 |
| CCDC66          | ENSG00000180376 | 1.64    | 0.05 |
| CCDC88C         | ENSG00000015133 | 1.41    | 0.03 |
| CCL14           | ENSG00000276409 | 1.42    | 0.01 |
| CCNB1           | ENSG00000134057 | -1.39   | 0.02 |
| CCNB2           | ENSG00000157456 | -1.78   | 0.00 |
| CCND2           | ENSG00000118971 | -10.34  | 0.00 |
| CCPG1           | ENSG00000260916 | 2.5     | 0.00 |
| CCT2            | ENSG00000166226 | 1.28    | 0.02 |
| CCT6A           | ENSG00000146731 | 1.33    | 0.01 |
| CCT8            | ENSG00000156261 | 1.34    | 0.02 |
| CD109           | ENSG00000156535 | 2.04    | 0.01 |
| CD3EAP          | ENSG00000117877 | 1.97    | 0.01 |
| CD4             | ENSG00000010610 | -1.84   | 0.00 |
| CD58            | ENSG00000116815 | 1.81    | 0.00 |
| CD7             | ENSG00000173762 | -1.80   | 0.04 |
| CD74            | ENSG00000019582 | -1.57   | 0.00 |
| CD83            | ENSG00000112149 | -1.46   | 0.04 |
| CDC123          | ENSG00000151465 | 1.33    | 0.03 |
| CDC20           | ENSG00000117399 | -1.62   | 0.00 |
| CDC25C          | ENSG00000158402 | -1.85   | 0.00 |
| CDC42EP4        | ENSG00000179604 | -2.50   | 0.00 |
| CDC73           | ENSG00000134371 | 1.39    | 0.03 |
| CDCA3           | ENSG00000111665 | -1.33   | 0.03 |
| CDCA7L          | ENSG00000164649 | -1.53   | 0.02 |
| CDCA8           | ENSG00000134690 | -1.55   | 0.00 |
| CDH16           | ENSG00000166589 | -1.68   | 0.03 |
| CDHR5           | ENSG00000099834 | -2.23   | 0.03 |
| CDK16           | ENSG00000102225 | -1.38   | 0.04 |
| CDKN1A          | ENSG00000124762 | 1.63    | 0.01 |
| CDKN2B          | ENSG00000147883 | 3.21    | 0.00 |
| CDKN2C          | ENSG00000123080 | -1.67   | 0.01 |
| CDKN3           | ENSG00000100526 | -1.34   | 0.02 |

|           |                 |         |      |
|-----------|-----------------|---------|------|
| CDO1      | ENSG00000129596 | -2.23   | 0.00 |
| CDR2      | ENSG00000140743 | 1.38    | 0.00 |
| CDT1      | ENSG00000167513 | -1.57   | 0.02 |
| CEBPA     | ENSG00000245848 | -2.71   | 0.00 |
| CEBPB     | ENSG00000172216 | 2.51    | 0.05 |
| CEBPZ     | ENSG00000115816 | 1.43    | 0.03 |
| CECR2     | ENSG00000099954 | -155.42 | 0.00 |
| CELSR1    | ENSG00000075275 | -4.08   | 0.00 |
| CEP131    | ENSG00000141577 | -1.52   | 0.01 |
| CEP170B   | ENSG00000099814 | 1.41    | 0.01 |
| CES1      | ENSG00000198848 | 1.65    | 0.00 |
| CES1P1    | ENSG00000228695 | 8.99    | 0.00 |
| CGN       | ENSG00000143375 | -3.18   | 0.01 |
| CGNL1     | ENSG00000128849 | -1.39   | 0.03 |
| CHD3      | ENSG00000170004 | -1.57   | 0.00 |
| CHMP1B    | ENSG00000255112 | 1.3     | 0.01 |
| CHMP4C    | ENSG00000164695 | 1.52    | 0.02 |
| CHORDC1   | ENSG00000110172 | 1.78    | 0.01 |
| CHPF2     | ENSG00000033100 | 1.57    | 0.00 |
| CHST13    | ENSG00000180767 | -1.66   | 0.03 |
| CHST3     | ENSG00000122863 | -1.57   | 0.00 |
| CHTF18    | ENSG00000127586 | -1.66   | 0.03 |
| CIB2      | ENSG00000136425 | -1.92   | 0.02 |
| CIT       | ENSG00000122966 | -1.52   | 0.01 |
| CITED2    | ENSG00000164442 | -1.47   | 0.01 |
| CKMT1A    | ENSG00000223572 | -4.20   | 0.00 |
| CKMT1B    | ENSG00000237289 | -3.16   | 0.01 |
| CLDN14    | ENSG00000159261 | -3.25   | 0.00 |
| CLDN19    | ENSG00000164007 | -3.10   | 0.00 |
| CLDN9     | ENSG00000213937 | -3.94   | 0.00 |
| CLIC3     | ENSG00000169583 | -3.84   | 0.01 |
| CLSTN3    | ENSG00000139182 | -1.34   | 0.05 |
| CLU       | ENSG00000120885 | -1.44   | 0.03 |
| CMAS      | ENSG00000111726 | 1.37    | 0.03 |
| CMTM6     | ENSG00000091317 | 1.49    | 0.04 |
| CNPY1     | ENSG00000146910 | -1.58   | 0.03 |
| CNTD2     | ENSG00000105219 | -1.82   | 0.01 |
| CNTNAP2   | ENSG00000174469 | -2.89   | 0.01 |
| CNTNAP3   | ENSG00000106714 | 1.96    | 0.03 |
| CNTNAP3B  | ENSG00000154529 | 4.69    | 0.00 |
| CNTNAP3P2 | ENSG00000276386 | 2.34    | 0.02 |
| COA7      | ENSG00000162377 | 1.24    | 0.03 |
| COL2A1    | ENSG00000139219 | -3.29   | 0.00 |
| COL4A2    | ENSG00000134871 | -5.13   | 0.00 |
| COL4A6    | ENSG00000197565 | -1.38   | 0.02 |
| COL6A1    | ENSG00000142156 | -1.41   | 0.01 |



|            |                 |       |      |
|------------|-----------------|-------|------|
| COL6A2     | ENSG00000142173 | -3.03 | 0.00 |
| COLEC12    | ENSG00000158270 | -6.50 | 0.03 |
| COLGALT2   | ENSG00000198756 | 1.57  | 0.00 |
| COQ5       | ENSG00000110871 | -1.68 | 0.00 |
| CORO2A     | ENSG00000106789 | -1.35 | 0.01 |
| CORO2B     | ENSG00000103647 | 2.74  | 0.00 |
| COTL1      | ENSG00000103187 | 1.55  | 0.01 |
| CPEB4      | ENSG00000113742 | 2.5   | 0.04 |
| CPED1      | ENSG00000106034 | 1.56  | 0.01 |
| CPLX1      | ENSG00000168993 | 1.96  | 0.02 |
| CPLX2      | ENSG00000145920 | 5     | 0.00 |
| CPT1A      | ENSG00000110090 | 1.71  | 0.00 |
| CRAT       | ENSG00000095321 | -1.56 | 0.03 |
| CREB3L4    | ENSG00000143578 | -1.73 | 0.01 |
| CRIP1      | ENSG00000213145 | -2.11 | 0.01 |
| CRIP2      | ENSG00000182809 | -2.20 | 0.00 |
| CRYL1      | ENSG00000165475 | -1.57 | 0.02 |
| CSF3R      | ENSG00000119535 | -1.46 | 0.02 |
| CSGALNACT2 | ENSG00000169826 | 2.5   | 0.00 |
| CSRP1      | ENSG00000159176 | -1.62 | 0.03 |
| CSRP2      | ENSG00000175183 | -1.66 | 0.03 |
| CTDSP1     | ENSG00000144579 | -2.19 | 0.02 |
| CTDSP2     | ENSG00000175215 | -1.23 | 0.05 |
| CTNNBIP1   | ENSG00000178585 | -1.47 | 0.04 |
| CTPS1      | ENSG00000171793 | 1.37  | 0.01 |
| CTSL       | ENSG00000135047 | 1.45  | 0.02 |
| CTSS       | ENSG00000163131 | -2.41 | 0.02 |
| CTSV       | ENSG00000136943 | -1.85 | 0.00 |
| CTTN       | ENSG00000085733 | 1.53  | 0.01 |
| CXCL8      | ENSG00000169429 | 3.82  | 0.00 |
| CYB561     | ENSG00000008283 | -2.36 | 0.00 |
| CYCSP6     | ENSG00000214429 | 1.55  | 0.02 |
| CYP24A1    | ENSG00000019186 | 3.37  | 0.00 |
| CYP27A1    | ENSG00000135929 | -1.45 | 0.05 |
| CYP2J2     | ENSG00000134716 | 1.57  | 0.03 |
| CYP2U1     | ENSG00000155016 | -1.49 | 0.02 |
| CYP4F11    | ENSG00000171903 | 3.13  | 0.00 |
| CYP4F12    | ENSG00000186204 | -1.57 | 0.01 |
| CYP4F3     | ENSG00000186529 | 1.76  | 0.01 |
| CYP8B1     | ENSG00000180432 | -1.83 | 0.01 |
| CYR61      | ENSG00000142871 | 2.03  | 0.01 |
| CYTOR      | ENSG00000222041 | 1.53  | 0.02 |
| DAGLA      | ENSG00000134780 | 1.51  | 0.01 |
| DAPK1      | ENSG00000196730 | -1.46 | 0.01 |
| DBI        | ENSG00000155368 | -1.37 | 0.04 |
| DBNDD1     | ENSG00000003249 | 1.49  | 0.03 |

|         |                 |         |      |
|---------|-----------------|---------|------|
| DBP     | ENSG00000105516 | -2.68   | 0.01 |
| DCAF13  | ENSG00000164934 | 1.51    | 0.00 |
| DCBLD1  | ENSG00000164465 | 1.38    | 0.00 |
| DCBLD2  | ENSG00000057019 | 1.76    | 0.00 |
| DCP1B   | ENSG00000151065 | -1.43   | 0.01 |
| DDB2    | ENSG00000134574 | -1.93   | 0.01 |
| DDIT3   | ENSG00000175197 | 1.82    | 0.03 |
| DDR2    | ENSG00000162733 | -18.13  | 0.00 |
| DDX18   | ENSG00000088205 | 1.51    | 0.01 |
| DDX21   | ENSG00000165732 | 1.84    | 0.02 |
| DDX31   | ENSG00000125485 | 1.34    | 0.03 |
| DENND3  | ENSG00000105339 | -1.74   | 0.03 |
| DENND4A | ENSG00000174485 | 1.65    | 0.05 |
| DESI1   | ENSG00000100418 | 1.38    | 0.01 |
| DGAT1   | ENSG00000185000 | -1.80   | 0.01 |
| DGAT2   | ENSG00000062282 | -1.80   | 0.02 |
| DGKK    | ENSG00000274588 | -2.11   | 0.00 |
| DHRS2   | ENSG00000100867 | -1.99   | 0.01 |
| DHTKD1  | ENSG00000181192 | -1.68   | 0.01 |
| DIMT1   | ENSG00000086189 | 1.41    | 0.04 |
| DIRC2   | ENSG00000138463 | 1.35    | 0.03 |
| DMTN    | ENSG00000158856 | -1.44   | 0.00 |
| DNAJA2  | ENSG00000069345 | 1.39    | 0.02 |
| DNAJB11 | ENSG00000090520 | 1.49    | 0.01 |
| DNAJB5  | ENSG00000137094 | -2.06   | 0.02 |
| DNAJB9  | ENSG00000128590 | 1.97    | 0.00 |
| DNAJC10 | ENSG00000077232 | 1.65    | 0.02 |
| DNAJC2  | ENSG00000105821 | 1.48    | 0.03 |
| DNAJC25 | ENSG00000059769 | 1.5     | 0.03 |
| DNAJC3  | ENSG00000102580 | 1.59    | 0.03 |
| DNASE2  | ENSG00000105612 | -1.43   | 0.04 |
| DND1    | ENSG00000256453 | 1.47    | 0.01 |
| DOCK11  | ENSG00000147251 | -326.29 | 0.00 |
| DOK1    | ENSG00000115325 | -3.05   | 0.02 |
| DPEP1   | ENSG00000015413 | -2.25   | 0.00 |
| DPYSL3  | ENSG00000113657 | -15.78  | 0.00 |
| DPYSL5  | ENSG00000157851 | -146.02 | 0.00 |
| DQX1    | ENSG00000144045 | -1.38   | 0.02 |
| DRC7    | ENSG00000159625 | -6.36   | 0.01 |
| DSC3    | ENSG00000134762 | -17.39  | 0.02 |
| DSE     | ENSG00000111817 | -3.73   | 0.00 |
| DTNB    | ENSG00000138101 | -1.54   | 0.02 |
| DTX4    | ENSG00000110042 | -4.08   | 0.03 |
| DUSP10  | ENSG00000143507 | -2.00   | 0.01 |
| DUSP13  | ENSG00000079393 | 5.63    | 0.00 |
| DUSP4   | ENSG00000120875 | 2.09    | 0.03 |

|           |                 |         |      |
|-----------|-----------------|---------|------|
| DUSP5     | ENSG00000138166 | 2.19    | 0.00 |
| DUSP6     | ENSG00000139318 | 1.51    | 0.01 |
| DUSP9     | ENSG00000130829 | -1.71   | 0.00 |
| DUXAP9    | ENSG00000225210 | 2.14    | 0.04 |
| DYNC2H1   | ENSG00000187240 | -98.36  | 0.01 |
| DYSF      | ENSG00000135636 | -6.23   | 0.00 |
| EBF4      | ENSG00000088881 | -3.78   | 0.01 |
| EBNA1BP2  | ENSG00000117395 | 1.56    | 0.01 |
| EDN1      | ENSG00000078401 | 2.24    | 0.01 |
| EEF1A2    | ENSG00000101210 | -2.93   | 0.00 |
| EEF1AKMT3 | ENSG00000123427 | 1.74    | 0.00 |
| EFCAB12   | ENSG00000172771 | -2.36   | 0.02 |
| EFNB1     | ENSG00000090776 | -1.61   | 0.00 |
| EGLN3     | ENSG00000129521 | 1.99    | 0.01 |
| EGR1      | ENSG00000120738 | 2.29    | 0.00 |
| EHMT2     | ENSG00000204371 | -1.64   | 0.01 |
| EID3      | ENSG00000255150 | 39.7    | 0.00 |
| EIF2S1    | ENSG00000134001 | 1.6     | 0.00 |
| EIF2S2    | ENSG00000125977 | 1.31    | 0.04 |
| EIF2S2P4  | ENSG00000128692 | 1.5     | 0.04 |
| ELF3      | ENSG00000163435 | -1.35   | 0.04 |
| ELOA      | ENSG00000011007 | 1.44    | 0.01 |
| ELOVL4    | ENSG00000118402 | -27.10  | 0.02 |
| EMC7      | ENSG00000134153 | 1.41    | 0.02 |
| EMILIN3   | ENSG00000183798 | -6.50   | 0.01 |
| EML1      | ENSG00000066629 | -4.14   | 0.00 |
| EMP2      | ENSG00000213853 | -1.74   | 0.00 |
| ENO3      | ENSG00000108515 | -2.25   | 0.00 |
| ENPP1     | ENSG00000197594 | 1.73    | 0.01 |
| ENPP2     | ENSG00000136960 | -3.92   | 0.00 |
| EP300-AS1 | ENSG00000231993 | -2.11   | 0.05 |
| EPB41L3   | ENSG00000082397 | -168.90 | 0.00 |
| EPB41L5   | ENSG00000115109 | 1.49    | 0.00 |
| EPHA1     | ENSG00000146904 | -1.51   | 0.02 |
| EPHA4     | ENSG00000116106 | -198.09 | 0.00 |
| EPHB4     | ENSG00000196411 | -1.61   | 0.00 |
| EPHX1     | ENSG00000143819 | 2.03    | 0.00 |
| EPHX2     | ENSG00000120915 | -1.99   | 0.00 |
| EPO       | ENSG00000130427 | -2.25   | 0.00 |
| EPOR      | ENSG00000187266 | -1.87   | 0.00 |
| EPS8L3    | ENSG00000198758 | 1.3     | 0.03 |
| ERBB2     | ENSG00000141736 | -2.06   | 0.00 |
| ERCC1     | ENSG00000012061 | 1.39    | 0.03 |
| ERN1      | ENSG00000178607 | 2.01    | 0.00 |
| ERP27     | ENSG00000139055 | -2.83   | 0.00 |
| ERRFI1    | ENSG00000116285 | 2.04    | 0.00 |

|          |                 |         |      |
|----------|-----------------|---------|------|
| ESAM     | ENSG00000149564 | 2.12    | 0.02 |
| ESPL1    | ENSG00000135476 | -1.54   | 0.02 |
| ETNK2    | ENSG00000143845 | -2.51   | 0.00 |
| ETS2     | ENSG00000157557 | 1.3     | 0.01 |
| EVC      | ENSG00000072840 | -1.54   | 0.02 |
| EVL      | ENSG00000196405 | -1.47   | 0.02 |
| F2RL1    | ENSG00000164251 | 2.34    | 0.00 |
| F3       | ENSG00000117525 | 1.62    | 0.03 |
| F7       | ENSG00000057593 | -1.84   | 0.03 |
| FABP1    | ENSG00000163586 | -1.96   | 0.00 |
| FABP5    | ENSG00000164687 | 1.67    | 0.00 |
| FADS1    | ENSG00000149485 | -1.29   | 0.03 |
| FAHD2A   | ENSG00000115042 | -1.44   | 0.02 |
| FAM102A  | ENSG00000167106 | -2.17   | 0.00 |
| FAM102B  | ENSG00000162636 | -2.45   | 0.01 |
| FAM107B  | ENSG00000065809 | 1.46    | 0.02 |
| FAM109A  | ENSG00000198324 | 1.49    | 0.01 |
| FAM111A  | ENSG00000166801 | -1.58   | 0.01 |
| FAM117A  | ENSG00000121104 | -1.62   | 0.00 |
| FAM129A  | ENSG00000135842 | -34.06  | 0.00 |
| FAM151A  | ENSG00000162391 | -4.23   | 0.01 |
| FAM171A2 | ENSG00000161682 | -2.00   | 0.01 |
| FAM171B  | ENSG00000144369 | -30.91  | 0.01 |
| FAM20C   | ENSG00000177706 | -1.67   | 0.01 |
| FAM222A  | ENSG00000139438 | -1.97   | 0.00 |
| FAM3B    | ENSG00000183844 | -1.66   | 0.00 |
| FAM43B   | ENSG00000183114 | -1.80   | 0.02 |
| FAM46C   | ENSG00000183508 | -5.66   | 0.05 |
| FAM69A   | ENSG00000154511 | 1.54    | 0.02 |
| FAM69B   | ENSG00000165716 | -2.55   | 0.00 |
| FAM83D   | ENSG00000101447 | -1.44   | 0.01 |
| FAM98A   | ENSG00000119812 | 1.54    | 0.04 |
| FARSB    | ENSG00000116120 | 1.31    | 0.01 |
| FAT3     | ENSG00000165323 | -209.38 | 0.00 |
| FAXDC2   | ENSG00000170271 | -1.69   | 0.02 |
| FBLN5    | ENSG00000140092 | -2.53   | 0.05 |
| FBN1     | ENSG00000166147 | -3.97   | 0.00 |
| FBN2     | ENSG00000138829 | -136.24 | 0.00 |
| FBXL16   | ENSG00000127585 | -1.57   | 0.05 |
| FBXO30   | ENSG00000118496 | 1.72    | 0.05 |
| FBXO6    | ENSG00000116663 | -1.89   | 0.02 |
| FDFT1    | ENSG00000079459 | -1.28   | 0.02 |
| FECH     | ENSG00000066926 | 1.54    | 0.02 |
| FERMT1   | ENSG00000101311 | 1.57    | 0.04 |
| FGB      | ENSG00000171564 | -1.42   | 0.02 |
| FGD3     | ENSG00000127084 | -1.83   | 0.04 |

|            |                 |         |      |
|------------|-----------------|---------|------|
| FGFR2      | ENSG00000066468 | -5.98   | 0.00 |
| FGFR3      | ENSG00000068078 | -1.67   | 0.00 |
| FHL1       | ENSG00000022267 | -515.56 | 0.00 |
| FHL3       | ENSG00000183386 | 1.68    | 0.01 |
| FICD       | ENSG00000198855 | 1.44    | 0.04 |
| FILIP1L    | ENSG00000168386 | 2.45    | 0.00 |
| FKBP4      | ENSG00000004478 | 1.4     | 0.01 |
| FKBP9      | ENSG00000122642 | 1.46    | 0.02 |
| FLNC       | ENSG00000128591 | -205.07 | 0.00 |
| FLRT3      | ENSG00000125848 | 1.7     | 0.02 |
| FLT4       | ENSG00000037280 | -80.45  | 0.00 |
| FLVCR1     | ENSG00000162769 | -2.27   | 0.02 |
| FLVCR1-AS1 | ENSG00000198468 | -1.73   | 0.00 |
| FN3K       | ENSG00000167363 | -1.59   | 0.01 |
| FNDC10     | ENSG00000228594 | -1.46   | 0.03 |
| FOPNL      | ENSG00000133393 | 1.63    | 0.03 |
| FOSL1      | ENSG00000175592 | 2.86    | 0.00 |
| FOXC1      | ENSG00000054598 | -2.03   | 0.01 |
| FOXM1      | ENSG00000111206 | -1.44   | 0.02 |
| FOXO4      | ENSG00000184481 | -1.56   | 0.03 |
| FOXP4      | ENSG00000137166 | -1.48   | 0.00 |
| FOXQ1      | ENSG00000164379 | 1.75    | 0.00 |
| FSCN1      | ENSG00000075618 | -1.80   | 0.01 |
| FST        | ENSG00000134363 | 1.99    | 0.00 |
| FSTL1      | ENSG00000163430 | -74.03  | 0.01 |
| FSTL4      | ENSG00000053108 | -2.38   | 0.01 |
| FTH1P11    | ENSG00000237264 | 1.82    | 0.04 |
| FTH1P2     | ENSG00000234975 | 1.75    | 0.01 |
| FTL        | ENSG00000087086 | 2.36    | 0.00 |
| FTLP3      | ENSG00000226608 | 2.64    | 0.00 |
| FXYD1      | ENSG00000266964 | -1.49   | 0.03 |
| FZD1       | ENSG00000157240 | -2.11   | 0.00 |
| FZR1       | ENSG00000105325 | -1.65   | 0.01 |
| GAB2       | ENSG00000033327 | 1.37    | 0.03 |
| GABRE      | ENSG00000102287 | 2.41    | 0.00 |
| GADD45B    | ENSG00000099860 | 1.85    | 0.04 |
| GALK1      | ENSG00000108479 | -1.93   | 0.01 |
| GALM       | ENSG00000143891 | -1.47   | 0.01 |
| GALNT11    | ENSG00000178234 | -1.39   | 0.01 |
| GALNT16    | ENSG00000100626 | -3.32   | 0.01 |
| GALNT6     | ENSG00000139629 | -2.68   | 0.00 |
| GALT       | ENSG00000213930 | -1.65   | 0.02 |
| GANC       | ENSG00000214013 | -1.31   | 0.03 |
| GAR1       | ENSG00000109534 | 1.47    | 0.03 |
| GAREM1     | ENSG00000141441 | 1.59    | 0.03 |
| GAREM2     | ENSG00000157833 | -2.04   | 0.00 |

|         |                 |         |      |
|---------|-----------------|---------|------|
| GART    | ENSG00000159131 | 1.36    | 0.01 |
| GAS2    | ENSG00000148935 | 1.48    | 0.01 |
| GAS7    | ENSG00000007237 | -2.10   | 0.00 |
| GATA6   | ENSG00000141448 | -1.78   | 0.01 |
| GATAD2A | ENSG00000167491 | 1.22    | 0.02 |
| GBE1    | ENSG00000114480 | 1.62    | 0.01 |
| GCHFR   | ENSG00000137880 | -1.40   | 0.03 |
| GCKR    | ENSG00000084734 | 2.39    | 0.00 |
| GCLC    | ENSG00000001084 | 4.17    | 0.00 |
| GCLM    | ENSG00000023909 | 5.99    | 0.00 |
| GCNT1   | ENSG00000187210 | -2.17   | 0.03 |
| GDF11   | ENSG00000135414 | -1.92   | 0.00 |
| GDF15   | ENSG00000130513 | 2.45    | 0.00 |
| GDF7    | ENSG00000143869 | -2.31   | 0.00 |
| GDPD3   | ENSG00000102886 | -1.53   | 0.03 |
| GDPD5   | ENSG00000158555 | -2.33   | 0.00 |
| GFPT2   | ENSG00000131459 | -17.63  | 0.01 |
| GGT5    | ENSG00000099998 | 2.58    | 0.00 |
| GHITM   | ENSG00000165678 | 1.48    | 0.00 |
| GJA1    | ENSG00000152661 | -37.79  | 0.00 |
| GJC2    | ENSG00000198835 | -2.62   | 0.00 |
| GK      | ENSG00000198814 | 1.47    | 0.03 |
| GLA     | ENSG00000102393 | 1.72    | 0.00 |
| GLB1L2  | ENSG00000149328 | -1.79   | 0.01 |
| GLDC    | ENSG00000178445 | -1.41   | 0.00 |
| GLIPR1  | ENSG00000139278 | 2.39    | 0.00 |
| GLIS2   | ENSG00000126603 | -3.34   | 0.03 |
| GLRX    | ENSG00000173221 | 1.33    | 0.05 |
| GLRX3   | ENSG00000108010 | 1.59    | 0.01 |
| GLS     | ENSG00000115419 | 1.66    | 0.04 |
| GLT8D1  | ENSG00000016864 | -1.42   | 0.01 |
| GLUD1   | ENSG00000148672 | -1.39   | 0.00 |
| GLYCTK  | ENSG00000168237 | -1.89   | 0.01 |
| GM2A    | ENSG00000196743 | -1.35   | 0.04 |
| GNAI2   | ENSG00000114353 | -1.52   | 0.05 |
| GNG12   | ENSG00000172380 | -13.00  | 0.00 |
| GNG7    | ENSG00000176533 | -2.28   | 0.00 |
| GNL3    | ENSG00000163938 | 1.3     | 0.04 |
| GNMT    | ENSG00000124713 | -7.01   | 0.00 |
| GNPDA1  | ENSG00000113552 | 1.47    | 0.01 |
| GNS     | ENSG00000135677 | 1.29    | 0.03 |
| GOLM1   | ENSG00000135052 | -1.92   | 0.02 |
| GPAT3   | ENSG00000138678 | 5.51    | 0.00 |
| GPC4    | ENSG00000076716 | -107.63 | 0.00 |
| GPCPD1  | ENSG00000125772 | 1.53    | 0.03 |
| GPD1    | ENSG00000167588 | 1.65    | 0.00 |

|           |                 |         |      |
|-----------|-----------------|---------|------|
| GPER1     | ENSG00000164850 | -1.71   | 0.02 |
| GPM6B     | ENSG00000046653 | -5.39   | 0.02 |
| GPNMB     | ENSG00000136235 | 2.29    | 0.02 |
| GPR180    | ENSG00000152749 | -216.77 | 0.00 |
| GPT       | ENSG00000167701 | -2.13   | 0.02 |
| GPX2      | ENSG00000176153 | 1.99    | 0.04 |
| GRAP      | ENSG00000154016 | 2.27    | 0.02 |
| GRB7      | ENSG00000141738 | -1.99   | 0.00 |
| GREB1     | ENSG00000196208 | -1.40   | 0.04 |
| GREB1L    | ENSG00000141449 | -16.68  | 0.00 |
| GRSF1     | ENSG00000132463 | 1.21    | 0.04 |
| GSK3A     | ENSG00000105723 | -1.42   | 0.05 |
| GSKIP     | ENSG00000100744 | 1.71    | 0.00 |
| GSN       | ENSG00000148180 | -1.61   | 0.01 |
| GSPT1     | ENSG00000103342 | 1.32    | 0.05 |
| GSR       | ENSG00000104687 | 2.24    | 0.00 |
| GSTA7P    | ENSG00000237674 | 1.92    | 0.03 |
| GSTM4     | ENSG00000168765 | -1.46   | 0.03 |
| GSTO1     | ENSG00000148834 | 1.5     | 0.01 |
| GTF2IP20  | ENSG00000272645 | -1.52   | 0.04 |
| GTPBP4    | ENSG00000107937 | 1.39    | 0.00 |
| H1FX      | ENSG00000184897 | -1.67   | 0.01 |
| H2AFJ     | ENSG00000246705 | -1.39   | 0.05 |
| H2AFV     | ENSG00000105968 | -1.88   | 0.00 |
| H2AFY2    | ENSG00000099284 | -1.67   | 0.00 |
| HAAO      | ENSG00000162882 | -1.92   | 0.01 |
| HADH      | ENSG00000138796 | -1.48   | 0.01 |
| HAP1      | ENSG00000173805 | -12.21  | 0.02 |
| HBEGF     | ENSG00000113070 | 1.45    | 0.04 |
| HCCS      | ENSG00000004961 | 1.29    | 0.03 |
| HDAC5     | ENSG00000108840 | -2.50   | 0.00 |
| HDAC6     | ENSG00000094631 | -1.51   | 0.00 |
| HDDC2     | ENSG00000111906 | 1.45    | 0.04 |
| HEPACAM   | ENSG00000165478 | -1.92   | 0.03 |
| HEXB      | ENSG00000049860 | 1.38    | 0.03 |
| HEXDC     | ENSG00000169660 | -1.65   | 0.01 |
| HGD       | ENSG00000113924 | 1.39    | 0.00 |
| HHAT      | ENSG00000054392 | -1.67   | 0.00 |
| HIC1      | ENSG00000177374 | 14.77   | 0.00 |
| HIST1H1C  | ENSG00000187837 | -2.81   | 0.04 |
| HIST1H2AI | ENSG00000196747 | -7.84   | 0.00 |
| HIST1H2AJ | ENSG00000276368 | -6.54   | 0.00 |
| HIST1H2BC | ENSG00000180596 | -4.99   | 0.00 |
| HIST1H2BD | ENSG00000158373 | -8.17   | 0.00 |
| HIST1H2BJ | ENSG00000124635 | -127.12 | 0.03 |
| HIST1H2BK | ENSG00000197903 | -5.66   | 0.00 |

|            |                 |         |      |
|------------|-----------------|---------|------|
| HIST1H2BL  | ENSG00000185130 | -9.13   | 0.01 |
| HIST1H2BN  | ENSG00000233822 | -2.53   | 0.03 |
| HIST1H2BO  | ENSG00000274641 | -16.68  | 0.01 |
| HIST1H3D   | ENSG00000282988 | -9.38   | 0.00 |
| HIST1H3J   | ENSG00000197153 | -12.82  | 0.01 |
| HIST1H4J   | ENSG00000197238 | -3.16   | 0.00 |
| HIST1H4K   | ENSG00000273542 | -3.01   | 0.00 |
| HIST2H2AA3 | ENSG00000203812 | -3.34   | 0.01 |
| HIST2H2AA4 | ENSG00000272196 | -3.36   | 0.01 |
| HIST2H2AC  | ENSG00000184260 | -6.45   | 0.00 |
| HIST2H2BF  | ENSG00000203814 | -3.81   | 0.00 |
| HIST2H4B   | ENSG00000270276 | -2.95   | 0.01 |
| HIST3H2BB  | ENSG00000196890 | -145.01 | 0.01 |
| HKDC1      | ENSG00000156510 | 1.89    | 0.00 |
| HLA-F-AS1  | ENSG00000214922 | -2.19   | 0.01 |
| HLCS       | ENSG00000159267 | 1.28    | 0.04 |
| HMGA1      | ENSG00000137309 | 1.89    | 0.00 |
| HMGA1P2    | ENSG00000248641 | 2.14    | 0.02 |
| HMGB3      | ENSG00000029993 | -1.42   | 0.02 |
| HMGCS2     | ENSG00000134240 | -10.13  | 0.01 |
| HNF1B      | ENSG00000275410 | -1.34   | 0.04 |
| HNF4A-AS1  | ENSG00000229005 | -1.46   | 0.04 |
| HNRNPAB    | ENSG00000197451 | 1.38    | 0.00 |
| HOOK2      | ENSG00000095066 | -1.40   | 0.04 |
| HOXA3      | ENSG00000105997 | -1.59   | 0.01 |
| HOXB9      | ENSG00000170689 | -184.82 | 0.00 |
| HOXC10     | ENSG00000180818 | -3.05   | 0.00 |
| HOXD1      | ENSG00000128645 | -2.58   | 0.00 |
| HPN        | ENSG00000105707 | -1.43   | 0.02 |
| HPRT1      | ENSG00000165704 | 1.42    | 0.01 |
| HPX        | ENSG00000110169 | -3.16   | 0.00 |
| HS6ST1P1   | ENSG00000187952 | -2.73   | 0.00 |
| HS6ST2     | ENSG00000171004 | -162.02 | 0.00 |
| HSP90AB1   | ENSG00000096384 | 1.2     | 0.03 |
| HSPA4      | ENSG00000170606 | 1.3     | 0.02 |
| HSPA5      | ENSG00000044574 | 1.33    | 0.00 |
| HSPA9      | ENSG00000113013 | 1.26    | 0.03 |
| HSPBAP1    | ENSG00000169087 | 1.57    | 0.05 |
| HSPH1      | ENSG00000120694 | 1.77    | 0.00 |
| HYOU1      | ENSG00000149428 | 1.3     | 0.03 |
| IBA57      | ENSG00000181873 | -1.39   | 0.01 |
| ICAM1      | ENSG00000090339 | 1.65    | 0.01 |
| ICAM4      | ENSG00000105371 | -2.66   | 0.01 |
| IDE        | ENSG00000119912 | 1.49    | 0.03 |
| IDH1       | ENSG00000138413 | -1.35   | 0.01 |
| IDH2       | ENSG00000182054 | -1.44   | 0.03 |



|         |                 |        |      |
|---------|-----------------|--------|------|
| IER3    | ENSG00000137331 | 2.58   | 0.00 |
| IFNGR1  | ENSG00000027697 | 1.37   | 0.03 |
| IFRD1   | ENSG00000006652 | 1.68   | 0.00 |
| IFT122  | ENSG00000163913 | -1.57  | 0.03 |
| IFT140  | ENSG00000187535 | -1.47  | 0.01 |
| IFT46   | ENSG00000118096 | -2.16  | 0.01 |
| IFT88   | ENSG00000032742 | 1.63   | 0.01 |
| IGDCC3  | ENSG00000174498 | -1.62  | 0.00 |
| IGF2    | ENSG00000167244 | -1.73  | 0.00 |
| IGF2-AS | ENSG00000099869 | -3.94  | 0.00 |
| IGF2R   | ENSG00000197081 | 1.5    | 0.03 |
| IGFBP1  | ENSG00000146678 | 3.33   | 0.02 |
| IGFBP3  | ENSG00000146674 | 2.33   | 0.00 |
| IGFBP4  | ENSG00000141753 | 1.55   | 0.02 |
| IGSF3   | ENSG00000143061 | -3.18  | 0.01 |
| IKBK    | ENSG00000269335 | 2.98   | 0.00 |
| IL11    | ENSG00000095752 | 2.74   | 0.00 |
| IL17RE  | ENSG00000163701 | -1.61  | 0.01 |
| IL18    | ENSG00000150782 | 2.56   | 0.01 |
| IL22RA1 | ENSG00000142677 | -1.77  | 0.00 |
| IL27RA  | ENSG00000104998 | 1.29   | 0.04 |
| IL2RG   | ENSG00000147168 | 3.05   | 0.02 |
| IL6R    | ENSG00000160712 | 6.36   | 0.00 |
| INHA    | ENSG00000123999 | -2.01  | 0.00 |
| INPP5J  | ENSG00000185133 | -3.10  | 0.01 |
| INPPL1  | ENSG00000165458 | -1.47  | 0.02 |
| INSIG1  | ENSG00000186480 | -63.12 | 0.01 |
| INTS12  | ENSG00000138785 | 1.32   | 0.02 |
| INTS13  | ENSG00000064102 | 1.42   | 0.03 |
| IP6K2   | ENSG00000068745 | -1.41  | 0.03 |
| IPO9    | ENSG00000198700 | -1.24  | 0.04 |
| IQCB1   | ENSG00000173226 | 1.31   | 0.04 |
| IQCE    | ENSG00000106012 | -1.71  | 0.01 |
| IQGAP3  | ENSG00000183856 | -1.71  | 0.01 |
| IRAK2   | ENSG00000134070 | 1.33   | 0.01 |
| IRF1    | ENSG00000125347 | -1.48  | 0.04 |
| IRX3    | ENSG00000177508 | -1.93  | 0.00 |
| ISCA1   | ENSG00000135070 | 1.59   | 0.02 |
| ISYNA1  | ENSG00000105655 | -1.65  | 0.02 |
| ITFG1   | ENSG00000129636 | 1.24   | 0.04 |
| ITGA1   | ENSG00000213949 | 2.08   | 0.02 |
| ITGA10  | ENSG00000143127 | 1.39   | 0.04 |
| ITGA5   | ENSG00000161638 | -6.77  | 0.00 |
| ITGAL   | ENSG00000005844 | -3.18  | 0.02 |
| ITGAV   | ENSG00000138448 | 1.93   | 0.04 |
| ITGB1   | ENSG00000150093 | 1.67   | 0.02 |

|            |                 |        |      |
|------------|-----------------|--------|------|
| ITGB2      | ENSG00000160255 | -1.47  | 0.03 |
| ITGB4      | ENSG00000132470 | -1.57  | 0.02 |
| ITIH1      | ENSG00000055957 | -2.31  | 0.00 |
| ITIH4      | ENSG00000055955 | -1.46  | 0.02 |
| ITIH5      | ENSG00000123243 | -1.42  | 0.02 |
| ITPRIP     | ENSG00000148841 | 1.63   | 0.00 |
| JAG1       | ENSG00000101384 | 3.37   | 0.00 |
| JHDM1D-AS1 | ENSG00000260231 | 1.36   | 0.03 |
| JMJD7      | ENSG00000243789 | -1.36  | 0.03 |
| JPX        | ENSG00000225470 | -1.53  | 0.02 |
| JUP        | ENSG00000173801 | -2.00  | 0.01 |
| KALRN      | ENSG00000160145 | 1.56   | 0.00 |
| KANK2      | ENSG00000197256 | -1.55  | 0.01 |
| KANK4      | ENSG00000132854 | -3.18  | 0.00 |
| KAZALD1    | ENSG00000107821 | -1.74  | 0.00 |
| KCNC4      | ENSG00000116396 | -2.28  | 0.04 |
| KCNJ11     | ENSG00000187486 | -3.05  | 0.00 |
| KCTD1      | ENSG00000134504 | -1.56  | 0.02 |
| KCTD12     | ENSG00000178695 | -40.79 | 0.01 |
| KCTD21-AS1 | ENSG00000246174 | -1.91  | 0.03 |
| KCTD3      | ENSG00000136636 | -1.64  | 0.05 |
| KCTD9      | ENSG00000104756 | 1.68   | 0.01 |
| KDSR       | ENSG00000119537 | 1.43   | 0.02 |
| KIAA0922   | ENSG00000121210 | 1.33   | 0.04 |
| KIAA1161   | ENSG00000164976 | -1.36  | 0.03 |
| KIF12      | ENSG00000136883 | -2.19  | 0.01 |
| KIF18A     | ENSG00000121621 | -1.44  | 0.02 |
| KIF1A      | ENSG00000130294 | -63.56 | 0.01 |
| KIF20A     | ENSG00000112984 | -1.66  | 0.01 |
| KIF22      | ENSG00000079616 | -1.46  | 0.01 |
| KIF2C      | ENSG00000142945 | -1.39  | 0.01 |
| KIF7       | ENSG00000166813 | -1.43  | 0.03 |
| KLB        | ENSG00000134962 | -2.10  | 0.00 |
| KLC4       | ENSG00000137171 | -1.82  | 0.00 |
| KLF10      | ENSG00000155090 | 1.55   | 0.02 |
| KLF11      | ENSG00000172059 | -1.73  | 0.02 |
| KLF9       | ENSG00000119138 | 1.69   | 0.01 |
| KLHDC2     | ENSG00000165516 | -1.29  | 0.03 |
| KLHDC7A    | ENSG00000179023 | -1.92  | 0.02 |
| KLHL13     | ENSG00000003096 | -3.71  | 0.00 |
| KLHL14     | ENSG00000197705 | -1.66  | 0.00 |
| KLHL25     | ENSG00000183655 | -1.53  | 0.03 |
| KLHL5      | ENSG00000109790 | 1.35   | 0.03 |
| KMT5C      | ENSG00000133247 | -1.73  | 0.05 |
| KPNA1      | ENSG00000114030 | 1.45   | 0.03 |
| KPNA4      | ENSG00000186432 | 1.45   | 0.03 |

|           |                 |         |      |
|-----------|-----------------|---------|------|
| KYNU      | ENSG00000115919 | 1.82    | 0.00 |
| L3MBTL4   | ENSG00000154655 | 1.36    | 0.03 |
| LAMA3     | ENSG00000053747 | -2.71   | 0.02 |
| LAMA4     | ENSG00000112769 | -136.24 | 0.01 |
| LARGE2    | ENSG00000165905 | -1.73   | 0.00 |
| LCAT      | ENSG00000213398 | -1.38   | 0.05 |
| LCN15     | ENSG00000177984 | -2.30   | 0.01 |
| LDHD      | ENSG00000166816 | -2.22   | 0.00 |
| LGALS2    | ENSG00000100079 | -1.82   | 0.03 |
| LGALS3    | ENSG00000131981 | 1.98    | 0.00 |
| LGALS8    | ENSG00000116977 | 1.52    | 0.00 |
| LIF       | ENSG00000128342 | 3.1     | 0.01 |
| LIG1      | ENSG00000105486 | -1.46   | 0.01 |
| LINC00346 | ENSG00000255874 | 5.48    | 0.00 |
| LINC00659 | ENSG00000228705 | 2.48    | 0.02 |
| LINC00846 | ENSG00000186842 | 1.32    | 0.03 |
| LINC00870 | ENSG00000243083 | -2.53   | 0.00 |
| LINC00941 | ENSG00000235884 | 5.15    | 0.00 |
| LINC01124 | ENSG00000222033 | -1.45   | 0.01 |
| LINC01184 | ENSG00000245937 | 1.69    | 0.04 |
| LINC01337 | ENSG00000251221 | -3.01   | 0.04 |
| LINC01484 | ENSG00000253686 | 3.57    | 0.04 |
| LINC01564 | ENSG00000235899 | 14.73   | 0.00 |
| LINC01770 | ENSG00000225285 | -1.68   | 0.00 |
| LINC02313 | ENSG00000258474 | 1.55    | 0.03 |
| LINC02413 | ENSG00000257345 | -7.01   | 0.00 |
| LINGO4    | ENSG00000213171 | -2.13   | 0.02 |
| LIVAR     | ENSG00000266304 | 2.35    | 0.00 |
| LMAN1     | ENSG00000074695 | 1.61    | 0.05 |
| LMF1      | ENSG00000103227 | -1.51   | 0.04 |
| LMNTD2    | ENSG00000185522 | 1.86    | 0.02 |
| LOXL3     | ENSG00000115318 | -2.57   | 0.02 |
| LPCAT3    | ENSG00000111684 | -1.34   | 0.02 |
| LRCH1     | ENSG00000136141 | 1.63    | 0.00 |
| LRFN4     | ENSG00000173621 | 1.72    | 0.01 |
| LRP8      | ENSG00000157193 | 2.04    | 0.00 |
| LRPPRC    | ENSG00000138095 | 1.32    | 0.03 |
| LRRC1     | ENSG00000137269 | 1.49    | 0.00 |
| LRRC3     | ENSG00000160233 | -1.68   | 0.00 |
| LRRC49    | ENSG00000137821 | -1.88   | 0.05 |
| LRRC75B   | ENSG00000178026 | -1.85   | 0.01 |
| LSG1      | ENSG00000041802 | 1.32    | 0.01 |
| LSM14B    | ENSG00000149657 | -1.38   | 0.01 |
| LSS       | ENSG00000160285 | -1.61   | 0.01 |
| LTBP4     | ENSG00000090006 | -2.25   | 0.00 |
| LTBR      | ENSG00000111321 | 1.62    | 0.00 |

|          |                 |         |      |
|----------|-----------------|---------|------|
| LUCAT1   | ENSG00000248323 | 32.91   | 0.00 |
| LURAP1L  | ENSG00000153714 | 1.82    | 0.00 |
| LYAR     | ENSG00000145220 | 1.4     | 0.01 |
| LZTS2    | ENSG00000107816 | -1.61   | 0.00 |
| MAB21L3  | ENSG00000173212 | 2.39    | 0.01 |
| MAFF     | ENSG00000185022 | 1.51    | 0.00 |
| MAG      | ENSG00000105695 | 6.88    | 0.00 |
| MAGED2   | ENSG00000102316 | -1.44   | 0.01 |
| MAGED4   | ENSG00000154545 | -1.59   | 0.02 |
| MAK16    | ENSG00000198042 | 1.71    | 0.00 |
| MAP2K1   | ENSG00000169032 | 1.41    | 0.00 |
| MAP2K6   | ENSG00000108984 | -2.13   | 0.00 |
| MAP3K14  | ENSG00000006062 | 1.64    | 0.01 |
| MAP3K21  | ENSG00000143674 | -206.50 | 0.00 |
| MAP3K3   | ENSG00000198909 | -1.34   | 0.05 |
| MAP4K4   | ENSG00000071054 | -1.41   | 0.00 |
| MAPK13   | ENSG00000156711 | 1.41    | 0.00 |
| MAPK6    | ENSG00000069956 | 1.63    | 0.05 |
| MAPRE1   | ENSG00000101367 | 1.25    | 0.05 |
| MAPT     | ENSG00000186868 | -1.71   | 0.05 |
| MARC1    | ENSG00000186205 | -132.51 | 0.03 |
| MARC3    | ENSG00000173926 | -1.52   | 0.02 |
| MARVELD1 | ENSG00000155254 | -1.38   | 0.00 |
| MARVELD3 | ENSG00000140832 | -1.80   | 0.02 |
| MAST3    | ENSG00000099308 | -222.86 | 0.02 |
| MATN3    | ENSG00000132031 | -1.87   | 0.00 |
| MBOAT2   | ENSG00000143797 | -1.69   | 0.00 |
| MCC      | ENSG00000171444 | -1.35   | 0.02 |
| MCM2     | ENSG00000073111 | -1.36   | 0.01 |
| MCM3     | ENSG00000112118 | 1.66    | 0.03 |
| MCM7     | ENSG00000166508 | 1.45    | 0.05 |
| ME2      | ENSG00000082212 | -1.72   | 0.00 |
| MEAF6    | ENSG00000163875 | -1.75   | 0.03 |
| MEIKIN   | ENSG00000239642 | 1.8     | 0.04 |
| METTL7A  | ENSG00000185432 | 1.4     | 0.04 |
| METTL7B  | ENSG00000170439 | -1.48   | 0.00 |
| METTL8   | ENSG00000123600 | -1.72   | 0.02 |
| MEX3A    | ENSG00000254726 | -3.81   | 0.03 |
| MEX3B    | ENSG00000183496 | -1.69   | 0.04 |
| MFAP2    | ENSG00000117122 | 1.5     | 0.00 |
| MFGE8    | ENSG00000140545 | -1.96   | 0.03 |
| MFSD1    | ENSG00000118855 | 2.49    | 0.02 |
| MFSD2B   | ENSG00000205639 | 1.62    | 0.04 |
| MGST1    | ENSG00000008394 | -1.47   | 0.00 |
| MIA2     | ENSG00000150526 | 2.46    | 0.03 |
| MINDY1   | ENSG00000143409 | 2.65    | 0.03 |

|             |                 |        |      |
|-------------|-----------------|--------|------|
| MIR29A      | ENSG00000284032 | -1.55  | 0.01 |
| MIR4435-2HG | ENSG00000172965 | -2.53  | 0.00 |
| MIS18A      | ENSG00000159055 | -1.83  | 0.01 |
| MIXL1       | ENSG00000185155 | 1.54   | 0.00 |
| MKI67       | ENSG00000148773 | 1.96   | 0.03 |
| MKLN1       | ENSG00000128585 | -1.74  | 0.01 |
| MKLN1-AS    | ENSG00000236753 | -1.28  | 0.01 |
| MKNK2       | ENSG00000099875 | 1.81   | 0.00 |
| MKS1        | ENSG00000011143 | -1.57  | 0.05 |
| MLH3        | ENSG00000119684 | 3.23   | 0.03 |
| MLXIPL      | ENSG00000009950 | -1.33  | 0.02 |
| MLYCD       | ENSG00000103150 | 4.6    | 0.00 |
| MMAB        | ENSG00000139428 | 1.32   | 0.05 |
| MMP10       | ENSG00000166670 | 1.56   | 0.02 |
| MOGS        | ENSG00000115275 | 1.39   | 0.03 |
| MORC4       | ENSG00000133131 | -1.52  | 0.00 |
| MOSPD1      | ENSG00000101928 | 1.33   | 0.03 |
| MOV10       | ENSG00000155363 | 1.64   | 0.00 |
| MPHOSPH6    | ENSG00000135698 | -1.55  | 0.04 |
| MPP6        | ENSG00000105926 | -1.71  | 0.03 |
| MPP7        | ENSG00000150054 | 1.68   | 0.05 |
| MPZ         | ENSG00000158887 | -1.75  | 0.02 |
| MPZL3       | ENSG00000160588 | -1.69  | 0.00 |
| MROH6       | ENSG00000204839 | 1.42   | 0.05 |
| MRPL43      | ENSG00000055950 | 1.71   | 0.00 |
| MRPS10      | ENSG00000048544 | -1.41  | 0.03 |
| MRPS35      | ENSG00000061794 | -3.56  | 0.01 |
| MSH5        | ENSG00000204410 | -98.36 | 0.03 |
| MSI1        | ENSG00000135097 | -1.35  | 0.01 |
| MSN         | ENSG00000147065 | -2.13  | 0.01 |
| MTCL1       | ENSG00000168502 | 1.99   | 0.00 |
| MTHFD1L     | ENSG00000120254 | 1.32   | 0.01 |
| MTMR10      | ENSG00000166912 | 1.77   | 0.03 |
| MTMR2       | ENSG00000087053 | 1.52   | 0.02 |
| MTRF1L      | ENSG00000112031 | 1.71   | 0.03 |
| MUTYH       | ENSG00000132781 | -1.47  | 0.04 |
| MVB12B      | ENSG00000196814 | -1.41  | 0.01 |
| MX2         | ENSG00000183486 | 1.55   | 0.03 |
| MYO10       | ENSG00000145555 | -1.69  | 0.00 |
| MYO15B      | ENSG00000266714 | 1.46   | 0.01 |
| MYO1G       | ENSG00000136286 | -2.39  | 0.00 |
| NAA20       | ENSG00000173418 | 1.42   | 0.01 |
| NAA35       | ENSG00000135040 | 1.3    | 0.04 |
| NAA40       | ENSG00000110583 | -1.32  | 0.04 |
| NAAA        | ENSG00000138744 | 1.31   | 0.03 |

|           |                 |         |      |
|-----------|-----------------|---------|------|
| NAALADL1  | ENSG00000168060 | -1.83   | 0.01 |
| NABP1     | ENSG00000173559 | 2.41    | 0.01 |
| NAF1      | ENSG00000145414 | 1.74    | 0.01 |
| NAGS      | ENSG00000161653 | 1.78    | 0.03 |
| NAT8L     | ENSG00000185818 | -1.92   | 0.01 |
| NATD1     | ENSG00000274180 | -1.52   | 0.03 |
| NBPF2P    | ENSG00000227001 | -2.08   | 0.04 |
| NCAPD2    | ENSG00000010292 | -1.43   | 0.00 |
| NCF2      | ENSG00000116701 | 10.71   | 0.00 |
| NCL       | ENSG00000115053 | 1.33    | 0.02 |
| NDRG4     | ENSG00000103034 | -2.14   | 0.01 |
| NDUF4F4   | ENSG00000123545 | 1.79    | 0.00 |
| NECAB3    | ENSG00000125967 | 1.39    | 0.05 |
| NECAP1    | ENSG00000089818 | 1.7     | 0.00 |
| NEK2      | ENSG00000117650 | -1.73   | 0.00 |
| NELL2     | ENSG00000184613 | -154.34 | 0.00 |
| NES       | ENSG00000132688 | 1.56    | 0.00 |
| NEURL1B   | ENSG00000214357 | -4.79   | 0.01 |
| NFE2L3    | ENSG00000050344 | 1.53    | 0.00 |
| NFIC      | ENSG00000141905 | 1.38    | 0.04 |
| NFYC      | ENSG00000066136 | -1.37   | 0.02 |
| NID2      | ENSG00000087303 | -115.36 | 0.00 |
| NIFK      | ENSG00000155438 | 1.75    | 0.01 |
| NIPA2     | ENSG00000140157 | 1.38    | 0.02 |
| NIT2      | ENSG00000114021 | 1.37    | 0.05 |
| NKD1      | ENSG00000140807 | -1.25   | 0.03 |
| NLGN2     | ENSG00000169992 | -1.92   | 0.01 |
| NLN       | ENSG00000123213 | 1.66    | 0.01 |
| NMRAL2P   | ENSG00000171658 | 5.64    | 0.02 |
| NMRK1     | ENSG00000106733 | -1.77   | 0.01 |
| NNT       | ENSG00000112992 | -1.36   | 0.04 |
| NOL10     | ENSG00000115761 | 1.44    | 0.03 |
| NOLC1     | ENSG00000166197 | 1.59    | 0.00 |
| NOP14-AS1 | ENSG00000249673 | 2.59    | 0.05 |
| NOP2      | ENSG00000111641 | 1.41    | 0.00 |
| NOTCH1    | ENSG00000148400 | -4.26   | 0.00 |
| NOTCH3    | ENSG00000074181 | -2.22   | 0.04 |
| NPAS1     | ENSG00000130751 | 2.77    | 0.00 |
| NPHP4     | ENSG00000131697 | -1.66   | 0.00 |
| NPNT      | ENSG00000168743 | -2.53   | 0.01 |
| NPTXR     | ENSG00000221890 | -2.00   | 0.00 |
| NQO1      | ENSG00000181019 | 3.26    | 0.00 |
| NR2C2AP   | ENSG00000184162 | 1.77    | 0.00 |
| NR2F2     | ENSG00000185551 | -1.51   | 0.00 |
| NR2F6     | ENSG00000160113 | -1.69   | 0.04 |
| NREP      | ENSG00000134986 | -2.28   | 0.00 |

|                |                 |         |      |
|----------------|-----------------|---------|------|
| NRM            | ENSG00000137404 | -1.96   | 0.01 |
| NRP2           | ENSG00000118257 | -2.23   | 0.01 |
| NRTN           | ENSG00000171119 | -2.16   | 0.02 |
| NSD1           | ENSG00000165671 | -186.11 | 0.01 |
| NSMCE4A        | ENSG00000107672 | -1.29   | 0.04 |
| NSUN2          | ENSG00000037474 | 1.62    | 0.00 |
| NTN4           | ENSG00000074527 | -1.80   | 0.01 |
| NUDCD1         | ENSG00000120526 | 1.42    | 0.02 |
| NUDT1          | ENSG00000106268 | -1.61   | 0.05 |
| NUDT8          | ENSG00000167799 | -1.89   | 0.03 |
| NUSAP1         | ENSG00000137804 | -1.49   | 0.02 |
| NUTM2A-<br>AS1 | ENSG00000223482 | 1.48    | 0.02 |
| NXPE3          | ENSG00000144815 | 1.91    | 0.01 |
| NYNRIN         | ENSG00000205978 | -4.41   | 0.00 |
| OBSL1          | ENSG00000124006 | -1.52   | 0.03 |
| ODAM           | ENSG00000109205 | -2.03   | 0.03 |
| ODC1           | ENSG00000115758 | 1.83    | 0.00 |
| OGDHL          | ENSG00000197444 | -1.52   | 0.04 |
| OIT3           | ENSG00000138315 | -1.62   | 0.01 |
| OLAH           | ENSG00000152463 | 8.77    | 0.01 |
| OLFML1         | ENSG00000183801 | -2.93   | 0.01 |
| OLFML3         | ENSG00000116774 | -1.99   | 0.01 |
| OSBP2          | ENSG00000184792 | -1.84   | 0.01 |
| OSBPL3         | ENSG00000070882 | 1.37    | 0.04 |
| OSGIN2         | ENSG00000164823 | 1.63    | 0.04 |
| OSMR           | ENSG00000145623 | 2.01    | 0.00 |
| OTUB2          | ENSG00000089723 | 1.81    | 0.01 |
| OTX1           | ENSG00000115507 | -1.65   | 0.02 |
| P2RY2          | ENSG00000175591 | -1.67   | 0.04 |
| P2RY6          | ENSG00000171631 | 9.26    | 0.00 |
| P2RY8          | ENSG00000182162 | -1.91   | 0.00 |
| PAG1           | ENSG00000076641 | -9.32   | 0.00 |
| PAK1           | ENSG00000149269 | -1.80   | 0.05 |
| PAK1IP1        | ENSG00000111845 | 1.58    | 0.00 |
| PAK4           | ENSG00000130669 | -1.79   | 0.00 |
| PALLD          | ENSG00000129116 | 2.93    | 0.00 |
| PALM3          | ENSG00000187867 | -2.38   | 0.01 |
| PANK1          | ENSG00000152782 | -1.40   | 0.02 |
| PANX2          | ENSG00000073150 | 2.68    | 0.00 |
| PAPSS1         | ENSG00000138801 | -1.48   | 0.00 |
| PAQR5          | ENSG00000137819 | 2.38    | 0.00 |
| PAQR8          | ENSG00000170915 | -1.49   | 0.00 |
| PARD3          | ENSG00000148498 | 1.29    | 0.02 |
| PARP10         | ENSG00000178685 | -1.52   | 0.03 |
| PART1          | ENSG00000152931 | 1.44    | 0.03 |

|           |                 |         |      |
|-----------|-----------------|---------|------|
| PBK       | ENSG00000168078 | -1.58   | 0.02 |
| PBLD      | ENSG00000108187 | -1.57   | 0.04 |
| PBX1      | ENSG00000185630 | -233.94 | 0.00 |
| PBXIP1    | ENSG00000163346 | -1.91   | 0.00 |
| PCDH9     | ENSG00000184226 | -195.36 | 0.00 |
| PCIF1     | ENSG00000100982 | -1.31   | 0.04 |
| PCNX2     | ENSG00000135749 | -163.14 | 0.00 |
| PCOLCE    | ENSG00000106333 | -2.11   | 0.00 |
| PCSK4     | ENSG00000115257 | -2.01   | 0.00 |
| PCSK9     | ENSG00000169174 | -1.55   | 0.01 |
| PCTP      | ENSG00000141179 | -1.33   | 0.01 |
| PCYT1A    | ENSG00000161217 | 1.53    | 0.02 |
| PCYT1B    | ENSG00000102230 | -1.72   | 0.01 |
| PCYT2     | ENSG00000185813 | -1.45   | 0.03 |
| PDCD1     | ENSG00000188389 | 12.81   | 0.02 |
| PDCD11    | ENSG00000148843 | 1.3     | 0.03 |
| PDCD4-AS1 | ENSG00000203497 | -2.28   | 0.00 |
| PDGFB     | ENSG00000100311 | 1.4     | 0.05 |
| PDLIM5    | ENSG00000163110 | 1.29    | 0.04 |
| PDZD7     | ENSG00000186862 | -3.16   | 0.01 |
| PDZK1     | ENSG00000174827 | -1.54   | 0.02 |
| PEBP1     | ENSG00000089220 | -1.35   | 0.03 |
| PEG13     | ENSG00000282164 | -1.52   | 0.01 |
| PELI2     | ENSG00000139946 | -24.76  | 0.00 |
| PER1      | ENSG00000179094 | -1.30   | 0.04 |
| PEX11A    | ENSG00000166821 | -1.38   | 0.03 |
| PEX3      | ENSG00000034693 | 1.3     | 0.04 |
| PEX6      | ENSG00000124587 | -1.52   | 0.04 |
| PFDN4     | ENSG00000101132 | 1.5     | 0.04 |
| PFKM      | ENSG00000152556 | -3.29   | 0.00 |
| PFKP      | ENSG00000067057 | 1.51    | 0.03 |
| PGC       | ENSG00000096088 | -2.19   | 0.00 |
| PGLYRP2   | ENSG00000161031 | -4.99   | 0.00 |
| PGM1      | ENSG00000079739 | -1.51   | 0.00 |
| PHC2      | ENSG00000134686 | 1.33    | 0.03 |
| PHGDH     | ENSG00000092621 | -1.71   | 0.00 |
| PHLDA1    | ENSG00000139289 | 1.34    | 0.00 |
| PHLDA2    | ENSG00000181649 | 2.97    | 0.00 |
| PHLPP1    | ENSG00000081913 | -1.43   | 0.01 |
| PHTF1     | ENSG00000116793 | 1.6     | 0.00 |
| PI4KAP1   | ENSG00000274602 | -1.48   | 0.01 |
| PIDD1     | ENSG00000177595 | -1.56   | 0.02 |
| PIF1      | ENSG00000140451 | -1.69   | 0.00 |
| PIGW      | ENSG00000277161 | 1.55    | 0.02 |
| PIGZ      | ENSG00000119227 | -1.64   | 0.01 |
| PIK3C2B   | ENSG00000133056 | -1.78   | 0.03 |



|          |                 |       |      |
|----------|-----------------|-------|------|
| PIK3CD   | ENSG00000171608 | 1.49  | 0.00 |
| PIK3IP1  | ENSG00000100100 | -2.30 | 0.00 |
| PIK3R3   | ENSG00000117461 | -1.87 | 0.02 |
| PIM1     | ENSG00000137193 | 2.21  | 0.00 |
| PIMREG   | ENSG00000129195 | -1.52 | 0.03 |
| PIP4K2A  | ENSG00000150867 | 1.45  | 0.03 |
| PIP5K1B  | ENSG00000107242 | -1.51 | 0.01 |
| PIPOX    | ENSG00000179761 | -1.35 | 0.05 |
| PIR      | ENSG00000087842 | 2.92  | 0.00 |
| PKD1L2   | ENSG00000166473 | 2.19  | 0.01 |
| PLA2G12B | ENSG00000138308 | -1.51 | 0.00 |
| PLA2G2A  | ENSG00000188257 | -2.60 | 0.02 |
| PLA2G3   | ENSG00000100078 | -2.38 | 0.02 |
| PLAA     | ENSG00000137055 | 1.3   | 0.02 |
| PLAC8    | ENSG00000145287 | 1.59  | 0.00 |
| PLAT     | ENSG00000104368 | -2.95 | 0.01 |
| PLCB3    | ENSG00000149782 | -1.48 | 0.01 |
| PLCD1    | ENSG00000187091 | -1.57 | 0.02 |
| PLCE1    | ENSG00000138193 | -3.14 | 0.01 |
| PLCH2    | ENSG00000149527 | 2.51  | 0.01 |
| PLD2     | ENSG00000129219 | -1.62 | 0.04 |
| PLEKHA6  | ENSG00000143850 | 1.49  | 0.00 |
| PLEKHB1  | ENSG00000021300 | -1.59 | 0.00 |
| PLEKHB2  | ENSG00000115762 | 1.21  | 0.03 |
| PLEKHG3  | ENSG00000126822 | -1.73 | 0.00 |
| PLEKHG6  | ENSG00000008323 | -1.73 | 0.00 |
| PLEKHM1  | ENSG00000225190 | 1.31  | 0.03 |
| PLK3     | ENSG00000173846 | 1.49  | 0.01 |
| PLPPR1   | ENSG00000148123 | -1.52 | 0.04 |
| PMM1     | ENSG00000100417 | -1.78 | 0.00 |
| PMM2     | ENSG00000140650 | 1.29  | 0.02 |
| PNCK     | ENSG00000130822 | -1.73 | 0.01 |
| PNMA8A   | ENSG00000182013 | -3.81 | 0.03 |
| PNO1     | ENSG00000115946 | 1.55  | 0.00 |
| PNPT1    | ENSG00000138035 | 1.53  | 0.01 |
| POC1A    | ENSG00000164087 | -1.79 | 0.00 |
| PODXL    | ENSG00000128567 | -2.13 | 0.00 |
| POLD4    | ENSG00000175482 | 2.06  | 0.01 |
| POLR3G   | ENSG00000113356 | 2.15  | 0.02 |
| POMP     | ENSG00000132963 | 1.5   | 0.04 |
| POMT1    | ENSG00000130714 | -1.47 | 0.01 |
| PON2     | ENSG00000105854 | 1.52  | 0.00 |
| POP1     | ENSG00000104356 | 1.9   | 0.00 |
| PPID     | ENSG00000171497 | 1.52  | 0.01 |
| PPIP5K1  | ENSG00000168781 | -1.59 | 0.02 |
| PPM1L    | ENSG00000163590 | -3.86 | 0.00 |

|           |                 |         |      |
|-----------|-----------------|---------|------|
| PPP1R15A  | ENSG00000087074 | 1.48    | 0.02 |
| PPP1R16A  | ENSG00000160972 | -1.51   | 0.03 |
| PPP2CB    | ENSG00000104695 | 1.25    | 0.02 |
| PPTC7     | ENSG00000196850 | 1.49    | 0.05 |
| PRC1      | ENSG00000198901 | -1.65   | 0.00 |
| PRDX1     | ENSG00000117450 | 1.52    | 0.00 |
| PRMT2     | ENSG00000160310 | -1.41   | 0.01 |
| PRMT3     | ENSG00000185238 | 1.73    | 0.00 |
| PRNP      | ENSG00000171867 | 1.51    | 0.00 |
| PRPSAP1   | ENSG00000161542 | -1.71   | 0.00 |
| PRR15L    | ENSG00000167183 | -3.61   | 0.01 |
| PRR26     | ENSG00000180525 | 1.73    | 0.03 |
| PRR36     | ENSG00000183248 | -2.89   | 0.00 |
| PRR5      | ENSG00000186654 | 1.47    | 0.04 |
| PRSS8     | ENSG00000052344 | -1.75   | 0.01 |
| PSMB8-AS1 | ENSG00000204261 | -2.79   | 0.00 |
| PSMC1     | ENSG00000100764 | 1.4     | 0.03 |
| PSMC2     | ENSG00000161057 | 1.3     | 0.02 |
| PSMC6     | ENSG00000100519 | 1.34    | 0.04 |
| PSMD1     | ENSG00000173692 | 1.3     | 0.01 |
| PSMD11    | ENSG00000108671 | 1.62    | 0.00 |
| PSMD12    | ENSG00000197170 | 1.54    | 0.01 |
| PSMD14    | ENSG00000115233 | 1.28    | 0.03 |
| PSME3     | ENSG00000131467 | 3.61    | 0.00 |
| PSME4     | ENSG00000068878 | 1.71    | 0.04 |
| PSMG1     | ENSG00000183527 | 1.36    | 0.02 |
| PSRC1     | ENSG00000134222 | -2.28   | 0.00 |
| PTCH2     | ENSG00000117425 | -1.88   | 0.01 |
| PTER      | ENSG00000165983 | 2.48    | 0.00 |
| PTGR1     | ENSG00000106853 | 5.25    | 0.00 |
| PTK2B     | ENSG00000120899 | -2.07   | 0.01 |
| PTMS      | ENSG00000159335 | -1.55   | 0.02 |
| PTOV1-AS1 | ENSG00000268006 | -1.53   | 0.02 |
| PTPN13    | ENSG00000163629 | -548.75 | 0.00 |
| PTPN18    | ENSG00000072135 | -1.33   | 0.02 |
| PTS       | ENSG00000150787 | 1.41    | 0.01 |
| PUM3      | ENSG00000080608 | 1.48    | 0.00 |
| PWP2      | ENSG00000241945 | 1.43    | 0.03 |
| PXDC1     | ENSG00000168994 | 1.83    | 0.03 |
| PXN       | ENSG00000089159 | 1.31    | 0.02 |
| PXYLP1    | ENSG00000155893 | -2.06   | 0.00 |
| PYCARD    | ENSG00000103490 | -1.84   | 0.01 |
| PYGL      | ENSG00000100504 | -1.35   | 0.00 |
| PYGO2     | ENSG00000163348 | 1.49    | 0.00 |
| QRICH2    | ENSG00000129646 | -1.64   | 0.04 |
| QSOX2     | ENSG00000165661 | 1.66    | 0.01 |

|           |                 |       |      |
|-----------|-----------------|-------|------|
| RAB10     | ENSG00000084733 | 1.68  | 0.00 |
| RAB11FIP3 | ENSG00000090565 | -1.35 | 0.03 |
| RAB12     | ENSG00000206418 | 1.51  | 0.01 |
| RAB26     | ENSG00000167964 | -3.05 | 0.02 |
| RAB27A    | ENSG00000069974 | 1.54  | 0.01 |
| RAB3B     | ENSG00000169213 | 1.57  | 0.00 |
| RAB40B    | ENSG00000141542 | -1.56 | 0.01 |
| RAB6B     | ENSG00000154917 | -2.03 | 0.02 |
| RAB7A     | ENSG00000075785 | 1.21  | 0.02 |
| RAC3      | ENSG00000169750 | -1.80 | 0.03 |
| RAI14     | ENSG00000039560 | 1.73  | 0.04 |
| RALGPS1   | ENSG00000136828 | -1.87 | 0.00 |
| RARG      | ENSG00000172819 | -2.04 | 0.03 |
| RARRES2   | ENSG00000106538 | -1.48 | 0.03 |
| RASD1     | ENSG00000108551 | 2.69  | 0.00 |
| RASGRF2   | ENSG00000113319 | 1.64  | 0.01 |
| RASSF3    | ENSG00000153179 | 1.57  | 0.02 |
| RBBP7     | ENSG00000102054 | -1.27 | 0.04 |
| RBBP8NL   | ENSG00000130701 | -3.05 | 0.03 |
| RBM19     | ENSG00000122965 | 1.37  | 0.00 |
| RBM23     | ENSG00000100461 | -3.29 | 0.00 |
| RBM24     | ENSG00000112183 | 3.83  | 0.00 |
| RBM7      | ENSG00000076053 | 1.35  | 0.01 |
| RBP5      | ENSG00000139194 | -1.89 | 0.01 |
| RCCD1     | ENSG00000166965 | -1.67 | 0.02 |
| RCL1      | ENSG00000120158 | 1.44  | 0.05 |
| RCN3      | ENSG00000142552 | -1.96 | 0.00 |
| RCOR2     | ENSG00000167771 | -1.55 | 0.05 |
| REEP2     | ENSG00000132563 | -1.88 | 0.02 |
| REEP6     | ENSG00000115255 | -1.89 | 0.00 |
| RELL2     | ENSG00000164620 | 1.52  | 0.04 |
| RELT      | ENSG00000054967 | 1.37  | 0.04 |
| REXO1     | ENSG00000079313 | 1.3   | 0.04 |
| REXO5     | ENSG00000005189 | -1.84 | 0.00 |
| RFC2      | ENSG00000049541 | -1.61 | 0.04 |
| RGN       | ENSG00000130988 | -1.41 | 0.01 |
| RGS3      | ENSG00000138835 | 1.57  | 0.04 |
| RHBDD1    | ENSG00000144468 | 1.36  | 0.04 |
| RHBDF2    | ENSG00000129667 | 1.4   | 0.03 |
| RHBDL1    | ENSG00000103269 | -2.71 | 0.02 |
| RHBDL2    | ENSG00000158315 | -2.07 | 0.00 |
| RHBG      | ENSG00000132677 | -2.14 | 0.00 |
| RHOBTB1   | ENSG00000072422 | -1.59 | 0.00 |
| RHOBTB2   | ENSG00000008853 | -1.69 | 0.01 |
| RIMS3     | ENSG00000117016 | -1.69 | 0.00 |
| RIPK4     | ENSG00000183421 | -1.45 | 0.01 |

|            |                 |         |      |
|------------|-----------------|---------|------|
| RMI2       | ENSG00000175643 | -1.60   | 0.01 |
| RNASE4     | ENSG00000258818 | -1.32   | 0.01 |
| RNF122     | ENSG00000133874 | -1.51   | 0.02 |
| RNF144A    | ENSG00000151692 | -1.49   | 0.03 |
| RNF157     | ENSG00000141576 | -1.64   | 0.03 |
| RNF26      | ENSG00000173456 | -1.36   | 0.02 |
| RNFT1      | ENSG00000189050 | 1.52    | 0.02 |
| ROGDI      | ENSG00000067836 | -1.72   | 0.02 |
| ROR1       | ENSG00000185483 | -10.56  | 0.00 |
| RPARP-AS1  | ENSG00000269609 | -1.43   | 0.01 |
| RPF2       | ENSG00000197498 | 1.76    | 0.05 |
| RPS6KA5    | ENSG00000100784 | -2.62   | 0.03 |
| RPSAP69    | ENSG00000233487 | -1.78   | 0.00 |
| RRAGD      | ENSG00000025039 | -2.41   | 0.02 |
| RRP12      | ENSG00000052749 | 1.32    | 0.03 |
| RTCA       | ENSG00000137996 | 1.36    | 0.01 |
| RTN4       | ENSG00000115310 | 1.32    | 0.00 |
| RTN4R      | ENSG00000040608 | -2.64   | 0.04 |
| RTN4RL2    | ENSG00000186907 | -1.54   | 0.04 |
| S100A11    | ENSG00000163191 | 1.81    | 0.03 |
| S100A4     | ENSG00000196154 | -1.97   | 0.04 |
| SALL2      | ENSG00000165821 | -2.14   | 0.00 |
| SALL4      | ENSG00000101115 | -2.17   | 0.03 |
| SAT1       | ENSG00000130066 | 1.63    | 0.00 |
| SBF2-AS1   | ENSG00000246273 | 1.62    | 0.02 |
| SBK1       | ENSG00000188322 | -2.60   | 0.00 |
| SBK3       | ENSG00000231274 | 2.41    | 0.00 |
| SCAMP1     | ENSG00000085365 | 2.61    | 0.02 |
| SCARA3     | ENSG00000168077 | -2.41   | 0.00 |
| SCN1A      | ENSG00000144285 | -2.83   | 0.00 |
| SCN1B      | ENSG00000105711 | -2.04   | 0.02 |
| SCNN1D     | ENSG00000162572 | -1.67   | 0.02 |
| SCRN2      | ENSG00000141295 | -1.74   | 0.04 |
| SDC4       | ENSG00000124145 | 1.3     | 0.02 |
| SDCBP2-AS1 | ENSG00000234684 | -2.48   | 0.03 |
| SDK2       | ENSG00000069188 | -179.77 | 0.00 |
| SEBOX      | ENSG00000274529 | -1.79   | 0.00 |
| SECTM1     | ENSG00000141574 | -2.04   | 0.02 |
| SEH1L      | ENSG00000085415 | 1.43    | 0.03 |
| SEL1L3     | ENSG00000091490 | 2.67    | 0.00 |
| SELENOS    | ENSG00000131871 | 1.74    | 0.04 |
| SEMA4G     | ENSG00000095539 | -1.68   | 0.03 |
| SEMA6B     | ENSG00000167680 | -1.68   | 0.01 |
| SEMA6C     | ENSG00000143434 | -2.35   | 0.00 |
| SEPT6      | ENSG00000125354 | -1.87   | 0.00 |
| SEPT8      | ENSG00000164402 | -1.33   | 0.05 |

|            |                 |        |      |
|------------|-----------------|--------|------|
| SERP1      | ENSG00000120742 | 1.28   | 0.03 |
| SERPINA6   | ENSG00000170099 | -2.03  | 0.00 |
| SERPINA7   | ENSG00000123561 | -1.55  | 0.00 |
| SERPINB9   | ENSG00000170542 | 1.49   | 0.04 |
| SERPINC1   | ENSG00000117601 | -1.43  | 0.01 |
| SERPINE2   | ENSG00000135919 | 1.61   | 0.00 |
| SERTAD1    | ENSG00000197019 | 1.75   | 0.02 |
| SES3       | ENSG00000149212 | -4.14  | 0.02 |
| SETD7      | ENSG00000145391 | -12.55 | 0.00 |
| SETX       | ENSG00000107290 | 1.55   | 0.05 |
| SFN        | ENSG00000175793 | 2.38   | 0.00 |
| SFRP4      | ENSG00000106483 | -2.06  | 0.01 |
| SFXN2      | ENSG00000156398 | -1.38  | 0.01 |
| SFXN3      | ENSG00000107819 | -1.79  | 0.00 |
| SGTB       | ENSG00000197860 | 1.67   | 0.02 |
| SH2B1      | ENSG00000178188 | -1.43  | 0.01 |
| SH2B3      | ENSG00000111252 | 1.51   | 0.03 |
| SH2D4A     | ENSG00000104611 | -1.47  | 0.01 |
| SH2D5      | ENSG00000189410 | 2.55   | 0.00 |
| SH3GLB1    | ENSG00000097033 | 1.34   | 0.02 |
| SH3RF1     | ENSG00000154447 | 2.05   | 0.00 |
| SIDT2      | ENSG00000149577 | -1.49  | 0.03 |
| SIK2       | ENSG00000170145 | -1.39  | 0.02 |
| SIRPA      | ENSG00000198053 | -1.30  | 0.01 |
| SIRT7      | ENSG00000187531 | 1.62   | 0.00 |
| SLA2       | ENSG00000101082 | -3.66  | 0.02 |
| SLAIN1     | ENSG00000139737 | -4.44  | 0.01 |
| SLC11A2    | ENSG00000110911 | -1.33  | 0.04 |
| SLC12A5    | ENSG00000124140 | -2.13  | 0.02 |
| SLC12A9    | ENSG00000146828 | -1.35  | 0.04 |
| SLC13A3    | ENSG00000158296 | -1.54  | 0.00 |
| SLC13A5    | ENSG00000141485 | -1.74  | 0.00 |
| SLC16A13   | ENSG00000174327 | -1.40  | 0.00 |
| SLC16A6    | ENSG00000108932 | 5.7    | 0.00 |
| SLC17A5    | ENSG00000119899 | 1.41   | 0.02 |
| SLC20A1    | ENSG00000144136 | 2      | 0.00 |
| SLC22A17   | ENSG00000092096 | -2.51  | 0.01 |
| SLC22A18   | ENSG00000110628 | 2.06   | 0.02 |
| SLC22A18AS | ENSG00000254827 | 1.99   | 0.03 |
| SLC22A23   | ENSG00000137266 | -1.45  | 0.01 |
| SLC22A7    | ENSG00000137204 | -2.08  | 0.02 |
| SLC23A1    | ENSG00000170482 | -1.78  | 0.01 |
| SLC25A32   | ENSG00000164933 | 1.72   | 0.00 |
| SLC25A33   | ENSG00000171612 | -1.36  | 0.04 |
| SLC25A45   | ENSG00000162241 | -2.01  | 0.01 |
| SLC26A1    | ENSG00000145217 | 1.54   | 0.01 |

|                 |                 |         |      |
|-----------------|-----------------|---------|------|
| SLC26A9         | ENSG00000174502 | 2.02    | 0.01 |
| SLC28A1         | ENSG00000156222 | -2.13   | 0.01 |
| SLC29A1         | ENSG00000112759 | -1.36   | 0.04 |
| SLC29A2         | ENSG00000174669 | -2.14   | 0.00 |
| SLC29A4         | ENSG00000164638 | -2.04   | 0.01 |
| SLC2A4          | ENSG00000181856 | -1.61   | 0.00 |
| SLC30A10        | ENSG00000196660 | -1.85   | 0.01 |
| SLC35A4         | ENSG00000176087 | -1.73   | 0.02 |
| SLC35F1         | ENSG00000196376 | -142.02 | 0.00 |
| SLC35F2         | ENSG00000110660 | 1.49    | 0.00 |
| SLC35G2         | ENSG00000168917 | 1.86    | 0.01 |
| SLC37A4         | ENSG00000137700 | -1.72   | 0.01 |
| SLC38A1         | ENSG00000111371 | 1.59    | 0.05 |
| SLC38A3         | ENSG00000188338 | -1.53   | 0.02 |
| SLC39A10        | ENSG00000196950 | 2.22    | 0.01 |
| SLC39A11        | ENSG00000133195 | -1.31   | 0.04 |
| SLC39A5         | ENSG00000139540 | -1.47   | 0.02 |
| SLC41A2         | ENSG00000136052 | 1.74    | 0.03 |
| SLC44A2         | ENSG00000129353 | -1.91   | 0.00 |
| SLC5A11         | ENSG00000158865 | 3.99    | 0.00 |
| SLC5A9          | ENSG00000117834 | -1.93   | 0.00 |
| SLC6A12         | ENSG00000111181 | -4.29   | 0.01 |
| SLC6A15         | ENSG00000072041 | -266.87 | 0.00 |
| SLC6A4          | ENSG00000108576 | -1.58   | 0.01 |
| SLC6A6          | ENSG00000131389 | 2.06    | 0.02 |
| SLC6A8          | ENSG00000130821 | -1.58   | 0.01 |
| SLC6A9          | ENSG00000196517 | -1.68   | 0.01 |
| SLC7A1          | ENSG00000139514 | 1.43    | 0.03 |
| SLC7A11         | ENSG00000151012 | 2.73    | 0.04 |
| SLCO2B1         | ENSG00000137491 | -1.72   | 0.01 |
| SLCO4A1-<br>AS1 | ENSG00000232803 | -3.36   | 0.00 |
| SLIT2           | ENSG00000145147 | -147.03 | 0.00 |
| SLITRK5         | ENSG00000165300 | -167.73 | 0.00 |
| SMIM10L1        | ENSG00000256537 | 1.4     | 0.02 |
| SMIM13          | ENSG00000224531 | 1.47    | 0.04 |
| SMIM14          | ENSG00000163683 | 1.54    | 0.02 |
| SMIM24          | ENSG00000095932 | -2.38   | 0.00 |
| SMO             | ENSG00000128602 | -1.71   | 0.00 |
| SMPDL3A         | ENSG00000172594 | 1.61    | 0.04 |
| SMS             | ENSG00000102172 | 1.32    | 0.03 |
| SMTNL2          | ENSG00000188176 | -8.75   | 0.00 |
| SMURF1          | ENSG00000198742 | 1.4     | 0.01 |
| SNAI1           | ENSG00000124216 | 1.57    | 0.03 |
| SNAPC4          | ENSG00000165684 | 1.38    | 0.02 |
| SNIP1           | ENSG00000163877 | 1.23    | 0.04 |

|         |                 |         |      |
|---------|-----------------|---------|------|
| SNN     | ENSG00000184602 | -1.45   | 0.02 |
| SNTA1   | ENSG00000101400 | -1.62   | 0.00 |
| SNX1    | ENSG00000028528 | 1.32    | 0.03 |
| SNX12   | ENSG00000147164 | 1.43    | 0.04 |
| SNX25P1 | ENSG00000236809 | 1.91    | 0.05 |
| SOBP    | ENSG00000112320 | -1.48   | 0.01 |
| SOCS1   | ENSG00000185338 | -2.53   | 0.00 |
| SOCS3   | ENSG00000184557 | 2.95    | 0.01 |
| SOCS4   | ENSG00000180008 | 2.94    | 0.00 |
| SORD2P  | ENSG00000259479 | 1.61    | 0.03 |
| SOWAHA  | ENSG00000198944 | -5.28   | 0.00 |
| SOX7    | ENSG00000171056 | 1.53    | 0.03 |
| SP5     | ENSG00000204335 | -1.75   | 0.00 |
| SPARC   | ENSG00000113140 | -1.60   | 0.00 |
| SPG21   | ENSG00000090487 | 1.42    | 0.01 |
| SPINT2  | ENSG00000167642 | -5.06   | 0.03 |
| SPIRE2  | ENSG00000204991 | -1.59   | 0.01 |
| SPN     | ENSG00000197471 | -1.49   | 0.05 |
| SPP1    | ENSG00000118785 | 4.35    | 0.00 |
| SPRY4   | ENSG00000187678 | 1.87    | 0.00 |
| SPSB3   | ENSG00000162032 | -1.72   | 0.01 |
| SPTLC3  | ENSG00000172296 | -3.05   | 0.00 |
| SQSTM1  | ENSG00000161011 | 2.98    | 0.00 |
| SRD5A3  | ENSG00000128039 | -1.59   | 0.00 |
| SREBF1  | ENSG00000072310 | -1.47   | 0.00 |
| SREBF2  | ENSG00000198911 | -1.25   | 0.05 |
| SRP54   | ENSG00000100883 | 1.3     | 0.02 |
| SRPRB   | ENSG00000144867 | 1.36    | 0.01 |
| SRXN1   | ENSG00000271303 | 5.44    | 0.00 |
| SRY     | ENSG00000184895 | -2.93   | 0.01 |
| SSB     | ENSG00000138385 | 1.76    | 0.03 |
| SSBP3   | ENSG00000157216 | -1.29   | 0.04 |
| SSC4D   | ENSG00000146700 | -1.91   | 0.01 |
| SSR3    | ENSG00000114850 | 1.35    | 0.03 |
| ST3GAL1 | ENSG00000008513 | -1.39   | 0.02 |
| ST3GAL5 | ENSG00000115525 | -2.16   | 0.01 |
| ST6GAL1 | ENSG00000073849 | 1.23    | 0.04 |
| STAM    | ENSG00000136738 | 1.57    | 0.01 |
| STAR    | ENSG00000147465 | -1.89   | 0.02 |
| STARD13 | ENSG00000133121 | -1.36   | 0.03 |
| STAT2   | ENSG00000170581 | -1.54   | 0.00 |
| STC2    | ENSG00000113739 | 1.36    | 0.04 |
| STRA6   | ENSG00000137868 | -2.83   | 0.00 |
| STRAP   | ENSG00000023734 | 1.45    | 0.01 |
| STX3    | ENSG00000166900 | 2.36    | 0.00 |
| SULF1   | ENSG00000137573 | -148.06 | 0.00 |

|          |                 |       |      |
|----------|-----------------|-------|------|
| SULT1A1  | ENSG00000196502 | 1.74  | 0.02 |
| SULT1A2  | ENSG00000197165 | 2.05  | 0.00 |
| SUSD3    | ENSG00000157303 | -2.17 | 0.02 |
| SV2A     | ENSG00000159164 | -1.82 | 0.00 |
| SYNE1    | ENSG00000131018 | -1.53 | 0.03 |
| SYNE2    | ENSG00000054654 | -2.43 | 0.02 |
| SYNGR1   | ENSG00000100321 | -4.23 | 0.01 |
| SYNJ2    | ENSG00000078269 | 1.4   | 0.04 |
| SYPL2    | ENSG00000143028 | -2.38 | 0.04 |
| SYT7     | ENSG00000011347 | -2.23 | 0.00 |
| TAB1     | ENSG00000100324 | -1.46 | 0.01 |
| TACC3    | ENSG00000013810 | -1.41 | 0.01 |
| TADA1    | ENSG00000152382 | -1.38 | 0.01 |
| TAF6     | ENSG00000106290 | -1.40 | 0.04 |
| TAGLN3   | ENSG00000144834 | 21.2  | 0.00 |
| TALDO1   | ENSG00000177156 | 2.05  | 0.00 |
| TANC2    | ENSG00000170921 | -7.46 | 0.00 |
| TAPBP    | ENSG00000231925 | -1.31 | 0.04 |
| TAS1R1   | ENSG00000173662 | -2.13 | 0.03 |
| TAT      | ENSG00000198650 | 2.15  | 0.00 |
| TAX1BP1  | ENSG00000106052 | 1.51  | 0.03 |
| TBC1D13  | ENSG00000107021 | -1.27 | 0.03 |
| TBC1D9   | ENSG00000109436 | -1.26 | 0.04 |
| TBK1     | ENSG00000183735 | 1.6   | 0.03 |
| TBL1X    | ENSG00000101849 | -1.49 | 0.00 |
| TBL1Y    | ENSG00000092377 | -2.06 | 0.01 |
| TBX2     | ENSG00000121068 | -2.16 | 0.00 |
| TBX2-AS1 | ENSG00000267280 | -2.75 | 0.01 |
| TCEA3    | ENSG00000204219 | -1.95 | 0.00 |
| TCF19    | ENSG00000137310 | -1.39 | 0.01 |
| TCTN2    | ENSG00000168778 | -1.65 | 0.03 |
| TEF      | ENSG00000167074 | -2.11 | 0.00 |
| TEFM     | ENSG00000172171 | 1.46  | 0.04 |
| TESK2    | ENSG00000070759 | -1.92 | 0.00 |
| TEX19    | ENSG00000182459 | 2.64  | 0.00 |
| TFB2M    | ENSG00000162851 | 1.46  | 0.03 |
| TFE3     | ENSG00000068323 | 1.48  | 0.00 |
| TFF3     | ENSG00000160180 | -1.93 | 0.03 |
| TFP1     | ENSG00000242337 | -1.47 | 0.00 |
| TFPI     | ENSG00000003436 | 1.39  | 0.02 |
| TFR2     | ENSG00000106327 | -1.51 | 0.04 |
| TFRC     | ENSG00000072274 | 1.43  | 0.03 |
| TGFB1    | ENSG00000105329 | 1.45  | 0.03 |
| TGIF2    | ENSG00000118707 | 1.43  | 0.03 |
| THAP1    | ENSG00000131931 | 1.47  | 0.01 |
| THBS3    | ENSG00000169231 | -1.88 | 0.04 |



|           |                 |         |      |
|-----------|-----------------|---------|------|
| THOC6     | ENSG00000131652 | -1.61   | 0.01 |
| TIAM1     | ENSG00000156299 | -184.82 | 0.00 |
| TICAM1    | ENSG00000127666 | 1.44    | 0.03 |
| TICRR     | ENSG00000140534 | -1.54   | 0.01 |
| TIGAR     | ENSG00000078237 | 1.62    | 0.01 |
| TIGD3     | ENSG00000173825 | -2.38   | 0.01 |
| TIMELESS  | ENSG00000111602 | -1.30   | 0.05 |
| TIMM17A   | ENSG00000134375 | 1.36    | 0.02 |
| TIMP1     | ENSG00000102265 | 2.1     | 0.01 |
| TIMP3     | ENSG00000100234 | -1.52   | 0.00 |
| TINAG     | ENSG00000137251 | 7.64    | 0.00 |
| TJP3      | ENSG00000105289 | -3.43   | 0.00 |
| TK1       | ENSG00000167900 | -1.56   | 0.02 |
| TKT       | ENSG00000163931 | 1.47    | 0.02 |
| TLCD1     | ENSG00000160606 | -2.03   | 0.02 |
| TLE1      | ENSG00000196781 | -1.33   | 0.02 |
| TLE4      | ENSG00000106829 | -8.11   | 0.00 |
| TLN2      | ENSG00000171914 | -1.57   | 0.01 |
| TM4SF1    | ENSG00000169908 | 1.34    | 0.05 |
| TMC8      | ENSG00000167895 | 2.18    | 0.00 |
| TMCC1     | ENSG00000172765 | 1.7     | 0.00 |
| TMEM106C  | ENSG00000134291 | -1.56   | 0.05 |
| TMEM107   | ENSG00000179029 | -1.62   | 0.04 |
| TMEM126B  | ENSG00000171204 | 1.35    | 0.03 |
| TMEM139   | ENSG00000178826 | -1.95   | 0.01 |
| TMEM198B  | ENSG00000182796 | -2.13   | 0.01 |
| TMEM2     | ENSG00000135048 | 1.75    | 0.02 |
| TMEM200B  | ENSG00000253304 | -2.27   | 0.03 |
| TMEM214   | ENSG00000119777 | 1.3     | 0.03 |
| TMEM268   | ENSG00000157693 | 2.81    | 0.02 |
| TMEM33    | ENSG00000109133 | 3.11    | 0.02 |
| TMEM52    | ENSG00000178821 | -1.72   | 0.01 |
| TMEM87B   | ENSG00000153214 | 2.07    | 0.04 |
| TMEM8B    | ENSG00000137103 | -1.62   | 0.04 |
| TMEM94    | ENSG00000177728 | -1.64   | 0.01 |
| TMOD2     | ENSG00000128872 | -4.44   | 0.03 |
| TMPRSS2   | ENSG00000184012 | -2.20   | 0.01 |
| TMPRSS6   | ENSG00000187045 | -1.97   | 0.00 |
| TMPRSS9   | ENSG00000178297 | -1.74   | 0.02 |
| TMX3      | ENSG00000166479 | 1.82    | 0.03 |
| TNFRSF10A | ENSG00000104689 | 1.67    | 0.00 |
| TNFRSF10B | ENSG00000120889 | 1.28    | 0.01 |
| TNFRSF10D | ENSG00000173530 | 1.72    | 0.00 |
| TNFRSF19  | ENSG00000127863 | -1.42   | 0.05 |
| TNFRSF1A  | ENSG00000067182 | 1.64    | 0.01 |
| TNFRSF21  | ENSG00000146072 | 1.39    | 0.03 |

|            |                 |        |      |
|------------|-----------------|--------|------|
| TNFSF9     | ENSG00000125657 | 2.41   | 0.00 |
| TNNC1      | ENSG00000114854 | -2.75  | 0.01 |
| TNNI2      | ENSG00000130598 | -2.95  | 0.00 |
| TNNT1      | ENSG00000105048 | -2.53  | 0.04 |
| TNRC18     | ENSG00000182095 | -1.38  | 0.01 |
| TNRC6C-AS1 | ENSG00000204282 | 1.49   | 0.02 |
| TNS4       | ENSG00000131746 | 3.53   | 0.00 |
| TNXB       | ENSG00000168477 | -1.30  | 0.03 |
| TOB1-AS1   | ENSG00000229980 | -1.88  | 0.03 |
| TOMM34     | ENSG00000025772 | 1.47   | 0.01 |
| TOP1       | ENSG00000198900 | 1.62   | 0.01 |
| TOR1AIP1   | ENSG00000143337 | 1.47   | 0.04 |
| TP53I3     | ENSG00000115129 | -1.46  | 0.04 |
| TP53INP2   | ENSG00000078804 | -1.43  | 0.00 |
| TPBG       | ENSG00000146242 | -1.82  | 0.03 |
| TPGS2      | ENSG00000134779 | -1.45  | 0.03 |
| TRAF3IP2   | ENSG00000056972 | -1.40  | 0.02 |
| TRIB1      | ENSG00000173334 | 1.84   | 0.00 |
| TRIM26     | ENSG00000234127 | -1.26  | 0.03 |
| TRIM45     | ENSG00000134253 | -1.78  | 0.03 |
| TRIM54     | ENSG00000138100 | 33.45  | 0.00 |
| TRIM74     | ENSG00000155428 | -3.76  | 0.00 |
| TRNP1      | ENSG00000253368 | 1.42   | 0.02 |
| TRNT1      | ENSG00000072756 | 1.79   | 0.01 |
| TROAP      | ENSG00000135451 | -1.57  | 0.01 |
| TRPV1      | ENSG00000196689 | -1.56  | 0.03 |
| TSC2       | ENSG00000103197 | -1.37  | 0.04 |
| TSC22D1    | ENSG00000102804 | -1.33  | 0.01 |
| TSC22D3    | ENSG00000157514 | -10.41 | 0.00 |
| TSKU       | ENSG00000182704 | 1.86   | 0.00 |
| TSR1       | ENSG00000167721 | 1.3    | 0.00 |
| TTBK1      | ENSG00000146216 | -3.10  | 0.04 |
| TTC23      | ENSG00000103852 | -1.57  | 0.03 |
| TTC27      | ENSG00000018699 | 1.34   | 0.02 |
| TTC39C     | ENSG00000168234 | 1.56   | 0.03 |
| TTR        | ENSG00000118271 | -1.62  | 0.01 |
| TTYH1      | ENSG00000167614 | -1.89  | 0.00 |
| TUBB1      | ENSG00000101162 | -1.93  | 0.00 |
| TUBB8P12   | ENSG00000173213 | -2.77  | 0.01 |
| TUSC3      | ENSG00000104723 | -3.10  | 0.02 |
| TXN        | ENSG00000136810 | 1.83   | 0.00 |
| TXNRD1     | ENSG00000198431 | 5.86   | 0.00 |
| TYMSOS     | ENSG00000176912 | -1.79  | 0.02 |
| UBA7       | ENSG00000182179 | -1.80  | 0.00 |
| UBASH3B    | ENSG00000154127 | 2.46   | 0.00 |
| UBE2C      | ENSG00000175063 | -1.38  | 0.02 |

|         |                 |        |      |
|---------|-----------------|--------|------|
| UBE2D3  | ENSG00000109332 | 1.22   | 0.04 |
| UBE2E3  | ENSG00000170035 | 1.42   | 0.01 |
| UBE2K   | ENSG00000078140 | 1.64   | 0.00 |
| UBE2L6  | ENSG00000156587 | -1.69  | 0.01 |
| UBE2SP1 | ENSG00000233966 | -1.71  | 0.03 |
| UBOX5   | ENSG00000185019 | 1.32   | 0.00 |
| UBXN8   | ENSG00000104691 | 1.47   | 0.02 |
| UCHL1   | ENSG00000154277 | -30.27 | 0.01 |
| UCHL5   | ENSG00000116750 | 1.37   | 0.04 |
| UCP2    | ENSG00000175567 | -1.82  | 0.03 |
| UGDH    | ENSG00000109814 | 3.55   | 0.00 |
| UGGT2   | ENSG00000102595 | 1.67   | 0.01 |
| UNC13D  | ENSG00000092929 | -1.40  | 0.03 |
| UNC5B   | ENSG00000107731 | -53.08 | 0.00 |
| UPK3A   | ENSG00000100373 | -2.46  | 0.00 |
| UPP1    | ENSG00000183696 | 1.97   | 0.01 |
| UROC1   | ENSG00000159650 | -4.76  | 0.01 |
| USP15   | ENSG00000135655 | 1.36   | 0.05 |
| USP30   | ENSG00000135093 | -1.75  | 0.00 |
| USP36   | ENSG00000055483 | 1.34   | 0.03 |
| UTP11   | ENSG00000183520 | 1.68   | 0.04 |
| UTP14A  | ENSG00000156697 | 1.52   | 0.01 |
| UTP15   | ENSG00000164338 | 1.48   | 0.04 |
| UTP18   | ENSG00000011260 | 1.37   | 0.05 |
| UTP4    | ENSG00000141076 | 1.26   | 0.05 |
| UTP6    | ENSG00000108651 | 1.33   | 0.01 |
| VAPA    | ENSG00000101558 | 1.44   | 0.01 |
| VASH1   | ENSG00000071246 | -3.73  | 0.02 |
| VASN    | ENSG00000168140 | -1.45  | 0.05 |
| VASP    | ENSG00000125753 | 1.48   | 0.00 |
| VAV3    | ENSG00000134215 | -1.92  | 0.00 |
| VILL    | ENSG00000136059 | -2.01  | 0.03 |
| VIM     | ENSG00000026025 | -83.29 | 0.00 |
| VMP1    | ENSG00000062716 | 1.56   | 0.00 |
| VNN1    | ENSG00000112299 | 2.17   | 0.01 |
| VPS37A  | ENSG00000155975 | 1.79   | 0.01 |
| VPS37D  | ENSG00000176428 | -2.01  | 0.00 |
| VPS45   | ENSG00000136631 | -1.42  | 0.01 |
| VPS51   | ENSG00000149823 | -1.61  | 0.03 |
| VSIG10  | ENSG00000176834 | -1.42  | 0.03 |
| VSNL1   | ENSG00000163032 | -1.44  | 0.00 |
| VWA1    | ENSG00000179403 | -1.56  | 0.04 |
| WASH7P  | ENSG00000227232 | -1.47  | 0.03 |
| WASHC1  | ENSG00000181404 | -1.44  | 0.03 |
| WDFY2   | ENSG00000139668 | -1.39  | 0.01 |
| WDR12   | ENSG00000138442 | 1.23   | 0.04 |

|           |                 |         |      |
|-----------|-----------------|---------|------|
| WDR3      | ENSG00000065183 | 1.45    | 0.04 |
| WDR34     | ENSG00000119333 | -1.77   | 0.01 |
| WDR43     | ENSG00000163811 | 1.44    | 0.03 |
| WDR92     | ENSG00000243667 | 1.44    | 0.04 |
| WDTC1     | ENSG00000142784 | -1.24   | 0.04 |
| WHRN      | ENSG00000095397 | -1.83   | 0.00 |
| WLS       | ENSG00000116729 | -182.28 | 0.00 |
| WNT11     | ENSG00000085741 | -12.55  | 0.02 |
| WSB2      | ENSG00000176871 | 1.44    | 0.01 |
| WSCD1     | ENSG00000179314 | -4.99   | 0.01 |
| WTIP      | ENSG00000142279 | -1.64   | 0.02 |
| WWC3      | ENSG00000047644 | 1.48    | 0.03 |
| XIST      | ENSG00000229807 | -464.65 | 0.00 |
| XPNPEP2   | ENSG00000122121 | -1.87   | 0.01 |
| XPO5      | ENSG00000124571 | 1.24    | 0.03 |
| XRCC1     | ENSG00000073050 | -1.28   | 0.03 |
| XRCC3     | ENSG00000126215 | -1.43   | 0.01 |
| XXYLT1    | ENSG00000173950 | 1.35    | 0.01 |
| YBX3      | ENSG00000060138 | 1.44    | 0.02 |
| YIPF6     | ENSG00000181704 | 4.95    | 0.02 |
| YPEL3     | ENSG00000090238 | -1.74   | 0.02 |
| YRDC      | ENSG00000196449 | 1.57    | 0.00 |
| YWHAG     | ENSG00000170027 | 1.34    | 0.03 |
| YWHAZ     | ENSG00000164924 | 1.37    | 0.04 |
| Z98200.1  | ENSG00000271734 | 1.69    | 0.01 |
| ZBTB2     | ENSG00000181472 | 1.32    | 0.02 |
| ZBTB22    | ENSG00000236104 | -1.52   | 0.02 |
| ZC3H6     | ENSG00000188177 | -3.46   | 0.02 |
| ZDHHC9    | ENSG00000188706 | 1.43    | 0.02 |
| ZER1      | ENSG00000160445 | -1.33   | 0.01 |
| ZFAND2B   | ENSG00000158552 | -1.92   | 0.00 |
| ZFAND5    | ENSG00000107372 | 1.96    | 0.00 |
| ZFP14     | ENSG00000142065 | -1.89   | 0.02 |
| ZFP36L1   | ENSG00000185650 | 1.52    | 0.02 |
| ZFPM2-AS1 | ENSG00000251003 | 2.16    | 0.04 |
| ZGPAT     | ENSG00000197114 | -1.55   | 0.01 |
| ZMIZ1-AS1 | ENSG00000224596 | 4.06    | 0.01 |
| ZMPSTE24  | ENSG00000084073 | 1.69    | 0.02 |
| ZMYM3     | ENSG00000147130 | -1.53   | 0.01 |
| ZNF16     | ENSG00000170631 | -1.39   | 0.04 |
| ZNF219    | ENSG00000165804 | -1.42   | 0.04 |
| ZNF22     | ENSG00000165512 | -15.45  | 0.00 |
| ZNF230    | ENSG00000159882 | -1.66   | 0.04 |
| ZNF362    | ENSG00000160094 | -1.91   | 0.00 |
| ZNF395    | ENSG00000186918 | -1.37   | 0.03 |
| ZNF439    | ENSG00000171291 | -1.64   | 0.03 |

|        |                 |       |      |
|--------|-----------------|-------|------|
| ZNF496 | ENSG00000162714 | -1.45 | 0.02 |
| ZNF554 | ENSG00000172006 | -1.58 | 0.03 |
| ZNF57  | ENSG00000171970 | -1.57 | 0.03 |
| ZNF608 | ENSG00000168916 | -1.93 | 0.02 |
| ZNF697 | ENSG00000143067 | 1.75  | 0.00 |
| ZNF714 | ENSG00000160352 | -3.14 | 0.04 |
| ZNF724 | ENSG00000196081 | -1.75 | 0.00 |
| ZNF746 | ENSG00000181220 | 1.45  | 0.03 |
| ZNF792 | ENSG00000180884 | -1.64 | 0.01 |
| ZNF839 | ENSG00000022976 | -1.88 | 0.04 |
| ZNF850 | ENSG00000267041 | -2.71 | 0.00 |
| ZNFX1  | ENSG00000124201 | 1.31  | 0.04 |
| ZNHIT6 | ENSG00000117174 | 1.34  | 0.04 |
| ZSWIM1 | ENSG00000168612 | -1.48 | 0.01 |

<sup>1</sup>Fold change of SF treated cells compared to DMSO control

<sup>2</sup>adjusted p-values (q-values) were determined through Benjamini-Hochberg
