# Supplementary material for: Sulforaphane rewires central metabolism to support antioxidant response and achieve glucose homeostasis
Source: PubMed Central journal article supplement — Redox Biol. 2023 Sep 7;67:102878. doi: 10.1016/j.redox.2023.102878 (PMC10502441; doi:10.1016/j.redox.2023.102878), 2023-09-07
Supplement: mmc7.pdf [file mmc7.pdf]

**Supplementary Table 3.**

Complete set of differentially expressed genes in response to SF in the HG compared to DMSO control in HepG2 cells.

| Gene Symbol | Ensembl ID      | High Glucose                |                     |
|-------------|-----------------|-----------------------------|---------------------|
|             |                 | Fold <sup>1</sup><br>Change | qvalue <sup>2</sup> |
| AAAS        | ENSG00000094914 | -1.47                       | 0.02                |
| AATF        | ENSG00000275700 | 1.33                        | 0.02                |
| ABCB1       | ENSG00000085563 | 1.72                        | 0.00                |
| ABCB4       | ENSG00000005471 | -1.42                       | 0.04                |
| ABCC1       | ENSG00000103222 | 1.6                         | 0.01                |
| ABCC2       | ENSG00000023839 | 2.1                         | 0.00                |
| ABCC3       | ENSG00000108846 | 3.3                         | 0.00                |
| ABCC6       | ENSG00000091262 | -1.36                       | 0.03                |
| ABCC6P1     | ENSG00000256340 | -1.54                       | 0.01                |
| ABCF2       | ENSG00000033050 | 1.39                        | 0.03                |
| ABCG2       | ENSG00000118777 | 1.55                        | 0.00                |
| ABCG8       | ENSG00000143921 | -1.72                       | 0.01                |
| ABHD4       | ENSG00000100439 | 2.39                        | 0.00                |
| AC002546.1  | ENSG00000267194 | -4.38                       | 0.02                |
| AC004148.2  | ENSG00000263272 | 1.36                        | 0.02                |
| AC005329.1  | ENSG00000248015 | -2.11                       | 0.01                |
| AC005562.1  | ENSG00000214719 | -1.77                       | 0.00                |
| AC006486.2  | ENSG00000279539 | 2.17                        | 0.04                |
| AC007318.1  | ENSG00000172974 | 1.37                        | 0.02                |
| AC011043.2  | ENSG00000278198 | -1.60                       | 0.02                |
| AC011297.1  | ENSG00000273906 | -2.39                       | 0.03                |
| AC022149.1  | ENSG00000269378 | 1.51                        | 0.01                |
| AC023157.3  | ENSG00000276900 | 2.3                         | 0.02                |
| AC025180.1  | ENSG00000249899 | 11.24                       | 0.02                |
| AC079594.2  | ENSG00000248710 | -1.66                       | 0.05                |
| AC080128.1  | ENSG00000244062 | -2.17                       | 0.00                |
| AC083809.1  | ENSG00000277247 | 2.03                        | 0.02                |
| AC083841.1  | ENSG00000253196 | -2.04                       | 0.01                |
| AC090907.1  | ENSG00000259376 | 1.82                        | 0.04                |
| AC091173.1  | ENSG00000251127 | 7.3                         | 0.03                |
| AC098934.2  | ENSG00000234996 | -2.19                       | 0.05                |
| AC099548.2  | ENSG00000253882 | 1.71                        | 0.03                |
| AC099850.3  | ENSG00000265415 | -1.99                       | 0.05                |
| AC110285.7  | ENSG00000279692 | -2.83                       | 0.00                |
| AC120057.4  | ENSG00000279641 | 2.51                        | 0.03                |
| AC126755.3  | ENSG00000257527 | 1.24                        | 0.05                |
| AC240274.1  | ENSG00000271254 | -1.71                       | 0.02                |
| AC243964.2  | ENSG00000266903 | -1.64                       | 0.03                |
| AC243965.2  | ENSG00000275552 | 4.85                        | 0.01                |

|            |                 |       |      |
|------------|-----------------|-------|------|
| ACACA      | ENSG00000278540 | -1.42 | 0.04 |
| ACBD7      | ENSG00000176244 | -2.38 | 0.02 |
| ACSL1      | ENSG00000151726 | -1.47 | 0.00 |
| ACSL5      | ENSG00000197142 | 1.87  | 0.00 |
| ACSM2A     | ENSG00000183747 | -1.75 | 0.03 |
| ACSM3      | ENSG00000005187 | -2.99 | 0.03 |
| ACSS1      | ENSG00000154930 | -1.73 | 0.01 |
| ACTB       | ENSG00000075624 | 1.66  | 0.01 |
| ACTR3      | ENSG00000115091 | 1.4   | 0.01 |
| ACVR1      | ENSG00000115170 | 1.68  | 0.00 |
| ACY3       | ENSG00000132744 | -2.53 | 0.00 |
| ADAMTS13   | ENSG00000160323 | -2.38 | 0.01 |
| ADAMTSL4-  |                 |       |      |
| AS1        | ENSG00000203804 | 1.69  | 0.01 |
| ADCY6      | ENSG00000174233 | -1.48 | 0.02 |
| ADD1       | ENSG00000087274 | -1.43 | 0.02 |
| ADGRD1     | ENSG00000111452 | -2.19 | 0.04 |
| ADGRG1     | ENSG00000205336 | -1.73 | 0.01 |
| ADGRL1     | ENSG00000072071 | -2.20 | 0.01 |
| ADH6       | ENSG00000172955 | -1.61 | 0.00 |
| ADM        | ENSG00000148926 | 2.05  | 0.03 |
| ADRM1      | ENSG00000130706 | 1.54  | 0.04 |
| AFMID      | ENSG00000183077 | -1.42 | 0.04 |
| AFP        | ENSG00000081051 | -1.85 | 0.00 |
| AGBL5      | ENSG00000084693 | -1.40 | 0.00 |
| AGXT       | ENSG00000172482 | -1.84 | 0.00 |
| AIFM2      | ENSG00000042286 | 2     | 0.01 |
| AIMP2      | ENSG00000106305 | 1.38  | 0.03 |
| AKAP12     | ENSG00000131016 | 2.68  | 0.00 |
| AKNA       | ENSG00000106948 | -1.68 | 0.05 |
| AKR1B10    | ENSG00000198074 | 11.93 | 0.00 |
| AKR1B10P1  | ENSG00000213606 | 6.4   | 0.00 |
| AKR1C1     | ENSG00000187134 | 5.04  | 0.00 |
| AKR1C2     | ENSG00000151632 | 8.51  | 0.00 |
| AKR1D1     | ENSG00000122787 | -2.14 | 0.01 |
| AKTIP      | ENSG00000166971 | -1.39 | 0.04 |
| AL031058.1 | ENSG00000261189 | 2.34  | 0.00 |
| AL034549.2 | ENSG00000276073 | -2.33 | 0.02 |
| AL109615.3 | ENSG00000237686 | -3.03 | 0.01 |
| AL121832.3 | ENSG00000275437 | -2.27 | 0.02 |
| AL161669.1 | ENSG00000259444 | -1.74 | 0.01 |
| AL355338.1 | ENSG00000274605 | 1.93  | 0.02 |
| AL357060.3 | ENSG00000237499 | -2.58 | 0.02 |
| AL365181.3 | ENSG00000272405 | 1.28  | 0.02 |
| AL365203.1 | ENSG00000229656 | 4.82  | 0.02 |
| AL390195.1 | ENSG00000243960 | 1.39  | 0.02 |

|            |                 |       |      |
|------------|-----------------|-------|------|
| AL391832.2 | ENSG00000238005 | 2.2   | 0.04 |
| AL445524.1 | ENSG00000233461 | 2.13  | 0.02 |
| AL590004.4 | ENSG00000260604 | 2.42  | 0.00 |
| AL731684.1 | ENSG00000225532 | 11.13 | 0.03 |
| AL845321.1 | ENSG00000228522 | 2.08  | 0.00 |
| ALAD       | ENSG00000148218 | -1.35 | 0.02 |
| ALB        | ENSG00000163631 | -1.39 | 0.02 |
| ALDH18A1   | ENSG00000059573 | -1.24 | 0.05 |
| ALDH1A1    | ENSG00000165092 | 1.73  | 0.00 |
| ALDH1L1    | ENSG00000144908 | 2.28  | 0.00 |
| ALDH3B1    | ENSG00000006534 | -2.31 | 0.00 |
| ALDH6A1    | ENSG00000119711 | -1.80 | 0.00 |
| ALDH7A1    | ENSG00000164904 | -1.33 | 0.03 |
| ALDH9A1    | ENSG00000143149 | -1.38 | 0.01 |
| ALDOA      | ENSG00000149925 | 1.59  | 0.01 |
| AMBRA1     | ENSG00000110497 | -1.34 | 0.04 |
| AMDHD1     | ENSG00000139344 | -2.38 | 0.00 |
| AMER1      | ENSG00000184675 | -1.49 | 0.05 |
| AMN1       | ENSG00000151743 | 1.79  | 0.02 |
| AMZ2P1     | ENSG00000214174 | -1.68 | 0.05 |
| ANGPTL1    | ENSG00000116194 | -2.23 | 0.00 |
| ANGPTL2    | ENSG00000136859 | 1.62  | 0.04 |
| ANGPTL8    | ENSG00000130173 | 2.12  | 0.00 |
| ANKRD13A   | ENSG00000076513 | -1.33 | 0.04 |
| ANKRD13B   | ENSG00000198720 | 1.83  | 0.01 |
| ANKRD65    | ENSG00000235098 | -1.73 | 0.02 |
| ANO8       | ENSG00000074855 | -1.87 | 0.02 |
| ANPEP      | ENSG00000166825 | -1.45 | 0.02 |
| ANTXR1     | ENSG00000169604 | -1.55 | 0.01 |
| ANTXR2     | ENSG00000163297 | 1.56  | 0.02 |
| ANXA2      | ENSG00000182718 | 1.76  | 0.00 |
| ANXA9      | ENSG00000143412 | -1.51 | 0.02 |
| AOC3       | ENSG00000131471 | -1.40 | 0.01 |
| AOC4P      | ENSG00000260105 | -2.38 | 0.01 |
| AP000777.3 | ENSG00000256813 | -3.66 | 0.04 |
| AP001065.1 | ENSG00000228709 | -1.55 | 0.05 |
| AP002478.1 | ENSG00000266401 | 4.31  | 0.04 |
| AP006285.1 | ENSG00000227306 | -1.67 | 0.05 |
| AP3S2      | ENSG00000157823 | -1.29 | 0.03 |
| APAF1      | ENSG00000120868 | -1.53 | 0.03 |
| APOBEC3A   | ENSG00000128383 | -1.78 | 0.00 |
| APOBEC3C   | ENSG00000244509 | -1.62 | 0.00 |
| APOBEC3G   | ENSG00000239713 | -2.19 | 0.01 |
| APOC3      | ENSG00000110245 | -1.46 | 0.04 |
| APOH       | ENSG00000091583 | -1.58 | 0.00 |
| AQP11      | ENSG00000178301 | -1.51 | 0.01 |

|             |                 |       |      |
|-------------|-----------------|-------|------|
| AQP3        | ENSG00000165272 | 2.63  | 0.01 |
| AQP7P1      | ENSG00000186466 | 1.96  | 0.04 |
| ARAP2       | ENSG00000047365 | 4.9   | 0.02 |
| AREG        | ENSG00000109321 | 2.32  | 0.00 |
| ARHGAP33    | ENSG00000004777 | -2.01 | 0.01 |
| ARHGAP5-AS1 | ENSG00000258655 | 1.79  | 0.01 |
| ARHGEF17    | ENSG00000110237 | -1.43 | 0.05 |
| ARHGEF39    | ENSG00000137135 | -1.46 | 0.03 |
| ARHGEF40    | ENSG00000165801 | -1.60 | 0.00 |
| ARNTL       | ENSG00000133794 | -1.58 | 0.03 |
| ARSB        | ENSG00000113273 | 1.8   | 0.00 |
| ARSI        | ENSG00000183876 | -3.48 | 0.00 |
| ART4        | ENSG00000111339 | -1.67 | 0.00 |
| ASAH2       | ENSG00000188611 | -1.82 | 0.03 |
| ASAP2       | ENSG00000151693 | 1.7   | 0.03 |
| ASAP3       | ENSG00000088280 | -1.68 | 0.01 |
| ASB4        | ENSG00000005981 | 1.75  | 0.00 |
| ASF1A       | ENSG00000111875 | 1.64  | 0.02 |
| ASF1B       | ENSG00000105011 | -1.84 | 0.00 |
| ASPDH       | ENSG00000204653 | 1.59  | 0.04 |
| ASPH        | ENSG00000198363 | 1.91  | 0.00 |
| ASPSCR1     | ENSG00000169696 | -1.41 | 0.02 |
| ATG16L1     | ENSG00000085978 | 1.33  | 0.02 |
| ATIC        | ENSG00000138363 | 1.39  | 0.01 |
| ATP10D      | ENSG00000145246 | -1.57 | 0.04 |
| ATP1A3      | ENSG00000105409 | -9.78 | 0.03 |
| ATP6V1E1    | ENSG00000131100 | 1.59  | 0.00 |
| ATPAF1      | ENSG00000123472 | -1.48 | 0.03 |
| AURKA       | ENSG00000087586 | -1.31 | 0.03 |
| AXL         | ENSG00000167601 | 1.58  | 0.05 |
| B4GALNT1    | ENSG00000135454 | 2.75  | 0.00 |
| B4GALNT3    | ENSG00000139044 | 1.9   | 0.01 |
| B4GALNT4    | ENSG00000182272 | -1.55 | 0.02 |
| BACE1       | ENSG00000186318 | -1.43 | 0.05 |
| BAG2        | ENSG00000112208 | 1.85  | 0.00 |
| BAG3        | ENSG00000151929 | 1.44  | 0.01 |
| BAHCC1      | ENSG00000266074 | -1.89 | 0.03 |
| BAK1        | ENSG00000030110 | 1.34  | 0.04 |
| BBS2        | ENSG00000125124 | -1.29 | 0.04 |
| BCAM        | ENSG00000187244 | -1.72 | 0.00 |
| BCAS3       | ENSG00000141376 | -1.35 | 0.03 |
| BCORL1      | ENSG00000085185 | -1.91 | 0.00 |
| BEAN1-AS1   | ENSG00000261656 | -1.88 | 0.03 |
| BHMT2       | ENSG00000132840 | 3.21  | 0.00 |
| BICDL1      | ENSG00000135127 | 1.74  | 0.01 |
| BIRC7       | ENSG00000101197 | 2.89  | 0.00 |

|          |                 |       |      |
|----------|-----------------|-------|------|
| BMF      | ENSG00000104081 | -3.84 | 0.01 |
| BMP8B    | ENSG00000116985 | -2.60 | 0.03 |
| BOK-AS1  | ENSG00000234235 | -2.14 | 0.01 |
| BOP1     | ENSG00000261236 | 1.77  | 0.02 |
| BORA     | ENSG00000136122 | -1.52 | 0.04 |
| BRD3     | ENSG00000169925 | -1.33 | 0.05 |
| BRD8     | ENSG00000112983 | -1.32 | 0.03 |
| BTBD11   | ENSG00000151136 | 1.5   | 0.02 |
| BTG2     | ENSG00000159388 | -1.41 | 0.03 |
| BUB1     | ENSG00000169679 | -1.41 | 0.02 |
| BUB1B    | ENSG00000156970 | -1.45 | 0.02 |
| BUD23    | ENSG00000071462 | 1.39  | 0.02 |
| BZW2     | ENSG00000136261 | 1.39  | 0.01 |
| C11orf95 | ENSG00000188070 | -2.19 | 0.00 |
| C12orf29 | ENSG00000133641 | 1.49  | 0.02 |
| C12orf49 | ENSG00000111412 | -1.34 | 0.02 |
| C16orf89 | ENSG00000153446 | -2.35 | 0.02 |
| C1orf115 | ENSG00000162817 | -1.42 | 0.03 |
| C1orf186 | ENSG00000263961 | -1.55 | 0.03 |
| C1orf210 | ENSG00000253313 | -2.83 | 0.00 |
| C1QTNF6  | ENSG00000133466 | -1.49 | 0.03 |
| C1RL-AS1 | ENSG00000205885 | -2.11 | 0.03 |
| C21orf58 | ENSG00000160298 | -2.07 | 0.00 |
| C2CD5    | ENSG00000111731 | -1.66 | 0.03 |
| C2orf54  | ENSG00000172478 | -6.73 | 0.00 |
| C3orf70  | ENSG00000187068 | -1.64 | 0.05 |
| C4BPA    | ENSG00000123838 | -1.27 | 0.03 |
| C8orf31  | ENSG00000177335 | 1.74  | 0.03 |
| C9       | ENSG00000113600 | -1.36 | 0.05 |
| C9orf40  | ENSG00000135045 | -1.37 | 0.05 |
| CA12     | ENSG00000074410 | 4.32  | 0.01 |
| CA14     | ENSG00000118298 | -2.53 | 0.00 |
| CABIN1   | ENSG00000099991 | -1.37 | 0.01 |
| CABLES2  | ENSG00000149679 | -1.85 | 0.00 |
| CACNA2D4 | ENSG00000151062 | 1.59  | 0.01 |
| CADM1    | ENSG00000182985 | -1.67 | 0.01 |
| CADPS2   | ENSG00000081803 | -1.45 | 0.02 |
| CAP1     | ENSG00000131236 | 1.33  | 0.01 |
| CAPN2    | ENSG00000162909 | 1.66  | 0.00 |
| CARD19   | ENSG00000165233 | 1.91  | 0.02 |
| CASC19   | ENSG00000254166 | 1.99  | 0.03 |
| CBLC     | ENSG00000142273 | -2.51 | 0.03 |
| CBR1     | ENSG00000159228 | 1.79  | 0.01 |
| CBX2     | ENSG00000173894 | -1.39 | 0.02 |
| CBX5     | ENSG00000094916 | -1.57 | 0.02 |
| CCDC15   | ENSG00000149548 | -1.93 | 0.03 |

|            |                 |       |      |
|------------|-----------------|-------|------|
| CCDC163    | ENSG00000280670 | -2.30 | 0.00 |
| CCDC170    | ENSG00000120262 | -2.25 | 0.02 |
| CCDC34     | ENSG00000109881 | -1.39 | 0.02 |
| CCDC84     | ENSG00000186166 | 1.79  | 0.00 |
| CCL14      | ENSG00000276409 | 1.46  | 0.01 |
| CCNA2      | ENSG00000145386 | -1.51 | 0.01 |
| CCNB1      | ENSG00000134057 | -1.39 | 0.03 |
| CCNB2      | ENSG00000157456 | -1.68 | 0.00 |
| CCNG2      | ENSG00000138764 | -1.79 | 0.05 |
| CCNH       | ENSG00000134480 | 1.42  | 0.01 |
| CCT2       | ENSG00000166226 | 1.34  | 0.01 |
| CCT5       | ENSG00000150753 | 1.38  | 0.02 |
| CCT6A      | ENSG00000146731 | 1.28  | 0.03 |
| CCT8       | ENSG00000156261 | 1.3   | 0.05 |
| CD4        | ENSG00000010610 | -1.88 | 0.00 |
| CD58       | ENSG00000116815 | 1.44  | 0.02 |
| CD83       | ENSG00000112149 | -1.82 | 0.00 |
| CDC123     | ENSG00000151465 | 1.39  | 0.02 |
| CDC25C     | ENSG00000158402 | -1.79 | 0.00 |
| CDC42BPG   | ENSG00000171219 | -1.58 | 0.01 |
| CDC42EP2   | ENSG00000149798 | 1.86  | 0.01 |
| CDC42EP4   | ENSG00000179604 | -2.38 | 0.00 |
| CDCA2      | ENSG00000184661 | -1.57 | 0.01 |
| CDCA3      | ENSG00000111665 | -1.39 | 0.02 |
| CDCA7      | ENSG00000144354 | -1.66 | 0.05 |
| CDCA8      | ENSG00000134690 | -1.53 | 0.01 |
| CDH1       | ENSG00000039068 | -1.57 | 0.02 |
| CDKN1A     | ENSG00000124762 | 1.53  | 0.03 |
| CDKN2AIPNL | ENSG00000237190 | -1.40 | 0.05 |
| CDKN2B     | ENSG00000147883 | 4.36  | 0.00 |
| CDKN2C     | ENSG00000123080 | -1.80 | 0.00 |
| CDKN3      | ENSG00000100526 | -1.65 | 0.00 |
| CDO1       | ENSG00000129596 | -1.88 | 0.02 |
| CDR2       | ENSG00000140743 | 1.29  | 0.03 |
| CEBPA      | ENSG00000245848 | -2.28 | 0.00 |
| CEBPA-AS1  | ENSG00000267296 | -1.58 | 0.03 |
| CELSR2     | ENSG00000143126 | -1.73 | 0.02 |
| CENPF      | ENSG00000117724 | -2.00 | 0.02 |
| CENPI      | ENSG00000102384 | -2.20 | 0.02 |
| CENPL      | ENSG00000120334 | -1.68 | 0.05 |
| CENPN      | ENSG00000166451 | -1.88 | 0.01 |
| CENPU      | ENSG00000151725 | -1.41 | 0.03 |
| CEP152     | ENSG00000103995 | -1.92 | 0.03 |
| CEP192     | ENSG00000101639 | -1.68 | 0.03 |
| CEP295     | ENSG00000166004 | -2.03 | 0.02 |
| CEP78      | ENSG00000148019 | -1.42 | 0.03 |

|            |                 |       |      |
|------------|-----------------|-------|------|
| CES1       | ENSG00000198848 | 1.66  | 0.00 |
| CFAP100    | ENSG00000163885 | 5.87  | 0.04 |
| CGNL1      | ENSG00000128849 | -2.06 | 0.00 |
| CHMP1B     | ENSG00000255112 | 1.26  | 0.03 |
| CHMP5      | ENSG00000086065 | 1.34  | 0.03 |
| CHORDC1    | ENSG00000110172 | 1.63  | 0.03 |
| CHPF2      | ENSG00000033100 | 1.51  | 0.00 |
| CHRD       | ENSG00000090539 | 1.37  | 0.04 |
| CHST3      | ENSG00000122863 | -1.71 | 0.00 |
| CIC        | ENSG00000079432 | -1.32 | 0.04 |
| CIT        | ENSG00000122966 | -1.85 | 0.00 |
| CKAP2L     | ENSG00000169607 | -1.61 | 0.03 |
| CLDN14     | ENSG00000159261 | -1.79 | 0.03 |
| CLDN19     | ENSG00000164007 | -2.89 | 0.01 |
| CLIC3      | ENSG00000169583 | -3.48 | 0.03 |
| CLIP4      | ENSG00000115295 | 46.19 | 0.00 |
| CLMN       | ENSG00000165959 | -1.39 | 0.04 |
| CNKS3      | ENSG00000153721 | -1.38 | 0.01 |
| CNTNAP3P2  | ENSG00000276386 | 2.47  | 0.02 |
| COG2       | ENSG00000135775 | -1.32 | 0.04 |
| COL16A1    | ENSG00000084636 | -1.31 | 0.03 |
| COL2A1     | ENSG00000139219 | -3.03 | 0.00 |
| COL4A6     | ENSG00000197565 | -1.49 | 0.01 |
| COMMD7     | ENSG00000149600 | -1.55 | 0.02 |
| COQ5       | ENSG00000110871 | -1.73 | 0.01 |
| COQ7       | ENSG00000167186 | -2.08 | 0.01 |
| CORO2A     | ENSG00000106789 | -1.39 | 0.01 |
| CORO2B     | ENSG00000103647 | 3.46  | 0.00 |
| CPB2       | ENSG00000080618 | -1.37 | 0.03 |
| CPLX1      | ENSG00000168993 | 2.86  | 0.00 |
| CPLX2      | ENSG00000145920 | 6.54  | 0.00 |
| CPS1       | ENSG00000021826 | -1.73 | 0.01 |
| CPT1A      | ENSG00000110090 | 1.97  | 0.00 |
| CREB3L4    | ENSG00000143578 | -1.96 | 0.00 |
| CRIP3      | ENSG00000146215 | -1.57 | 0.05 |
| CRTC3      | ENSG00000140577 | -1.91 | 0.04 |
| CRYBG1     | ENSG00000112297 | -1.42 | 0.03 |
| CSGALNACT2 | ENSG00000169826 | 1.79  | 0.04 |
| CTDP1      | ENSG00000060069 | 1.35  | 0.04 |
| CTDSP2     | ENSG00000175215 | -1.36 | 0.01 |
| CTPS1      | ENSG00000171793 | 1.32  | 0.03 |
| CTSL       | ENSG00000135047 | 1.61  | 0.01 |
| CTSV       | ENSG00000136943 | -1.93 | 0.00 |
| CTTN       | ENSG00000085733 | 1.38  | 0.03 |
| CXCL8      | ENSG00000169429 | 2.54  | 0.01 |
| CXorf40B   | ENSG00000197021 | 1.58  | 0.02 |

|          |                 |       |      |
|----------|-----------------|-------|------|
| CXXC5    | ENSG00000171604 | -2.19 | 0.05 |
| CYB561   | ENSG00000008283 | -2.10 | 0.01 |
| CYCSP6   | ENSG00000214429 | 1.48  | 0.04 |
| CYLD     | ENSG00000083799 | -1.65 | 0.05 |
| CYP20A1  | ENSG00000119004 | -1.60 | 0.02 |
| CYP21A1P | ENSG00000204338 | 2.07  | 0.02 |
| CYP24A1  | ENSG00000019186 | 2.65  | 0.00 |
| CYP2S1   | ENSG00000167600 | 2.12  | 0.03 |
| CYP2U1   | ENSG00000155016 | -1.65 | 0.01 |
| CYP2W1   | ENSG00000073067 | -1.53 | 0.02 |
| CYP4F11  | ENSG00000171903 | 2.61  | 0.00 |
| CYP8B1   | ENSG00000180432 | -1.69 | 0.02 |
| CYR61    | ENSG00000142871 | 2.55  | 0.00 |
| CYTOR    | ENSG00000222041 | 1.69  | 0.01 |
| DAPK1    | ENSG00000196730 | -1.49 | 0.01 |
| DBP      | ENSG00000105516 | -2.53 | 0.01 |
| DCAF13   | ENSG00000164934 | 1.46  | 0.01 |
| DCAF8    | ENSG00000132716 | 1.31  | 0.03 |
| DCBLD1   | ENSG00000164465 | 1.37  | 0.00 |
| DCBLD2   | ENSG00000057019 | 1.46  | 0.05 |
| DCLRE1A  | ENSG00000198924 | -1.62 | 0.02 |
| DCLRE1B  | ENSG00000118655 | -1.39 | 0.03 |
| DCP1B    | ENSG00000151065 | -1.60 | 0.00 |
| DDX27    | ENSG00000124228 | 1.32  | 0.02 |
| DDX49    | ENSG00000105671 | 1.44  | 0.04 |
| DESI1    | ENSG00000100418 | 1.34  | 0.02 |
| DFFA     | ENSG00000160049 | 1.34  | 0.02 |
| DGKK     | ENSG00000274588 | -2.62 | 0.00 |
| DHRS2    | ENSG00000100867 | -1.71 | 0.04 |
| DHTKD1   | ENSG00000181192 | -1.45 | 0.05 |
| DHX34    | ENSG00000134815 | 1.38  | 0.02 |
| DHX37    | ENSG00000150990 | 1.39  | 0.03 |
| DLGAP5   | ENSG00000126787 | -1.58 | 0.01 |
| DLX4     | ENSG00000108813 | -2.33 | 0.03 |
| DLX6-AS1 | ENSG00000231764 | -1.80 | 0.02 |
| DNAJB1   | ENSG00000132002 | 1.47  | 0.03 |
| DNAJC11  | ENSG00000007923 | 1.24  | 0.02 |
| DND1     | ENSG00000256453 | 1.69  | 0.00 |
| DNLZ     | ENSG00000213221 | 1.52  | 0.04 |
| DNMT3B   | ENSG00000088305 | -1.80 | 0.01 |
| DNMT3L   | ENSG00000142182 | 27.36 | 0.01 |
| DOCK6    | ENSG00000130158 | 1.44  | 0.02 |
| DPEP1    | ENSG00000015413 | -1.97 | 0.01 |
| DSTYK    | ENSG00000133059 | -1.83 | 0.02 |
| DUSP1    | ENSG00000120129 | 1.75  | 0.01 |
| DUSP10   | ENSG00000143507 | -1.74 | 0.03 |



|          |                 |       |      |
|----------|-----------------|-------|------|
| DUSP13   | ENSG00000079393 | 5.36  | 0.00 |
| DUSP5    | ENSG00000138166 | 4.92  | 0.00 |
| DUSP6    | ENSG00000139318 | 1.39  | 0.05 |
| DUSP9    | ENSG00000130829 | -1.42 | 0.04 |
| DYSF     | ENSG00000135636 | -4.50 | 0.01 |
| E2F2     | ENSG00000007968 | -1.77 | 0.01 |
| E2F7     | ENSG00000165891 | -1.60 | 0.02 |
| E2F8     | ENSG00000129173 | -1.65 | 0.03 |
| EBNA1BP2 | ENSG00000117395 | 1.54  | 0.01 |
| EGFR-AS1 | ENSG00000224057 | 1.65  | 0.03 |
| EGR1     | ENSG00000120738 | 3.35  | 0.00 |
| EHD4     | ENSG00000103966 | 1.38  | 0.03 |
| EID3     | ENSG00000255150 | 11.47 | 0.00 |
| EIF1AD   | ENSG00000175376 | 1.36  | 0.02 |
| EIF2S1   | ENSG00000134001 | 1.32  | 0.03 |
| EIF3B    | ENSG00000106263 | 1.3   | 0.03 |
| EIF4EBP2 | ENSG00000148730 | -1.59 | 0.00 |
| EIF5A    | ENSG00000132507 | 1.53  | 0.04 |
| ELF3     | ENSG00000163435 | -1.51 | 0.02 |
| ELMO3    | ENSG00000102890 | 1.83  | 0.01 |
| EMC7     | ENSG00000134153 | 1.39  | 0.03 |
| ENO3     | ENSG00000108515 | -1.73 | 0.01 |
| ENPP2    | ENSG00000136960 | -5.86 | 0.00 |
| ENTPD2   | ENSG00000054179 | 1.32  | 0.03 |
| EPHB4    | ENSG00000196411 | -1.54 | 0.00 |
| EPHX1    | ENSG00000143819 | 2.61  | 0.00 |
| EPHX2    | ENSG00000120915 | -1.99 | 0.00 |
| EPPK1    | ENSG00000261150 | -1.85 | 0.01 |
| EPS8L3   | ENSG00000198758 | 1.62  | 0.00 |
| ERAP2    | ENSG00000164308 | -1.45 | 0.04 |
| ERBB2    | ENSG00000141736 | -2.14 | 0.00 |
| ERCC1    | ENSG00000012061 | 1.57  | 0.01 |
| ERN1     | ENSG00000178607 | 1.64  | 0.03 |
| ERP27    | ENSG00000139055 | -3.23 | 0.00 |
| ERRFI1   | ENSG00000116285 | 1.65  | 0.01 |
| ESPL1    | ENSG00000135476 | -1.73 | 0.01 |
| ESPN     | ENSG00000187017 | -1.73 | 0.04 |
| ETNK2    | ENSG00000143845 | -2.43 | 0.00 |
| ETS2     | ENSG00000157557 | 1.32  | 0.01 |
| ETV4     | ENSG00000175832 | -1.39 | 0.02 |
| EVC      | ENSG00000072840 | -1.85 | 0.00 |
| EXO5     | ENSG00000164002 | -2.27 | 0.03 |
| EZH2     | ENSG00000106462 | -1.39 | 0.05 |
| F2RL1    | ENSG00000164251 | 2.24  | 0.00 |
| F3       | ENSG00000117525 | 1.69  | 0.03 |
| FABP5    | ENSG00000164687 | 1.57  | 0.00 |

|            |                 |       |      |
|------------|-----------------|-------|------|
| FADS1      | ENSG00000149485 | -1.45 | 0.00 |
| FAH        | ENSG00000103876 | 1.61  | 0.02 |
| FAM102A    | ENSG00000167106 | -1.73 | 0.01 |
| FAM102B    | ENSG00000162636 | -3.20 | 0.01 |
| FAM111A    | ENSG00000166801 | -1.84 | 0.00 |
| FAM111B    | ENSG00000189057 | -1.42 | 0.02 |
| FAM117A    | ENSG00000121104 | -1.53 | 0.01 |
| FAM155B    | ENSG00000130054 | 1.38  | 0.02 |
| FAM168A    | ENSG00000054965 | -1.42 | 0.03 |
| FAM171A2   | ENSG00000161682 | -2.00 | 0.01 |
| FAM174A    | ENSG00000174132 | 1.6   | 0.01 |
| FAM189B    | ENSG00000160767 | -1.36 | 0.03 |
| FAM20C     | ENSG00000177706 | -1.48 | 0.04 |
| FAM222A    | ENSG00000139438 | -2.25 | 0.00 |
| FAM83D     | ENSG00000101447 | -1.36 | 0.03 |
| FAM83H     | ENSG00000180921 | 1.78  | 0.05 |
| FANCC      | ENSG00000158169 | -1.31 | 0.05 |
| FANCG      | ENSG00000221829 | -1.40 | 0.04 |
| FAXDC2     | ENSG00000170271 | -2.13 | 0.00 |
| FBXL16     | ENSG00000127585 | -1.58 | 0.03 |
| FBXO43     | ENSG00000156509 | -1.85 | 0.04 |
| FECH       | ENSG00000066926 | 1.45  | 0.04 |
| FEN1       | ENSG00000168496 | -1.58 | 0.02 |
| FGD4       | ENSG00000139132 | -2.66 | 0.02 |
| FGFR2      | ENSG00000066468 | -6.54 | 0.00 |
| FGFR3      | ENSG00000068078 | -1.45 | 0.02 |
| FHL2       | ENSG00000115641 | 1.51  | 0.05 |
| FHL3       | ENSG00000183386 | 1.55  | 0.05 |
| FKBP4      | ENSG00000004478 | 1.54  | 0.00 |
| FLNA       | ENSG00000196924 | 1.49  | 0.03 |
| FLOT1      | ENSG00000137312 | -1.46 | 0.03 |
| FLVCR1     | ENSG00000162769 | -2.17 | 0.03 |
| FLVCR2     | ENSG00000119686 | -1.29 | 0.03 |
| FMO5       | ENSG00000131781 | -1.83 | 0.01 |
| FOSL1      | ENSG00000175592 | 2.23  | 0.01 |
| FOXO4      | ENSG00000184481 | -1.82 | 0.01 |
| FOXP4      | ENSG00000137166 | -1.75 | 0.00 |
| FOXQ1      | ENSG00000164379 | 1.41  | 0.02 |
| FP236383.1 | ENSG00000280441 | -2.43 | 0.02 |
| FREM1      | ENSG00000164946 | -1.54 | 0.01 |
| FST        | ENSG00000134363 | 1.7   | 0.00 |
| FTH1P11    | ENSG00000237264 | 2.19  | 0.02 |
| FTH1P2     | ENSG00000234975 | 1.78  | 0.02 |
| FTL        | ENSG00000087086 | 2.32  | 0.00 |
| FTLP3      | ENSG00000226608 | 2.13  | 0.00 |
| FUT7       | ENSG00000180549 | 1.55  | 0.02 |

|         |                 |       |      |
|---------|-----------------|-------|------|
| FXR2    | ENSG00000129245 | 1.42  | 0.03 |
| FYN     | ENSG0000010810  | 1.93  | 0.00 |
| FZD1    | ENSG00000157240 | -2.55 | 0.00 |
| G6PD    | ENSG00000160211 | 1.62  | 0.02 |
| GABRE   | ENSG00000102287 | 2.81  | 0.00 |
| GAL3ST1 | ENSG00000128242 | -1.87 | 0.02 |
| GALNT1  | ENSG00000141429 | 1.62  | 0.02 |
| GALNT11 | ENSG00000178234 | -1.44 | 0.01 |
| GALNT6  | ENSG00000139629 | -2.23 | 0.02 |
| GANC    | ENSG00000214013 | -1.40 | 0.01 |
| GAREM2  | ENSG00000157833 | -1.67 | 0.05 |
| GART    | ENSG00000159131 | 1.29  | 0.03 |
| GAS2L3  | ENSG00000139354 | -1.77 | 0.04 |
| GAS7    | ENSG00000007237 | -2.51 | 0.00 |
| GATA4   | ENSG00000136574 | -2.04 | 0.02 |
| GATA6   | ENSG00000141448 | -2.36 | 0.00 |
| GBE1    | ENSG00000114480 | 1.73  | 0.01 |
| GCKR    | ENSG00000084734 | 2.37  | 0.00 |
| GCLC    | ENSG00000001084 | 4.44  | 0.00 |
| GCLM    | ENSG00000023909 | 4.95  | 0.00 |
| GDF15   | ENSG00000130513 | 2.23  | 0.00 |
| GDF7    | ENSG00000143869 | -2.20 | 0.00 |
| GDPD5   | ENSG00000158555 | -2.60 | 0.00 |
| GGACT   | ENSG00000134864 | -2.85 | 0.02 |
| GGH     | ENSG00000137563 | -1.51 | 0.01 |
| GGT5    | ENSG00000099998 | 2.51  | 0.00 |
| GHITM   | ENSG00000165678 | 1.43  | 0.00 |
| GIGYF2  | ENSG00000204120 | -1.29 | 0.04 |
| GLA     | ENSG00000102393 | 1.76  | 0.00 |
| GLDC    | ENSG00000178445 | -1.30 | 0.03 |
| GLIPR1  | ENSG00000139278 | 1.89  | 0.00 |
| GLIS2   | ENSG00000126603 | -6.45 | 0.01 |
| GLRX    | ENSG00000173221 | 1.84  | 0.00 |
| GLT8D1  | ENSG00000016864 | -1.30 | 0.05 |
| GLUD1   | ENSG00000148672 | -1.31 | 0.01 |
| GLUL    | ENSG00000135821 | -1.42 | 0.01 |
| GM2A    | ENSG00000196743 | -1.39 | 0.04 |
| GMNN    | ENSG00000112312 | -1.33 | 0.03 |
| GNA11   | ENSG00000088256 | -1.65 | 0.02 |
| GNG7    | ENSG00000176533 | -2.00 | 0.00 |
| GNMT    | ENSG00000124713 | -2.99 | 0.04 |
| GNPDA1  | ENSG00000113552 | 1.58  | 0.01 |
| GOLT1A  | ENSG00000174567 | 1.92  | 0.01 |
| GOT1    | ENSG00000120053 | 1.28  | 0.04 |
| GOT2    | ENSG00000125166 | 1.33  | 0.01 |
| GPAT3   | ENSG00000138678 | 4.49  | 0.00 |

|            |                 |       |      |
|------------|-----------------|-------|------|
| GPATCH1    | ENSG00000076650 | -1.45 | 0.03 |
| GPD1       | ENSG00000167588 | 1.99  | 0.00 |
| GPI        | ENSG00000105220 | 1.49  | 0.01 |
| GPNMB      | ENSG00000136235 | 2.23  | 0.03 |
| GPX2       | ENSG00000176153 | 2.79  | 0.01 |
| GRB10      | ENSG00000106070 | 1.37  | 0.03 |
| GRB7       | ENSG00000141738 | -1.59 | 0.02 |
| GREB1      | ENSG00000196208 | -1.60 | 0.01 |
| GRTP1      | ENSG00000139835 | -1.36 | 0.03 |
| GSR        | ENSG00000104687 | 2.33  | 0.00 |
| GSTM4      | ENSG00000168765 | -1.46 | 0.04 |
| GSTO1      | ENSG00000148834 | 1.42  | 0.03 |
| GTPBP4     | ENSG00000107937 | 1.42  | 0.00 |
| H1F0       | ENSG00000189060 | -1.52 | 0.01 |
| H1FX       | ENSG00000184897 | -1.91 | 0.00 |
| H2AFV      | ENSG00000105968 | -1.53 | 0.01 |
| H2AFX      | ENSG00000188486 | -1.48 | 0.03 |
| H2AFY2     | ENSG00000099284 | -1.45 | 0.01 |
| H6PD       | ENSG00000049239 | -1.77 | 0.05 |
| HACL1      | ENSG00000131373 | 1.35  | 0.02 |
| HADH       | ENSG00000138796 | -1.36 | 0.04 |
| HAGLR      | ENSG00000224189 | -1.41 | 0.01 |
| HAL        | ENSG00000084110 | -1.67 | 0.01 |
| HBEGF      | ENSG00000113070 | 1.95  | 0.01 |
| HCST       | ENSG00000126264 | 27.63 | 0.01 |
| HDAC5      | ENSG00000108840 | -1.99 | 0.00 |
| HDDC2      | ENSG00000111906 | 1.48  | 0.04 |
| HELZ2      | ENSG00000130589 | -1.60 | 0.02 |
| HEPACAM    | ENSG00000165478 | -2.35 | 0.01 |
| HFE        | ENSG00000010704 | -2.06 | 0.03 |
| HGD        | ENSG00000113924 | 1.47  | 0.00 |
| HGFAC      | ENSG00000109758 | 1.44  | 0.02 |
| HGS        | ENSG00000185359 | 1.38  | 0.04 |
| HHAT       | ENSG00000054392 | -1.39 | 0.05 |
| HHIPL2     | ENSG00000143512 | 1.98  | 0.01 |
| HIC1       | ENSG00000177374 | -9.65 | 0.02 |
| HKDC1      | ENSG00000156510 | 2.28  | 0.00 |
| HLF        | ENSG00000108924 | -1.48 | 0.03 |
| HMGA1      | ENSG00000137309 | 1.58  | 0.00 |
| HMGB3      | ENSG00000029993 | -1.59 | 0.00 |
| HMGCS2     | ENSG00000134240 | -4.03 | 0.02 |
| HMMR       | ENSG00000072571 | -1.93 | 0.03 |
| HMSD       | ENSG00000221887 | 2.31  | 0.03 |
| HNRNPA1P10 | ENSG00000214223 | -1.23 | 0.05 |
| HOXA3      | ENSG00000105997 | -1.60 | 0.02 |
| HOXA-AS2   | ENSG00000253552 | -2.07 | 0.03 |

|          |                 |       |      |
|----------|-----------------|-------|------|
| HOXD1    | ENSG00000128645 | -3.41 | 0.00 |
| HPCAL1   | ENSG00000115756 | 1.6   | 0.01 |
| HPX      | ENSG00000110169 | -2.27 | 0.01 |
| HSP90AA1 | ENSG00000080824 | 1.57  | 0.03 |
| HSP90AB1 | ENSG00000096384 | 1.19  | 0.04 |
| HSPA4    | ENSG00000170606 | 1.29  | 0.02 |
| HSPA5    | ENSG00000044574 | 1.21  | 0.05 |
| HSPA8    | ENSG00000109971 | 1.55  | 0.01 |
| HSPD1P1  | ENSG00000213430 | 2.09  | 0.05 |
| HSPH1    | ENSG00000120694 | 1.64  | 0.01 |
| HUNK     | ENSG00000142149 | -1.97 | 0.00 |
| IBA57    | ENSG00000181873 | -1.47 | 0.01 |
| ICAM1    | ENSG00000090339 | 1.6   | 0.02 |
| ICAM4    | ENSG00000105371 | -1.92 | 0.04 |
| IDNK     | ENSG00000148057 | -1.87 | 0.05 |
| IER3     | ENSG00000137331 | 2.41  | 0.00 |
| IFIT1    | ENSG00000185745 | -2.66 | 0.03 |
| IFRD1    | ENSG00000006652 | 1.56  | 0.01 |
| IFT46    | ENSG00000118096 | -2.30 | 0.01 |
| IGDCC3   | ENSG00000174498 | -1.74 | 0.00 |
| IGFBP3   | ENSG00000146674 | 1.97  | 0.04 |
| IGFBP4   | ENSG00000141753 | 1.63  | 0.01 |
| IGHMBP2  | ENSG00000132740 | 1.53  | 0.00 |
| IGSF1    | ENSG00000147255 | -1.36 | 0.03 |
| IGSF23   | ENSG00000216588 | -2.28 | 0.01 |
| IKBK     | ENSG00000269335 | 3.44  | 0.00 |
| IL11     | ENSG00000095752 | 3.37  | 0.00 |
| IL17RC   | ENSG00000163702 | -1.52 | 0.03 |
| IL22RA1  | ENSG00000142677 | -1.57 | 0.01 |
| IL27RA   | ENSG00000104998 | 1.29  | 0.05 |
| IL6R     | ENSG00000160712 | 2.71  | 0.01 |
| IMP4     | ENSG00000136718 | 1.62  | 0.02 |
| IMPDH1   | ENSG00000106348 | 1.65  | 0.01 |
| INHA     | ENSG00000123999 | -1.79 | 0.01 |
| INHBC    | ENSG00000175189 | -1.66 | 0.04 |
| INPP5J   | ENSG00000185133 | -3.66 | 0.01 |
| IPPK     | ENSG00000127080 | 1.53  | 0.04 |
| IQGAP3   | ENSG00000183856 | -2.00 | 0.00 |
| IRF2     | ENSG00000168310 | -1.33 | 0.03 |
| IRX3     | ENSG00000177508 | -1.73 | 0.01 |
| ISG20    | ENSG00000172183 | 2     | 0.01 |
| ISG20L2  | ENSG00000143319 | 1.53  | 0.01 |
| ISL2     | ENSG00000159556 | 1.61  | 0.02 |
| ITGA1    | ENSG00000213949 | 2.04  | 0.03 |
| ITGB5    | ENSG00000082781 | 1.43  | 0.03 |
| ITIH1    | ENSG00000055957 | -1.71 | 0.02 |

|            |                 |       |      |
|------------|-----------------|-------|------|
| ITIH5      | ENSG00000123243 | -1.48 | 0.02 |
| JAG1       | ENSG00000101384 | 3.51  | 0.00 |
| JHDM1D-AS1 | ENSG00000260231 | 1.37  | 0.04 |
| JMJD6      | ENSG00000070495 | 1.45  | 0.04 |
| JUN        | ENSG00000177606 | 1.54  | 0.01 |
| JUNB       | ENSG00000171223 | 1.59  | 0.03 |
| KALRN      | ENSG00000160145 | 1.4   | 0.04 |
| KANK4      | ENSG00000132854 | -2.81 | 0.00 |
| KAT2B      | ENSG00000114166 | -1.84 | 0.03 |
| KAZALD1    | ENSG00000107821 | -1.77 | 0.00 |
| KCMF1      | ENSG00000176407 | 1.48  | 0.03 |
| KCNJ11     | ENSG00000187486 | -2.08 | 0.03 |
| KCNK13     | ENSG00000152315 | 3.34  | 0.02 |
| KCTD1      | ENSG00000134504 | -1.91 | 0.01 |
| KDM4D      | ENSG00000186280 | -1.77 | 0.03 |
| KIAA0922   | ENSG00000121210 | 1.4   | 0.02 |
| KIAA1161   | ENSG00000164976 | -1.46 | 0.01 |
| KIAA1462   | ENSG00000165757 | 5.27  | 0.03 |
| KIAA1522   | ENSG00000162522 | -1.31 | 0.02 |
| KIF11      | ENSG00000138160 | -1.69 | 0.02 |
| KIF12      | ENSG00000136883 | -2.46 | 0.01 |
| KIF15      | ENSG00000163808 | -1.75 | 0.01 |
| KIF18A     | ENSG00000121621 | -1.66 | 0.01 |
| KIF20A     | ENSG00000112984 | -1.85 | 0.01 |
| KIF22      | ENSG00000079616 | -1.49 | 0.01 |
| KIF23      | ENSG00000137807 | -1.34 | 0.02 |
| KIF2C      | ENSG00000142945 | -1.53 | 0.00 |
| KIF4A      | ENSG00000090889 | -1.45 | 0.01 |
| KIFC1      | ENSG00000237649 | -1.42 | 0.01 |
| KIFC3      | ENSG00000140859 | 1.5   | 0.04 |
| KLB        | ENSG00000134962 | -1.95 | 0.00 |
| KLC4       | ENSG00000137171 | -1.38 | 0.04 |
| KLF10      | ENSG00000155090 | 1.46  | 0.05 |
| KLF11      | ENSG00000172059 | -2.27 | 0.00 |
| KLF5       | ENSG00000102554 | 1.85  | 0.05 |
| KLHDC2     | ENSG00000165516 | -1.42 | 0.01 |
| KLHDC9     | ENSG00000162755 | -4.44 | 0.02 |
| KLHL14     | ENSG00000197705 | -1.99 | 0.00 |
| KLHL18     | ENSG00000114648 | 1.61  | 0.01 |
| KLHL21     | ENSG00000162413 | 1.47  | 0.01 |
| KLHL5      | ENSG00000109790 | 1.42  | 0.02 |
| KNG1       | ENSG00000113889 | -1.82 | 0.02 |
| KYNU       | ENSG00000115919 | 1.58  | 0.00 |
| LAMP1      | ENSG00000185896 | 1.42  | 0.03 |
| LAPTM4B    | ENSG00000104341 | 1.28  | 0.05 |
| LCN15      | ENSG00000177984 | -2.55 | 0.01 |

|            |                 |       |      |
|------------|-----------------|-------|------|
| LDHD       | ENSG00000166816 | -2.03 | 0.00 |
| LGALS3     | ENSG00000131981 | 1.85  | 0.00 |
| LGALS8     | ENSG00000116977 | 1.31  | 0.05 |
| LGALS8-AS1 | ENSG00000223776 | 1.72  | 0.05 |
| LIF        | ENSG00000128342 | 2.72  | 0.04 |
| LIG3       | ENSG00000005156 | 1.27  | 0.04 |
| LIMD2      | ENSG00000136490 | 1.47  | 0.04 |
| LINC00261  | ENSG00000259974 | -1.47 | 0.04 |
| LINC00346  | ENSG00000255874 | 3.36  | 0.01 |
| LINC00638  | ENSG00000258701 | -2.39 | 0.04 |
| LINC00654  | ENSG00000205181 | -1.91 | 0.02 |
| LINC00694  | ENSG00000225873 | -7.26 | 0.00 |
| LINC00870  | ENSG00000243083 | -2.36 | 0.01 |
| LINC00941  | ENSG00000235884 | 5.33  | 0.00 |
| LINC00973  | ENSG00000240476 | 4.04  | 0.05 |
| LINC01124  | ENSG00000222033 | -1.78 | 0.00 |
| LINC01564  | ENSG00000235899 | 13.07 | 0.00 |
| LINC01770  | ENSG00000225285 | -1.85 | 0.00 |
| LINC02413  | ENSG00000257345 | -2.71 | 0.01 |
| LINGO4     | ENSG00000213171 | -2.14 | 0.02 |
| LIVAR      | ENSG00000266304 | 2.67  | 0.00 |
| LMTK3      | ENSG00000142235 | -1.96 | 0.01 |
| LRCH1      | ENSG00000136141 | 1.47  | 0.01 |
| LRFN4      | ENSG00000173621 | 1.85  | 0.00 |
| LRP8       | ENSG00000157193 | 2.22  | 0.00 |
| LRRC1      | ENSG00000137269 | 1.29  | 0.03 |
| LRRC3      | ENSG00000160233 | -1.56 | 0.01 |
| LRRC37A4P  | ENSG00000214425 | -1.65 | 0.01 |
| LSM14B     | ENSG00000149657 | -1.35 | 0.03 |
| LUCAT1     | ENSG00000248323 | 32.09 | 0.00 |
| LURAP1L    | ENSG00000153714 | 1.69  | 0.01 |
| LYZ        | ENSG00000090382 | -1.33 | 0.04 |
| M6PR       | ENSG00000003056 | 1.86  | 0.03 |
| MAFA       | ENSG00000182759 | -6.54 | 0.04 |
| MAFF       | ENSG00000185022 | 1.38  | 0.02 |
| MAFK       | ENSG00000198517 | 1.44  | 0.01 |
| MAGED2     | ENSG00000102316 | -1.40 | 0.02 |
| MAMSTR     | ENSG00000176909 | -1.75 | 0.02 |
| MAP2K1     | ENSG00000169032 | 1.37  | 0.01 |
| MAP2K3     | ENSG00000034152 | 1.49  | 0.00 |
| MAP2K6     | ENSG00000108984 | -1.95 | 0.00 |
| MAP3K14    | ENSG00000006062 | 1.71  | 0.01 |
| MAP3K3     | ENSG00000198909 | -1.39 | 0.03 |
| MAP3K4     | ENSG00000085511 | -1.47 | 0.02 |
| MAP4K4     | ENSG00000071054 | -1.54 | 0.00 |
| MAP7D2     | ENSG00000184368 | -1.36 | 0.04 |

|             |                 |       |      |
|-------------|-----------------|-------|------|
| MAPK13      | ENSG00000156711 | 1.54  | 0.00 |
| MARS2       | ENSG00000247626 | 1.41  | 0.04 |
| MAST4       | ENSG00000069020 | -2.01 | 0.00 |
| MASTL       | ENSG00000120539 | -1.42 | 0.04 |
| MATN3       | ENSG00000132031 | -1.66 | 0.00 |
| MBL2        | ENSG00000165471 | -2.19 | 0.00 |
| MCAM        | ENSG00000076706 | -1.39 | 0.02 |
| ME2         | ENSG00000082212 | 1.44  | 0.03 |
| MED10       | ENSG00000133398 | 1.44  | 0.05 |
| MEIKIN      | ENSG00000239642 | -1.79 | 0.04 |
| METTL7A     | ENSG00000185432 | -2.17 | 0.01 |
| METTL7B     | ENSG00000170439 | 2.01  | 0.00 |
| MEX3A       | ENSG00000254726 | -1.45 | 0.05 |
| MEX3B       | ENSG00000183496 | -1.99 | 0.04 |
| MFAP2       | ENSG00000117122 | -2.83 | 0.02 |
| MGAT4B      | ENSG00000161013 | 1.36  | 0.04 |
| MGST1       | ENSG00000008394 | 2.23  | 0.00 |
| MICALL2     | ENSG00000164877 | 1.61  | 0.01 |
| MINDY1      | ENSG00000143409 | -1.49 | 0.03 |
| MIR22HG     | ENSG00000186594 | 2.54  | 0.05 |
| MIR29A      | ENSG00000284032 | 2.83  | 0.01 |
| MIR4435-2HG | ENSG00000172965 | 2.03  | 0.01 |
| MIS18A      | ENSG00000159055 | -1.80 | 0.00 |
| MIS18BP1    | ENSG00000129534 | -1.83 | 0.05 |
| MKS1        | ENSG00000011143 | -1.40 | 0.02 |
| MLYCD       | ENSG00000103150 | 4.13  | 0.00 |
| MMP10       | ENSG00000166670 | 7.74  | 0.01 |
| MOB3A       | ENSG00000172081 | -1.39 | 0.02 |
| MORN4       | ENSG00000171160 | -1.54 | 0.02 |
| MOV10       | ENSG00000155363 | -1.35 | 0.03 |
| MPHOSPH9    | ENSG00000051825 | -1.51 | 0.04 |
| MPP7        | ENSG00000150054 | -1.93 | 0.01 |
| MPZL3       | ENSG00000160588 | 1.48  | 0.03 |
| MROH8       | ENSG00000101353 | -2.22 | 0.01 |
| MRPS11      | ENSG00000181991 | 1.51  | 0.05 |
| MRPS30      | ENSG00000112996 | 1.3   | 0.02 |
| MTCL1       | ENSG00000168502 | 1.81  | 0.01 |
| MTHFD1L     | ENSG00000120254 | 1.26  | 0.05 |
| MT-TT       | ENSG00000210195 | 1.48  | 0.02 |
| MUTYH       | ENSG00000132781 | -1.53 | 0.04 |
| MVB12B      | ENSG00000196814 | -1.55 | 0.00 |
| MX1         | ENSG00000157601 | -2.06 | 0.01 |
| MYBBP1A     | ENSG00000132382 | 1.57  | 0.00 |
| MYH10       | ENSG00000133026 | -1.45 | 0.04 |
| MYO10       | ENSG00000145555 | -1.73 | 0.00 |
| MYO15B      | ENSG00000266714 | 1.5   | 0.01 |



|          |                 |       |      |
|----------|-----------------|-------|------|
| MYO1G    | ENSG00000136286 | -3.84 | 0.00 |
| NAALAD2  | ENSG00000077616 | -1.82 | 0.02 |
| NAALADL1 | ENSG00000168060 | -1.56 | 0.04 |
| NAGA     | ENSG00000198951 | -1.48 | 0.03 |
| NATD1    | ENSG00000274180 | -1.69 | 0.01 |
| NCAPD2   | ENSG00000010292 | -1.54 | 0.00 |
| NCAPG    | ENSG00000109805 | -1.38 | 0.03 |
| NCAPH    | ENSG00000121152 | -1.37 | 0.01 |
| NCF2     | ENSG00000116701 | 13.38 | 0.00 |
| NECAB3   | ENSG00000125967 | 1.46  | 0.03 |
| NEDD4L   | ENSG00000049759 | -1.34 | 0.00 |
| NEK2     | ENSG00000117650 | -2.06 | 0.00 |
| NEURL1B  | ENSG00000214357 | -3.20 | 0.02 |
| NFATC2   | ENSG00000101096 | -1.71 | 0.01 |
| NFE2     | ENSG00000123405 | -4.38 | 0.03 |
| NFE2L3   | ENSG00000050344 | 1.33  | 0.04 |
| NIPA2    | ENSG00000140157 | 1.44  | 0.02 |
| NKD1     | ENSG00000140807 | -1.54 | 0.00 |
| NLGN2    | ENSG00000169992 | -1.61 | 0.04 |
| NLGN4Y   | ENSG00000165246 | -1.55 | 0.01 |
| NLN      | ENSG00000123213 | 1.66  | 0.01 |
| NOL6     | ENSG00000165271 | 1.55  | 0.01 |
| NOLC1    | ENSG00000166197 | 1.4   | 0.00 |
| NOMO1    | ENSG00000103512 | 1.22  | 0.05 |
| NOP14    | ENSG00000087269 | 1.36  | 0.05 |
| NOP16    | ENSG00000048162 | 1.66  | 0.01 |
| NOP2     | ENSG00000111641 | 1.58  | 0.00 |
| NOTCH1   | ENSG00000148400 | -2.85 | 0.04 |
| NPAS1    | ENSG00000130751 | 3.86  | 0.00 |
| NPLOC4   | ENSG00000182446 | 1.33  | 0.02 |
| NPNT     | ENSG00000168743 | -4.38 | 0.00 |
| NPTN     | ENSG00000156642 | 1.34  | 0.01 |
| NPTXR    | ENSG00000221890 | -1.73 | 0.02 |
| NQO1     | ENSG00000181019 | 3.12  | 0.00 |
| NR1D1    | ENSG00000126368 | 1.57  | 0.03 |
| NR1H4    | ENSG00000012504 | -1.62 | 0.02 |
| NR2C1    | ENSG00000120798 | -1.52 | 0.03 |
| NRP2     | ENSG00000118257 | -1.84 | 0.03 |
| NSMCE4A  | ENSG00000107672 | -1.33 | 0.03 |
| NTN4     | ENSG00000074527 | -1.60 | 0.05 |
| NUCKS1   | ENSG00000069275 | -1.55 | 0.03 |
| NUDC     | ENSG00000090273 | 1.45  | 0.03 |
| NUDT4P1  | ENSG00000177144 | -1.88 | 0.00 |
| NUDT4P2  | ENSG00000271121 | -1.77 | 0.01 |
| NUSAP1   | ENSG00000137804 | -1.68 | 0.01 |
| NYNRIN   | ENSG00000205978 | -4.38 | 0.00 |

|           |                 |       |      |
|-----------|-----------------|-------|------|
| ODC1      | ENSG00000115758 | 1.73  | 0.00 |
| OIT3      | ENSG00000138315 | -1.61 | 0.01 |
| OLAH      | ENSG00000152463 | 5.83  | 0.03 |
| OLFML1    | ENSG00000183801 | -4.29 | 0.00 |
| OPHN1     | ENSG00000079482 | -2.30 | 0.02 |
| ORC3      | ENSG00000135336 | -1.45 | 0.01 |
| OSBP2     | ENSG00000184792 | -1.87 | 0.02 |
| OSMR      | ENSG00000145623 | 1.75  | 0.00 |
| OTX1      | ENSG00000115507 | -1.77 | 0.01 |
| P2RY6     | ENSG00000171631 | 7.23  | 0.00 |
| P2RY8     | ENSG00000182162 | -1.53 | 0.03 |
| PAK1IP1   | ENSG00000111845 | 1.39  | 0.00 |
| PALLD     | ENSG00000129116 | 2.65  | 0.00 |
| PALMD     | ENSG00000099260 | -1.60 | 0.01 |
| PANK1     | ENSG00000152782 | -1.62 | 0.00 |
| PANX2     | ENSG00000073150 | 2.66  | 0.00 |
| PAPSS1    | ENSG00000138801 | -1.36 | 0.03 |
| PAQR5     | ENSG00000137819 | 4.91  | 0.00 |
| PAQR8     | ENSG00000170915 | -1.78 | 0.00 |
| PART1     | ENSG00000152931 | 1.4   | 0.04 |
| PBK       | ENSG00000168078 | -2.06 | 0.00 |
| PBLD      | ENSG00000108187 | -2.13 | 0.01 |
| PBX3      | ENSG00000167081 | -2.55 | 0.02 |
| PBXIP1    | ENSG00000163346 | -1.88 | 0.00 |
| PCOLCE    | ENSG00000106333 | -1.85 | 0.00 |
| PCSK4     | ENSG00000115257 | -1.75 | 0.03 |
| PCTP      | ENSG00000141179 | -1.27 | 0.03 |
| PCYT1A    | ENSG00000161217 | 1.54  | 0.03 |
| PCYT1B    | ENSG00000102230 | -1.78 | 0.01 |
| PDCD11    | ENSG00000148843 | 1.35  | 0.02 |
| PDCD4-AS1 | ENSG00000203497 | -2.07 | 0.01 |
| PDLIM5    | ENSG00000163110 | -1.93 | 0.00 |
| PDLIM7    | ENSG00000196923 | 1.59  | 0.04 |
| PDPK2P    | ENSG00000205918 | -1.59 | 0.04 |
| PDZK1     | ENSG00000174827 | -1.56 | 0.02 |
| PEG10     | ENSG00000242265 | -1.96 | 0.01 |
| PEG13     | ENSG00000282164 | -1.41 | 0.03 |
| PES1      | ENSG00000100029 | 1.48  | 0.02 |
| PEX13     | ENSG00000162928 | -1.73 | 0.01 |
| PFDN2     | ENSG00000143256 | 1.73  | 0.03 |
| PFKP      | ENSG00000067057 | 2.75  | 0.00 |
| PGC       | ENSG00000096088 | -1.62 | 0.04 |
| PGLYRP2   | ENSG00000161031 | -2.03 | 0.04 |
| PGM1      | ENSG00000079739 | -1.40 | 0.02 |
| PHF8      | ENSG00000172943 | -1.38 | 0.05 |
| PHGDH     | ENSG00000092621 | -1.58 | 0.02 |

|          |                 |       |      |
|----------|-----------------|-------|------|
| PHLDA1   | ENSG00000139289 | 1.23  | 0.03 |
| PHLDA2   | ENSG00000181649 | 5.06  | 0.00 |
| PHLPP1   | ENSG00000081913 | -1.46 | 0.01 |
| PHYH     | ENSG00000107537 | -1.49 | 0.01 |
| PIGZ     | ENSG00000119227 | -1.64 | 0.01 |
| PIK3AP1  | ENSG00000155629 | -1.71 | 0.02 |
| PIK3C2B  | ENSG00000133056 | -2.28 | 0.01 |
| PIK3CD   | ENSG00000171608 | 1.39  | 0.01 |
| PIK3IP1  | ENSG00000100100 | -2.10 | 0.00 |
| PIK3R3   | ENSG00000117461 | -2.10 | 0.01 |
| PIM1     | ENSG00000137193 | 1.89  | 0.00 |
| PIMREG   | ENSG00000129195 | -1.71 | 0.01 |
| PIP5K1B  | ENSG00000107242 | -1.64 | 0.00 |
| PIPOX    | ENSG00000179761 | -1.53 | 0.01 |
| PIR      | ENSG00000087842 | 2.8   | 0.00 |
| PITHD1   | ENSG00000057757 | 1.49  | 0.01 |
| PKD1L2   | ENSG00000166473 | 2.31  | 0.01 |
| PLA2G12B | ENSG00000138308 | -1.49 | 0.00 |
| PLA2G2A  | ENSG00000188257 | -2.79 | 0.01 |
| PLA2G3   | ENSG00000100078 | -2.97 | 0.03 |
| PLAA     | ENSG00000137055 | 1.31  | 0.03 |
| PLAC8    | ENSG00000145287 | 1.78  | 0.00 |
| PLCXD1   | ENSG00000182378 | -1.30 | 0.02 |
| PLD6     | ENSG00000179598 | 1.24  | 0.05 |
| PLEKHA7  | ENSG00000166689 | -1.58 | 0.02 |
| PLEKHB1  | ENSG00000021300 | -1.60 | 0.00 |
| PLEKHG3  | ENSG00000126822 | -1.58 | 0.01 |
| PLEKHG6  | ENSG00000008323 | -1.55 | 0.01 |
| PLEKHO2  | ENSG00000241839 | 1.4   | 0.03 |
| PLIN2    | ENSG00000147872 | 1.46  | 0.01 |
| PLK3     | ENSG00000173846 | 1.71  | 0.00 |
| PLPPR1   | ENSG00000148123 | -1.84 | 0.00 |
| PLXNC1   | ENSG00000136040 | -2.00 | 0.01 |
| PMM1     | ENSG00000100417 | -1.61 | 0.02 |
| PNKD     | ENSG00000127838 | 1.35  | 0.02 |
| PNMA1    | ENSG00000176903 | 1.35  | 0.01 |
| PNO1     | ENSG00000115946 | 1.54  | 0.00 |
| PNP      | ENSG00000198805 | 1.49  | 0.02 |
| PNPLA3   | ENSG00000100344 | -1.49 | 0.03 |
| POC1A    | ENSG00000164087 | -1.72 | 0.01 |
| POLH     | ENSG00000170734 | -1.41 | 0.02 |
| POLQ     | ENSG00000051341 | -1.85 | 0.04 |
| POLR3G   | ENSG00000113356 | 2.21  | 0.04 |
| PPID     | ENSG00000171497 | 1.39  | 0.04 |
| PPIP5K1  | ENSG00000168781 | -1.78 | 0.01 |
| PPM1H    | ENSG00000111110 | -1.39 | 0.04 |

|           |                 |       |      |
|-----------|-----------------|-------|------|
| PPP1R15A  | ENSG00000087074 | 1.58  | 0.02 |
| PPP1R3C   | ENSG00000119938 | -1.58 | 0.03 |
| PPP2CB    | ENSG00000104695 | 1.35  | 0.00 |
| PPP3CC    | ENSG00000120910 | 1.42  | 0.02 |
| PQLC2     | ENSG00000040487 | 1.63  | 0.02 |
| PQLC3     | ENSG00000162976 | -1.97 | 0.04 |
| PRC1      | ENSG00000198901 | -1.43 | 0.02 |
| PRDX1     | ENSG00000117450 | 1.54  | 0.00 |
| PRIMA1    | ENSG00000175785 | -2.04 | 0.02 |
| PRIMPOL   | ENSG00000164306 | -1.77 | 0.01 |
| PRKCH     | ENSG00000027075 | 3.4   | 0.00 |
| PRMT3     | ENSG00000185238 | 1.51  | 0.01 |
| PRNP      | ENSG00000171867 | 1.43  | 0.01 |
| PRPSAP1   | ENSG00000161542 | -1.64 | 0.00 |
| PRR12     | ENSG00000126464 | -1.48 | 0.01 |
| PRR15     | ENSG00000176532 | -1.54 | 0.02 |
| PRR15L    | ENSG00000167183 | -3.07 | 0.01 |
| PRR36     | ENSG00000183248 | -1.93 | 0.01 |
| PRR5      | ENSG00000186654 | 1.51  | 0.04 |
| PRSS36    | ENSG00000178226 | -2.73 | 0.04 |
| PRSS8     | ENSG00000052344 | -1.68 | 0.02 |
| PRUNE1    | ENSG00000143363 | -1.93 | 0.00 |
| PSMB8-AS1 | ENSG00000204261 | -2.06 | 0.01 |
| PSMC2     | ENSG00000161057 | 1.3   | 0.03 |
| PSMD1     | ENSG00000173692 | 1.33  | 0.00 |
| PSMD11    | ENSG00000108671 | 1.48  | 0.00 |
| PSMD12    | ENSG00000197170 | 1.47  | 0.02 |
| PSMD14    | ENSG00000115233 | 1.36  | 0.01 |
| PSMD6     | ENSG00000163636 | 1.36  | 0.04 |
| PSMD7     | ENSG00000103035 | 1.46  | 0.03 |
| PSMF1     | ENSG00000125818 | 1.34  | 0.04 |
| PSPC1P1   | ENSG00000227879 | -1.27 | 0.04 |
| PSRC1     | ENSG00000134222 | -1.75 | 0.02 |
| PTGES3    | ENSG00000110958 | 1.55  | 0.03 |
| PTGR1     | ENSG00000106853 | 5.23  | 0.00 |
| PTK2B     | ENSG00000120899 | -1.91 | 0.03 |
| PTRH2     | ENSG00000141378 | 1.5   | 0.01 |
| PTS       | ENSG00000150787 | 1.47  | 0.01 |
| PUM3      | ENSG00000080608 | 1.55  | 0.00 |
| PWP1      | ENSG00000136045 | 1.3   | 0.03 |
| PWP2      | ENSG00000241945 | 1.55  | 0.01 |
| PXDC1     | ENSG00000168994 | 2.34  | 0.01 |
| PXYLP1    | ENSG00000155893 | -1.95 | 0.01 |
| PYGL      | ENSG00000100504 | -1.24 | 0.04 |
| PYGO2     | ENSG00000163348 | 1.35  | 0.01 |
| RAB10     | ENSG00000084733 | 1.54  | 0.00 |

|           |                 |       |      |
|-----------|-----------------|-------|------|
| RAB11FIP1 | ENSG00000156675 | -1.40 | 0.04 |
| RAB3B     | ENSG00000169213 | 1.92  | 0.00 |
| RAB40B    | ENSG00000141542 | -1.40 | 0.04 |
| RAB7A     | ENSG00000075785 | 1.2   | 0.03 |
| RABGGTA   | ENSG00000100949 | 1.37  | 0.04 |
| RALGPS1   | ENSG00000136828 | -2.38 | 0.00 |
| RARS2     | ENSG00000146282 | -1.29 | 0.05 |
| RASD1     | ENSG00000108551 | 3.29  | 0.00 |
| RASGRF2   | ENSG00000113319 | 1.55  | 0.03 |
| RBL1      | ENSG00000080839 | -1.66 | 0.05 |
| RBM19     | ENSG00000122965 | 1.42  | 0.00 |
| RBM24     | ENSG00000112183 | 3.26  | 0.00 |
| RBM7      | ENSG00000076053 | 1.48  | 0.00 |
| RELL2     | ENSG00000164620 | 1.88  | 0.01 |
| RELN      | ENSG00000189056 | -1.78 | 0.04 |
| RELT      | ENSG00000054967 | 1.6   | 0.01 |
| RER1      | ENSG00000157916 | 1.54  | 0.01 |
| REXO5     | ENSG00000005189 | -2.10 | 0.00 |
| RFC1      | ENSG00000035928 | -1.47 | 0.02 |
| RFFL      | ENSG00000092871 | 1.31  | 0.05 |
| RGN       | ENSG00000130988 | -1.77 | 0.00 |
| RGS20     | ENSG00000147509 | 2.63  | 0.03 |
| RGS3      | ENSG00000138835 | 1.87  | 0.01 |
| RHBDF2    | ENSG00000129667 | 1.46  | 0.02 |
| RHBDL2    | ENSG00000158315 | -2.68 | 0.00 |
| RHBG      | ENSG00000132677 | -1.51 | 0.05 |
| RHOBTB1   | ENSG00000072422 | -1.59 | 0.00 |
| RHOBTB2   | ENSG00000008853 | -1.61 | 0.02 |
| RHOU      | ENSG00000116574 | -1.88 | 0.00 |
| RIMS3     | ENSG00000117016 | -1.52 | 0.02 |
| RIN2      | ENSG00000132669 | 1.66  | 0.01 |
| RIPK1     | ENSG00000137275 | -1.34 | 0.02 |
| RIT1      | ENSG00000143622 | 1.46  | 0.03 |
| RMI2      | ENSG00000175643 | -1.79 | 0.00 |
| RNA5SP111 | ENSG00000223318 | -1.58 | 0.04 |
| RNF144A   | ENSG00000151692 | -2.07 | 0.00 |
| RNF183    | ENSG00000165188 | 2.11  | 0.00 |
| RNF207    | ENSG00000158286 | -1.67 | 0.04 |
| RPL23AP7  | ENSG00000240356 | 1.51  | 0.04 |
| RPSAP69   | ENSG00000233487 | -1.51 | 0.01 |
| RRP1      | ENSG00000160214 | 1.52  | 0.01 |
| RRP12     | ENSG00000052749 | 1.76  | 0.00 |
| RRP9      | ENSG00000114767 | 1.7   | 0.01 |
| RRS1      | ENSG00000179041 | 1.37  | 0.02 |
| RTN4      | ENSG00000115310 | 1.2   | 0.04 |
| S100A11   | ENSG00000163191 | 1.8   | 0.04 |

|            |                 |       |      |
|------------|-----------------|-------|------|
| SALL2      | ENSG00000165821 | -2.00 | 0.00 |
| SALL4      | ENSG00000101115 | -2.46 | 0.01 |
| SAT1       | ENSG00000130066 | 1.67  | 0.00 |
| SBK1       | ENSG00000188322 | -3.05 | 0.00 |
| SBK3       | ENSG00000231274 | 2.53  | 0.00 |
| SCAMP5     | ENSG00000198794 | 1.73  | 0.01 |
| SCARA3     | ENSG00000168077 | -2.01 | 0.03 |
| SCFD2      | ENSG00000184178 | 1.38  | 0.02 |
| SCN1A      | ENSG00000144285 | -3.18 | 0.00 |
| SCN1B      | ENSG00000105711 | -2.17 | 0.03 |
| SCN9A      | ENSG00000169432 | -2.30 | 0.04 |
| SDCBP2-AS1 | ENSG00000234684 | -2.38 | 0.03 |
| SDCCAG3    | ENSG00000165689 | 1.72  | 0.02 |
| SEBOX      | ENSG00000274529 | -1.57 | 0.01 |
| SEH1L      | ENSG00000085415 | 1.48  | 0.02 |
| SEL1L3     | ENSG00000091490 | 2.43  | 0.00 |
| SEMA4G     | ENSG00000095539 | -1.78 | 0.02 |
| SEMA6A     | ENSG00000092421 | -1.67 | 0.04 |
| SEMA6B     | ENSG00000167680 | -1.67 | 0.02 |
| SEMA6C     | ENSG00000143434 | -2.22 | 0.00 |
| SEPHS2     | ENSG00000179918 | -1.21 | 0.03 |
| SEPTIN6    | ENSG00000125354 | -1.67 | 0.00 |
| SEPTIN8    | ENSG00000164402 | -1.36 | 0.04 |
| SERPINA12  | ENSG00000165953 | -1.97 | 0.03 |
| SERPINA6   | ENSG00000170099 | -1.64 | 0.02 |
| SERPINA7   | ENSG00000123561 | -1.55 | 0.00 |
| SERPINB1   | ENSG00000021355 | -1.29 | 0.03 |
| SERPINC1   | ENSG00000117601 | -1.33 | 0.03 |
| SERPINE1   | ENSG00000106366 | 1.66  | 0.01 |
| SERPINE2   | ENSG00000135919 | 1.6   | 0.01 |
| SERTAD1    | ENSG00000197019 | 2.21  | 0.01 |
| SFN        | ENSG00000175793 | 2.31  | 0.00 |
| SFXN2      | ENSG00000156398 | -1.45 | 0.01 |
| SFXN3      | ENSG00000107819 | -1.56 | 0.01 |
| SGK1       | ENSG00000118515 | -1.93 | 0.01 |
| SGO1       | ENSG00000129810 | -1.60 | 0.02 |
| SH2B1      | ENSG00000178188 | -1.40 | 0.03 |
| SH2D4A     | ENSG00000104611 | -1.71 | 0.00 |
| SH2D5      | ENSG00000189410 | 2.74  | 0.00 |
| SH3RF1     | ENSG00000154447 | 1.72  | 0.02 |
| SIK2       | ENSG00000170145 | -1.41 | 0.02 |
| SIN3A      | ENSG00000169375 | -1.38 | 0.04 |
| SIRPA      | ENSG00000198053 | -1.37 | 0.01 |
| SIRT3      | ENSG00000142082 | -1.62 | 0.01 |
| SIRT5      | ENSG00000124523 | -1.57 | 0.00 |
| SIRT6      | ENSG00000077463 | 1.51  | 0.05 |

|             |                 |       |      |
|-------------|-----------------|-------|------|
| SIRT7       | ENSG00000187531 | 1.51  | 0.00 |
| SKA1        | ENSG00000154839 | -2.46 | 0.03 |
| SLC11A2     | ENSG00000110911 | -1.45 | 0.01 |
| SLC13A3     | ENSG00000158296 | -1.44 | 0.01 |
| SLC13A5     | ENSG00000141485 | -1.39 | 0.03 |
| SLC16A10    | ENSG00000112394 | -1.88 | 0.03 |
| SLC16A13    | ENSG00000174327 | -1.44 | 0.00 |
| SLC16A6     | ENSG00000108932 | 4.3   | 0.00 |
| SLC1A4      | ENSG00000115902 | -1.51 | 0.01 |
| SLC20A1     | ENSG00000144136 | 1.86  | 0.00 |
| SLC22A18    | ENSG00000110628 | 3.36  | 0.00 |
| SLC22A18AS  | ENSG00000254827 | 3.81  | 0.00 |
| SLC22A7     | ENSG00000137204 | -2.16 | 0.02 |
| SLC25A23    | ENSG00000125648 | -1.48 | 0.03 |
| SLC26A1     | ENSG00000145217 | 1.67  | 0.01 |
| SLC29A2     | ENSG00000174669 | -1.78 | 0.03 |
| SLC29A4     | ENSG00000164638 | -1.72 | 0.03 |
| SLC30A10    | ENSG00000196660 | -1.66 | 0.03 |
| SLC35F2     | ENSG00000110660 | 1.47  | 0.01 |
| SLC35G2     | ENSG00000168917 | 1.96  | 0.00 |
| SLC38A4     | ENSG00000139209 | -1.92 | 0.04 |
| SLC39A5     | ENSG00000139540 | -1.48 | 0.02 |
| SLC44A2     | ENSG00000129353 | -1.89 | 0.00 |
| SLC46A1     | ENSG00000076351 | -1.49 | 0.03 |
| SLC5A11     | ENSG00000158865 | 4.85  | 0.00 |
| SLC6A11     | ENSG00000132164 | -1.22 | 0.05 |
| SLC6A12     | ENSG00000111181 | -5.28 | 0.02 |
| SLC6A4      | ENSG00000108576 | -1.88 | 0.00 |
| SLC6A9      | ENSG00000196517 | -1.91 | 0.00 |
| SLC7A5      | ENSG00000103257 | 1.33  | 0.03 |
| SLC8B1      | ENSG00000089060 | -1.54 | 0.04 |
| SLCO2B1     | ENSG00000137491 | -1.83 | 0.00 |
| SLCO4A1-AS1 | ENSG00000232803 | -2.20 | 0.04 |
| SLCO4C1     | ENSG00000173930 | -1.85 | 0.04 |
| SMARCE1     | ENSG00000073584 | -1.42 | 0.03 |
| SMG1P6      | ENSG00000254634 | 1.66  | 0.04 |
| SMIM24      | ENSG00000095932 | -1.75 | 0.02 |
| SMO         | ENSG00000128602 | -1.64 | 0.01 |
| SMTNL2      | ENSG00000188176 | -6.06 | 0.01 |
| SNAI1       | ENSG00000124216 | 1.71  | 0.04 |
| SNCG        | ENSG00000173267 | 10.05 | 0.03 |
| SNN         | ENSG00000184602 | -1.62 | 0.01 |
| SNTA1       | ENSG00000101400 | -1.59 | 0.01 |
| SOBP        | ENSG00000112320 | -1.80 | 0.00 |
| SOCS1       | ENSG00000185338 | -2.30 | 0.00 |
| SOGA1       | ENSG00000149639 | -1.49 | 0.04 |

|            |                 |       |      |
|------------|-----------------|-------|------|
| SORBS2     | ENSG00000154556 | -1.61 | 0.01 |
| SOWAHA     | ENSG00000198944 | -5.82 | 0.01 |
| SP1        | ENSG00000185591 | 2.99  | 0.02 |
| SP5        | ENSG00000204335 | -1.80 | 0.00 |
| SPARC      | ENSG00000113140 | -1.58 | 0.01 |
| SPIRE2     | ENSG00000204991 | -1.53 | 0.01 |
| SPP1       | ENSG00000118785 | 5.85  | 0.00 |
| SPRY4      | ENSG00000187678 | 1.84  | 0.00 |
| SPTLC3     | ENSG00000172296 | -3.92 | 0.00 |
| SQSTM1     | ENSG00000161011 | 3.32  | 0.00 |
| SRD5A3     | ENSG00000128039 | -1.42 | 0.03 |
| SREBF1     | ENSG00000072310 | -1.44 | 0.01 |
| SRM        | ENSG00000116649 | 1.65  | 0.04 |
| SRPRB      | ENSG00000144867 | 1.44  | 0.01 |
| SRXN1      | ENSG00000271303 | 5.4   | 0.00 |
| SSBP1      | ENSG00000106028 | 1.44  | 0.02 |
| SSBP3      | ENSG00000157216 | -1.40 | 0.01 |
| SSC4D      | ENSG00000146700 | -1.71 | 0.03 |
| ST3GAL4    | ENSG00000110080 | 1.68  | 0.01 |
| ST3GAL5    | ENSG00000115525 | -1.95 | 0.01 |
| ST6GALNAC4 | ENSG00000136840 | 1.79  | 0.02 |
| STAR       | ENSG00000147465 | -2.43 | 0.00 |
| STC2       | ENSG00000113739 | 1.42  | 0.03 |
| STIP1      | ENSG00000168439 | 1.26  | 0.04 |
| STK33      | ENSG00000130413 | -2.68 | 0.02 |
| STMN1      | ENSG00000117632 | -1.97 | 0.03 |
| STOML2     | ENSG00000165283 | 1.37  | 0.02 |
| STRA6      | ENSG00000137868 | -2.20 | 0.02 |
| STRAP      | ENSG00000023734 | 1.38  | 0.02 |
| STX3       | ENSG00000166900 | 2.23  | 0.01 |
| SULT1A2    | ENSG00000197165 | 2.13  | 0.00 |
| SUPV3L1    | ENSG00000156502 | 1.33  | 0.03 |
| SUSD3      | ENSG00000157303 | -2.01 | 0.03 |
| SV2A       | ENSG00000159164 | -1.59 | 0.01 |
| SYNE1      | ENSG00000131018 | -1.60 | 0.02 |
| SYT7       | ENSG00000011347 | -1.88 | 0.01 |
| TAB1       | ENSG00000100324 | -1.40 | 0.02 |
| TACC3      | ENSG00000013810 | -1.30 | 0.04 |
| TADA1      | ENSG00000152382 | -1.32 | 0.03 |
| TAGLN3     | ENSG00000144834 | 65.61 | 0.00 |
| TALDO1     | ENSG00000177156 | 2.19  | 0.00 |
| TAT        | ENSG00000198650 | 2.23  | 0.00 |
| TBC1D13    | ENSG00000107021 | -1.33 | 0.02 |
| TBL1X      | ENSG00000101849 | -1.39 | 0.02 |
| TBL1Y      | ENSG00000092377 | -2.35 | 0.02 |
| TBX2       | ENSG00000121068 | -2.81 | 0.00 |



|           |                 |       |      |
|-----------|-----------------|-------|------|
| TBX2-AS1  | ENSG00000267280 | -3.16 | 0.00 |
| TCEA3     | ENSG00000204219 | -1.96 | 0.00 |
| TCF19     | ENSG00000137310 | -1.44 | 0.01 |
| TCN2      | ENSG00000185339 | -2.23 | 0.02 |
| TCTN2     | ENSG00000168778 | -1.72 | 0.02 |
| TEAD2     | ENSG00000074219 | -1.60 | 0.02 |
| TECPR2    | ENSG00000196663 | -1.51 | 0.04 |
| TEF       | ENSG00000167074 | -2.14 | 0.00 |
| TESK2     | ENSG00000070759 | -2.19 | 0.00 |
| TFDP2     | ENSG00000114126 | -1.41 | 0.03 |
| TFE3      | ENSG00000068323 | 1.67  | 0.00 |
| TFP1      | ENSG00000242337 | -1.39 | 0.01 |
| TGFB1     | ENSG00000105329 | 1.55  | 0.02 |
| TGM2      | ENSG00000198959 | 1.53  | 0.03 |
| THBS1     | ENSG00000137801 | 1.52  | 0.05 |
| TICAM1    | ENSG00000127666 | 1.51  | 0.02 |
| TICRR     | ENSG00000140534 | -1.52 | 0.02 |
| TIGD3     | ENSG00000173825 | -2.38 | 0.01 |
| TIMELESS  | ENSG00000111602 | -1.33 | 0.04 |
| TIMP1     | ENSG00000102265 | 2.52  | 0.00 |
| TIMP3     | ENSG00000100234 | -1.37 | 0.00 |
| TINAG     | ENSG00000137251 | 6.46  | 0.01 |
| TJP3      | ENSG00000105289 | -2.16 | 0.00 |
| TKT       | ENSG00000163931 | 1.68  | 0.01 |
| TLN2      | ENSG00000171914 | -1.96 | 0.00 |
| TLR6      | ENSG00000174130 | 3.27  | 0.03 |
| TM4SF1    | ENSG00000169908 | 2.25  | 0.00 |
| TMC8      | ENSG00000167895 | 2.41  | 0.01 |
| TMCC1     | ENSG00000172765 | 1.52  | 0.00 |
| TMEM200B  | ENSG00000253304 | -3.53 | 0.01 |
| TMEM206   | ENSG00000065600 | 1.51  | 0.01 |
| TMEM43    | ENSG00000170876 | 1.35  | 0.01 |
| TMEM52    | ENSG00000178821 | -1.77 | 0.02 |
| TMEM87A   | ENSG00000103978 | 1.32  | 0.03 |
| TMPO-AS1  | ENSG00000257167 | -2.25 | 0.02 |
| TMPRSS2   | ENSG00000184012 | -2.81 | 0.00 |
| TMPRSS6   | ENSG00000187045 | -1.61 | 0.02 |
| TNFRSF10A | ENSG00000104689 | 1.51  | 0.01 |
| TNFRSF10D | ENSG00000173530 | 1.9   | 0.00 |
| TNFRSF12A | ENSG00000006327 | 1.85  | 0.01 |
| TNFRSF19  | ENSG00000127863 | -1.59 | 0.01 |
| TNFRSF1A  | ENSG00000067182 | 1.65  | 0.01 |
| TNFRSF21  | ENSG00000146072 | 1.37  | 0.04 |
| TNFSF9    | ENSG00000125657 | 2.14  | 0.01 |
| TNNI2     | ENSG00000130598 | -2.10 | 0.03 |
| TNNT1     | ENSG00000105048 | -3.34 | 0.01 |

|            |                 |       |      |
|------------|-----------------|-------|------|
| TNRC18     | ENSG00000182095 | -1.61 | 0.00 |
| TNRC6C-AS1 | ENSG00000204282 | 1.49  | 0.03 |
| TNS4       | ENSG00000131746 | 3.03  | 0.00 |
| TOB2       | ENSG00000183864 | -1.27 | 0.04 |
| TOMM34     | ENSG00000025772 | 1.59  | 0.01 |
| TOP2A      | ENSG00000131747 | -1.67 | 0.03 |
| TOR1A      | ENSG00000136827 | 1.89  | 0.03 |
| TPX2       | ENSG00000088325 | -1.38 | 0.01 |
| TRAF3IP2   | ENSG00000056972 | -1.52 | 0.01 |
| TRAF4      | ENSG00000076604 | -1.92 | 0.02 |
| TRAPPC12   | ENSG00000171853 | 1.4   | 0.05 |
| TRIB1      | ENSG00000173334 | 1.91  | 0.00 |
| TRIM14     | ENSG00000106785 | -1.42 | 0.04 |
| TRIM24     | ENSG00000122779 | -1.39 | 0.04 |
| TRIM45     | ENSG00000134253 | -1.79 | 0.05 |
| TRIM54     | ENSG00000138100 | 6.76  | 0.03 |
| TRIM74     | ENSG00000155428 | -3.36 | 0.00 |
| TRMT1      | ENSG00000104907 | 1.56  | 0.02 |
| TRMT11     | ENSG00000066651 | 1.42  | 0.03 |
| TSC22D1    | ENSG00000102804 | -1.35 | 0.01 |
| TSKU       | ENSG00000182704 | 1.74  | 0.00 |
| TSR1       | ENSG00000167721 | 1.38  | 0.00 |
| TTC21B     | ENSG00000123607 | -1.49 | 0.04 |
| TTC30B     | ENSG00000196659 | -1.71 | 0.03 |
| TTC39C     | ENSG00000168234 | 1.57  | 0.03 |
| TTC5       | ENSG00000136319 | -1.48 | 0.04 |
| TTC9       | ENSG00000133985 | 2.26  | 0.00 |
| TTK        | ENSG00000112742 | -1.71 | 0.02 |
| TTYH1      | ENSG00000167614 | -1.69 | 0.01 |
| TUBB1      | ENSG00000101162 | -1.91 | 0.00 |
| TUSC3      | ENSG00000104723 | 8.11  | 0.04 |
| TXN        | ENSG00000136810 | 1.91  | 0.00 |
| TXNDC16    | ENSG00000087301 | -1.71 | 0.04 |
| TXNRD1     | ENSG00000198431 | 4.58  | 0.00 |
| TYMSOS     | ENSG00000176912 | -1.82 | 0.02 |
| UBA7       | ENSG00000182179 | -1.56 | 0.02 |
| UBASH3B    | ENSG00000154127 | 1.98  | 0.00 |
| UBE2C      | ENSG00000175063 | -1.52 | 0.01 |
| UBE2H      | ENSG00000186591 | -1.52 | 0.01 |
| UBE2K      | ENSG00000078140 | 1.35  | 0.03 |
| UBXN8      | ENSG00000104691 | 1.42  | 0.04 |
| UCKL1-AS1  | ENSG00000280213 | -2.23 | 0.03 |
| UGDH       | ENSG00000109814 | 2.82  | 0.00 |
| ULBP1      | ENSG00000111981 | -9.25 | 0.02 |
| UPK3A      | ENSG00000100373 | -1.68 | 0.05 |
| UPP1       | ENSG00000183696 | 2.21  | 0.01 |

|           |                 |       |      |
|-----------|-----------------|-------|------|
| UROC1     | ENSG00000159650 | -6.19 | 0.01 |
| USP3      | ENSG00000140455 | 1.32  | 0.04 |
| USP30     | ENSG00000135093 | -1.47 | 0.05 |
| USP35     | ENSG00000118369 | 1.89  | 0.00 |
| USP40     | ENSG00000085982 | -1.27 | 0.04 |
| UTP14A    | ENSG00000156697 | 1.39  | 0.04 |
| UTP4      | ENSG00000141076 | 1.44  | 0.01 |
| UTP6      | ENSG00000108651 | 1.38  | 0.01 |
| VARS      | ENSG00000204394 | 1.44  | 0.02 |
| VAV3      | ENSG00000134215 | -2.20 | 0.00 |
| VCP       | ENSG00000165280 | 1.36  | 0.05 |
| VGLL4     | ENSG00000144560 | -1.24 | 0.04 |
| VMP1      | ENSG00000062716 | 1.43  | 0.02 |
| VNN1      | ENSG00000112299 | 2.01  | 0.01 |
| VPS37D    | ENSG00000176428 | -2.38 | 0.00 |
| VSIG10    | ENSG00000176834 | -1.46 | 0.03 |
| VSNL1     | ENSG00000163032 | -1.38 | 0.01 |
| WDFY2     | ENSG00000139668 | -1.43 | 0.01 |
| WDR3      | ENSG00000065183 | 1.48  | 0.04 |
| WDR31     | ENSG00000148225 | -2.13 | 0.04 |
| WDR45B    | ENSG00000141580 | 1.22  | 0.05 |
| WDR46     | ENSG00000227057 | 1.46  | 0.03 |
| WDTC1     | ENSG00000142784 | -1.34 | 0.01 |
| WSB2      | ENSG00000176871 | 1.48  | 0.01 |
| XPNPEP1   | ENSG00000108039 | 1.31  | 0.03 |
| XPNPEP2   | ENSG00000122121 | -1.61 | 0.04 |
| XPO5      | ENSG00000124571 | 1.28  | 0.02 |
| YBX3      | ENSG00000060138 | 1.52  | 0.01 |
| YRDC      | ENSG00000196449 | 1.67  | 0.00 |
| ZBED5-AS1 | ENSG00000247271 | -3.16 | 0.04 |
| ZBTB2     | ENSG00000181472 | 1.33  | 0.03 |
| ZBTB39    | ENSG00000166860 | -1.77 | 0.02 |
| ZER1      | ENSG00000160445 | -1.38 | 0.01 |
| ZFAND2B   | ENSG00000158552 | -1.55 | 0.04 |
| ZFAND5    | ENSG00000107372 | 1.6   | 0.01 |
| ZFP14     | ENSG00000142065 | -1.89 | 0.04 |
| ZFP36L2   | ENSG00000152518 | -1.37 | 0.02 |
| ZKSCAN3   | ENSG00000189298 | -1.77 | 0.04 |
| ZMYM3     | ENSG00000147130 | -1.47 | 0.03 |
| ZNF114    | ENSG00000178150 | 4.7   | 0.02 |
| ZNF14     | ENSG00000105708 | -1.57 | 0.03 |
| ZNF143    | ENSG00000166478 | 1.54  | 0.04 |
| ZNF219    | ENSG00000165804 | -1.48 | 0.03 |
| ZNF3      | ENSG00000166526 | -1.83 | 0.03 |
| ZNF33B    | ENSG00000196693 | -1.49 | 0.03 |
| ZNF362    | ENSG00000160094 | -1.99 | 0.00 |

|         |                 |       |      |
|---------|-----------------|-------|------|
| ZNF385A | ENSG00000161642 | -2.03 | 0.02 |
| ZNF385B | ENSG00000144331 | -2.03 | 0.02 |
| ZNF395  | ENSG00000186918 | -1.66 | 0.00 |
| ZNF496  | ENSG00000162714 | -1.79 | 0.00 |
| ZNF562  | ENSG00000171466 | 2.82  | 0.03 |
| ZNF629  | ENSG00000102870 | -1.57 | 0.01 |
| ZNF692  | ENSG00000171163 | 1.41  | 0.04 |
| ZNF724  | ENSG00000196081 | -1.39 | 0.02 |
| ZNF746  | ENSG00000181220 | 1.58  | 0.01 |
| ZNF846  | ENSG00000196605 | -2.55 | 0.01 |
| ZNF853  | ENSG00000236609 | 1.53  | 0.03 |
| ZNRF3   | ENSG00000183579 | -1.34 | 0.03 |
| ZPR1    | ENSG00000109917 | 1.38  | 0.04 |
| ZSCAN12 | ENSG00000158691 | -1.95 | 0.05 |
| ZSCAN16 | ENSG00000196812 | -1.71 | 0.02 |
| ZSCAN26 | ENSG00000197062 | -2.19 | 0.02 |

<sup>1</sup>Fold change of SF treated cells compared to DMSO control

<sup>2</sup>adjusted p-values (q-values) were determined through Benjamini-Hochberg
